# Supplementary material
Source: PubMed Central journal article supplement (PMC4826333)

# Supporting Information

## Structure-Activity Relationship and Pharmacokinetic Studies of 1,5-Diheteroaryl penta-1,4-dien-3-ones: A Class of Promising Curcumin-Based Anti-Cancer Agents

Rubing Wang<sup>†</sup>, Chengsheng Chen<sup>†</sup>, Xiaojie Zhang<sup>†</sup>, Changde Zhang<sup>‡</sup>, Qiu Zhong<sup>§</sup>,  
Guanglin Chen<sup>†</sup>, Qiang Zhang<sup>§</sup>, Shilong Zheng<sup>§</sup>, Guangdi Wang<sup>‡,§</sup>, and Qiao-Hong  
Chen<sup>\*,†</sup>

<sup>†</sup>Department of Chemistry, California State University, Fresno, 2555 E. San Ramon Avenue, M/S  
SB70, Fresno, CA 93740, USA

<sup>‡</sup>Department of Chemistry and <sup>§</sup>RCMI Cancer Research Center, Xavier University of Louisiana, 1  
Drexel Drive, New Orleans, LA 70125, USA

### Content:

<sup>1</sup>H NMR and <sup>13</sup>C NMR spectra-----S2

---

### Corresponding author.

\*E-mail: [qchen@csufresno.edu](mailto:qchen@csufresno.edu). Phone: (+1)5592782394. Fax: (+1)5592784402.

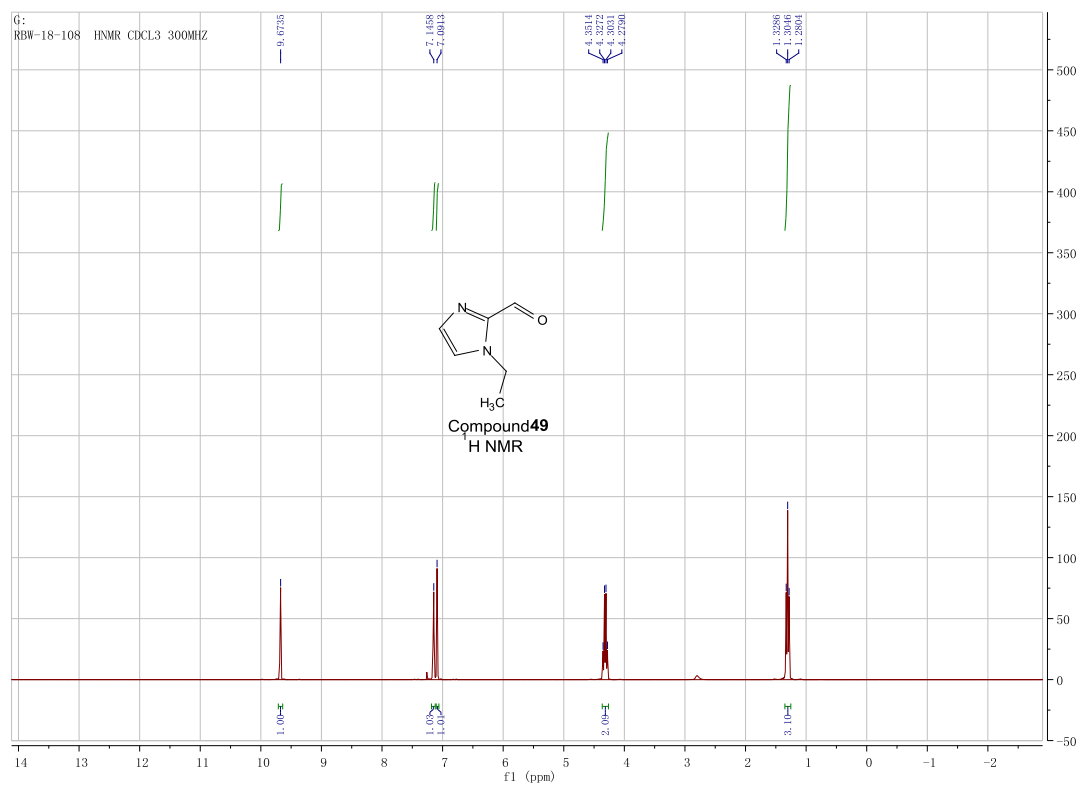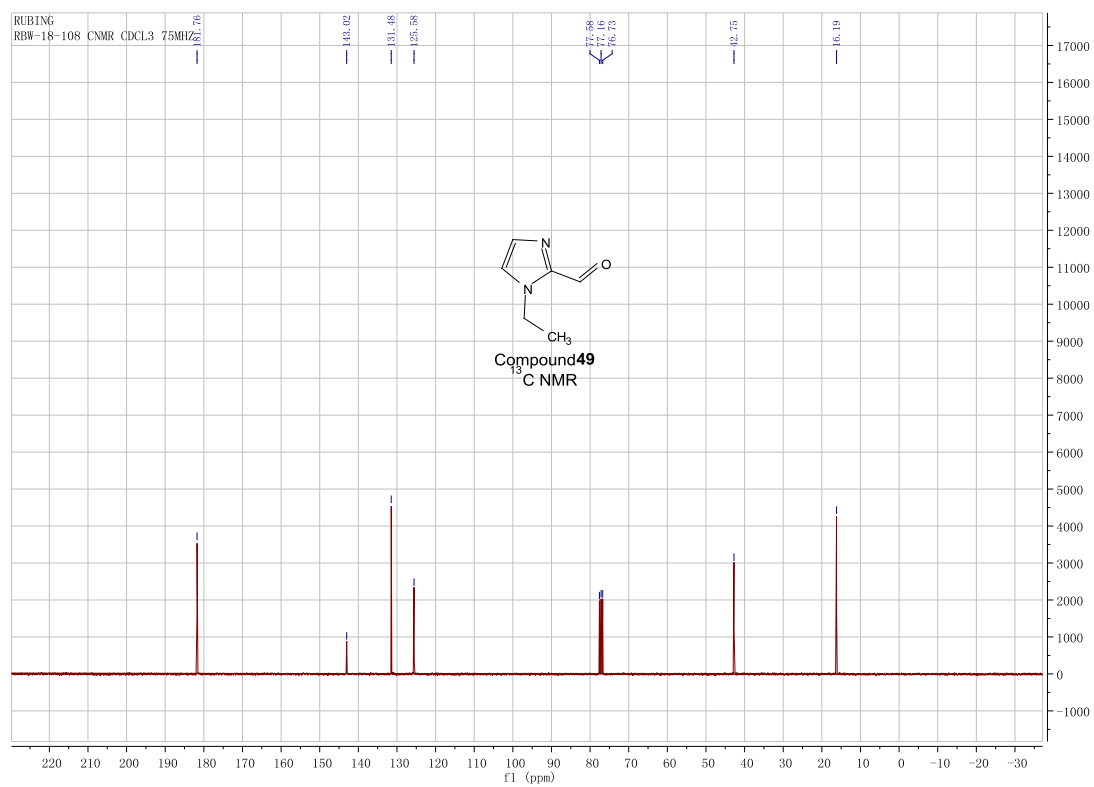

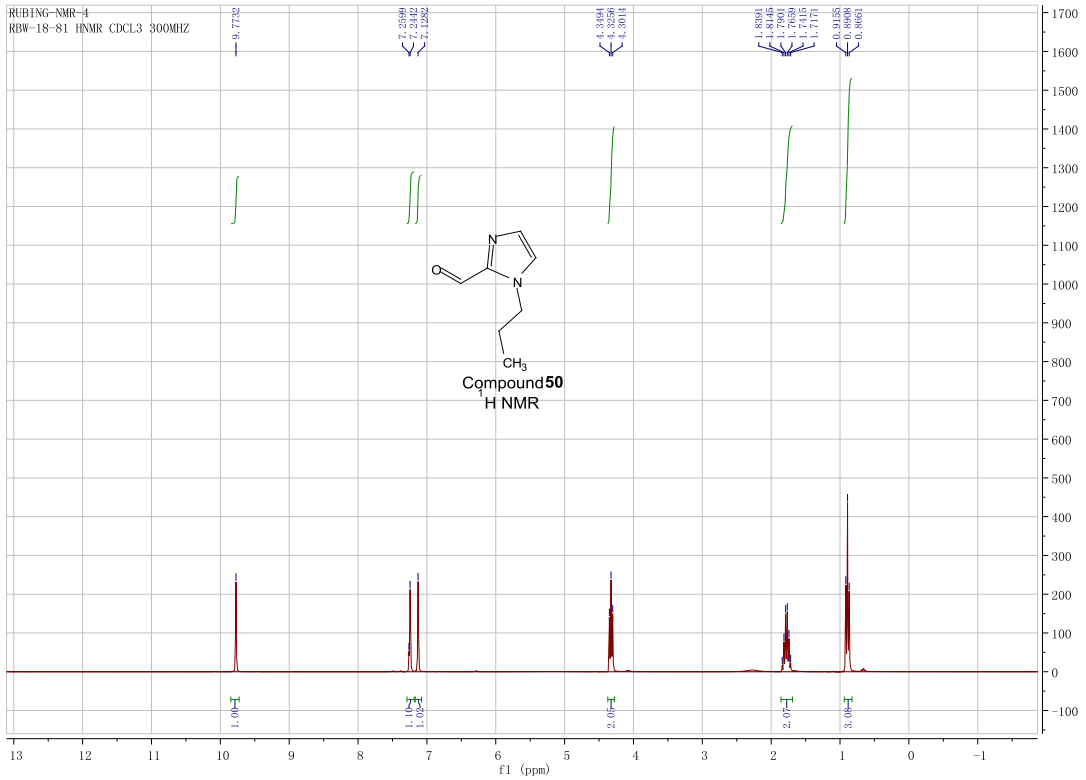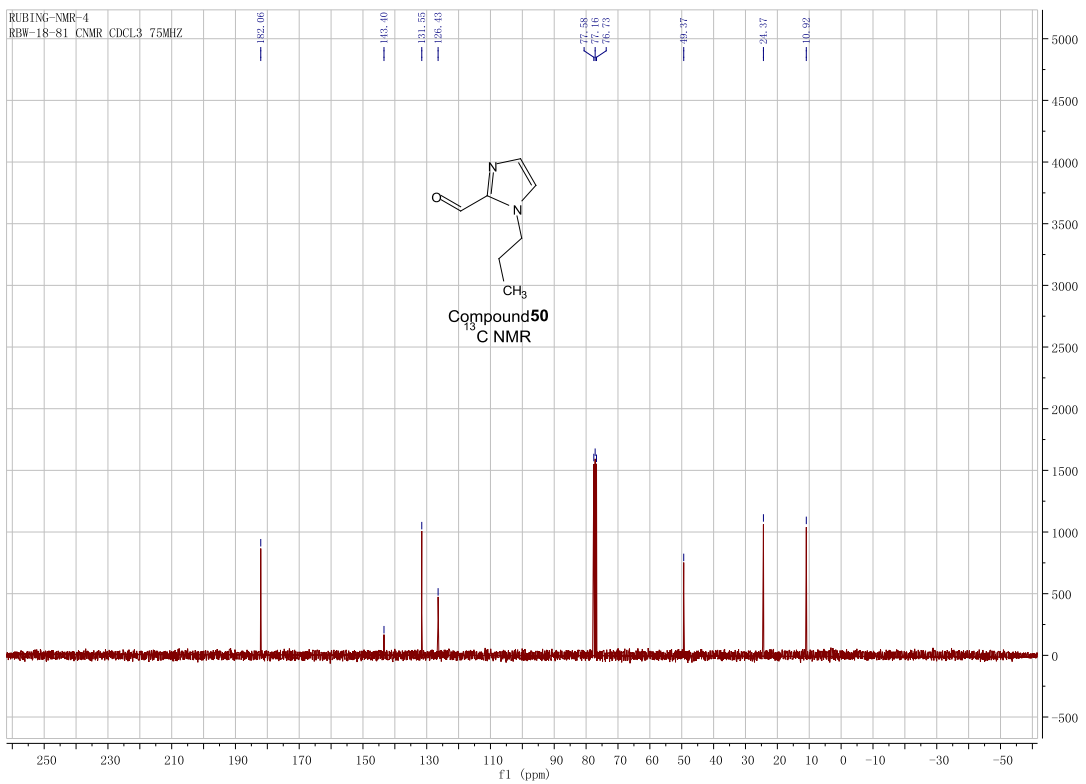

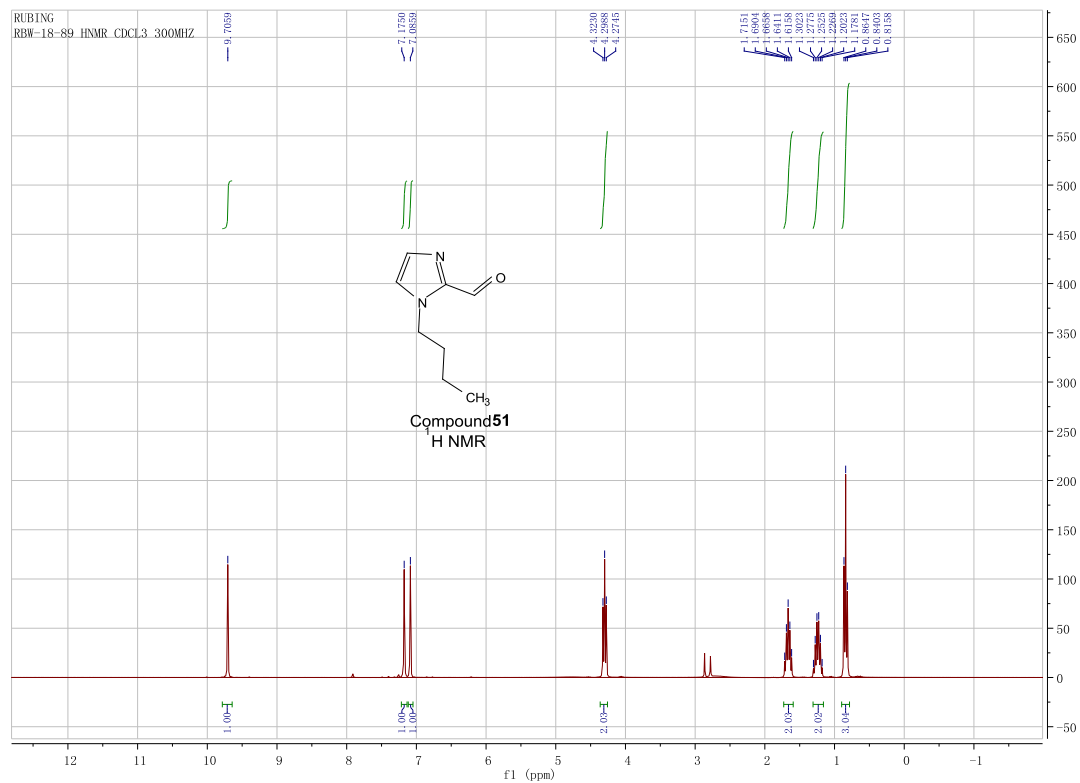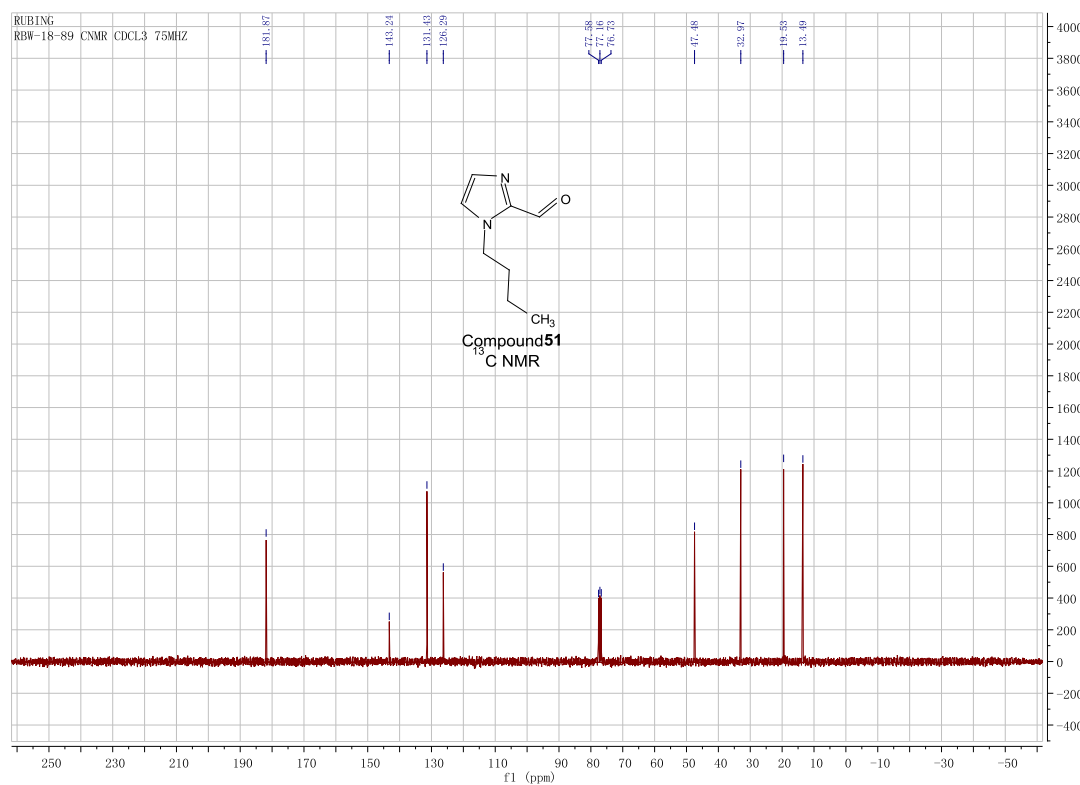

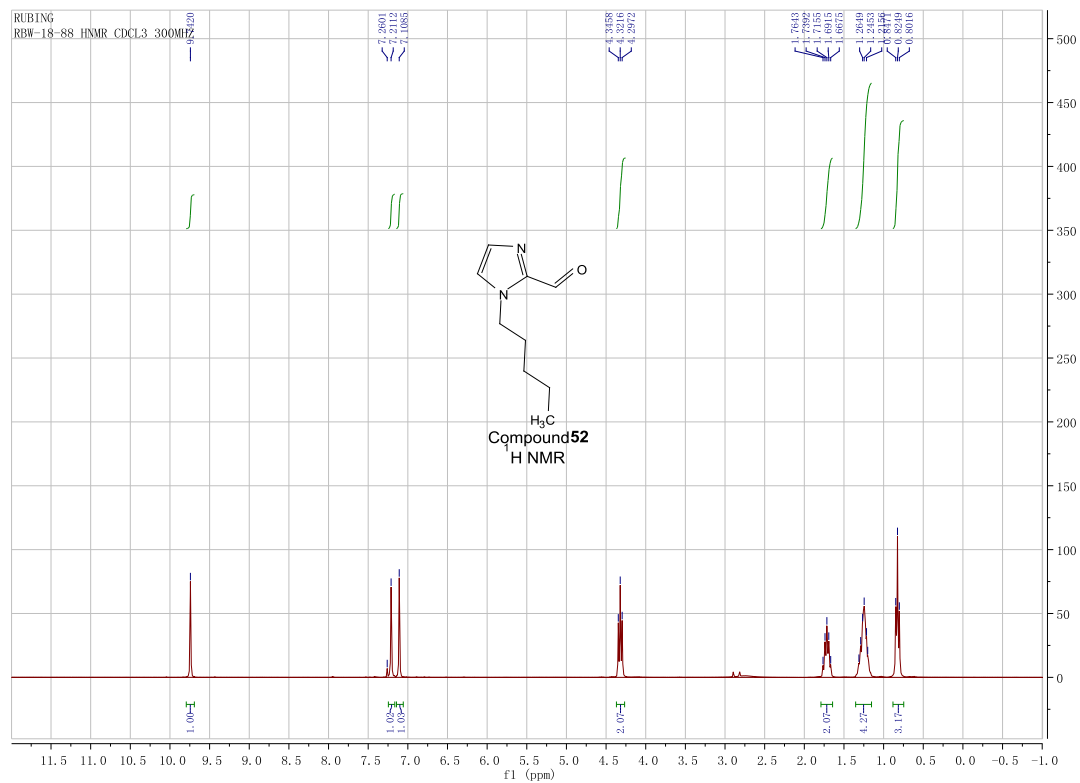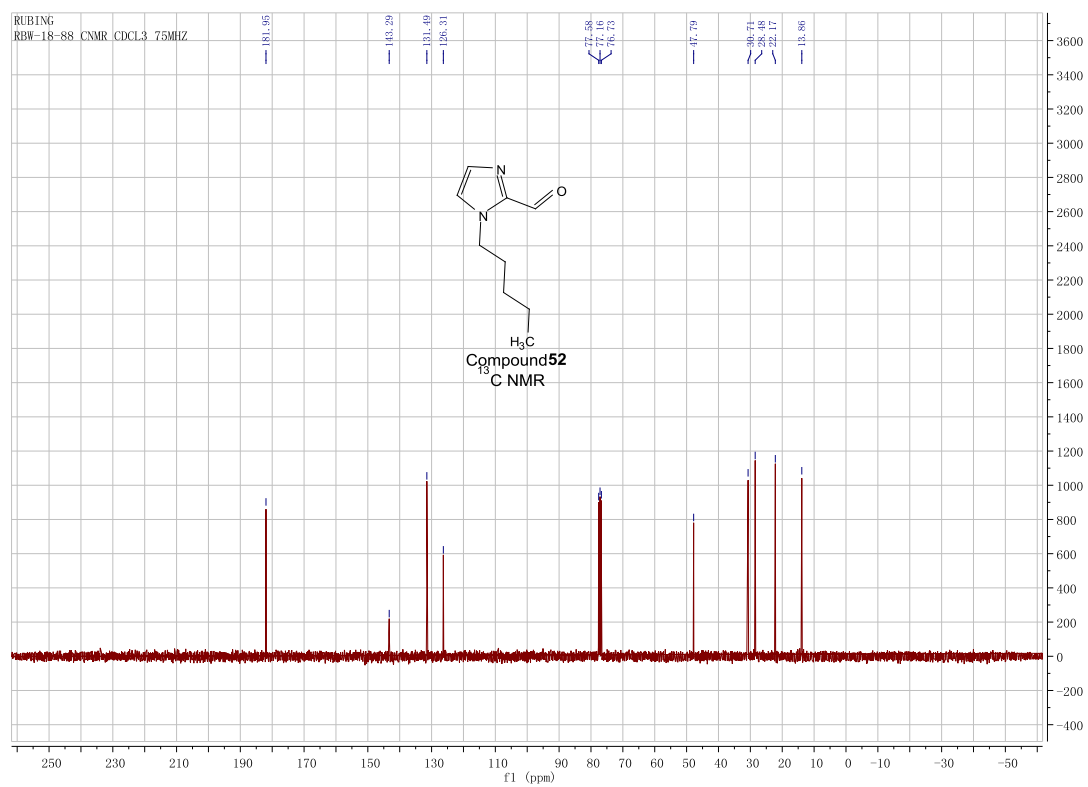

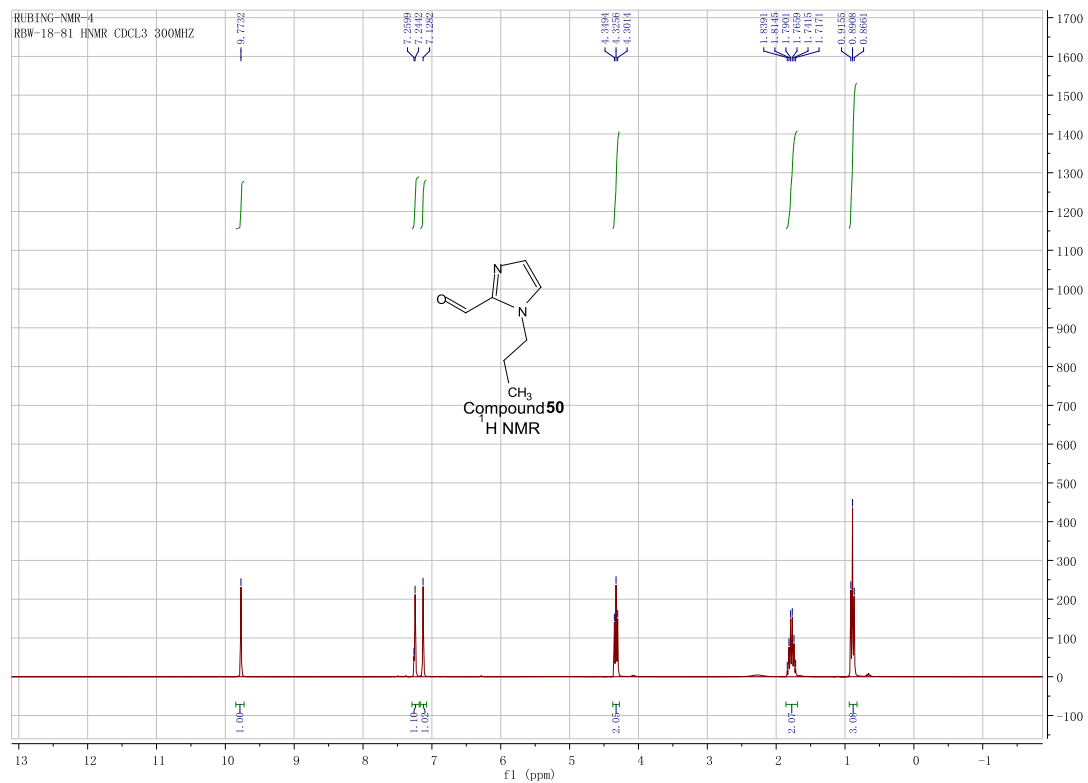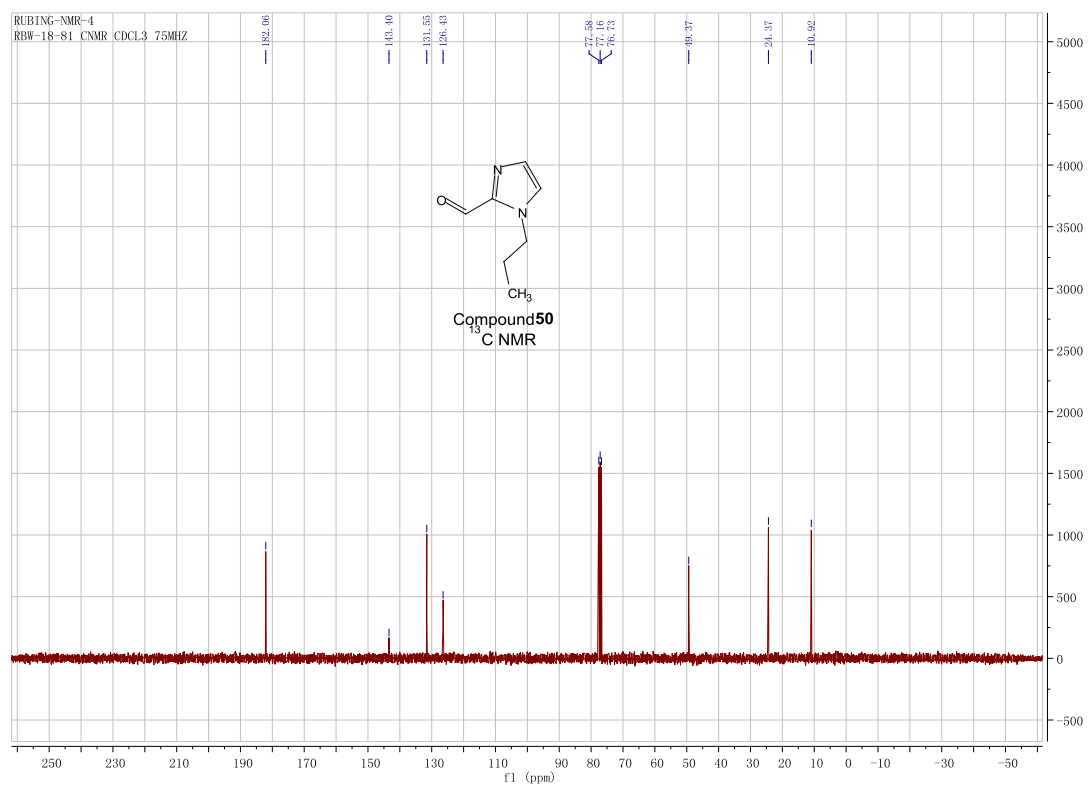







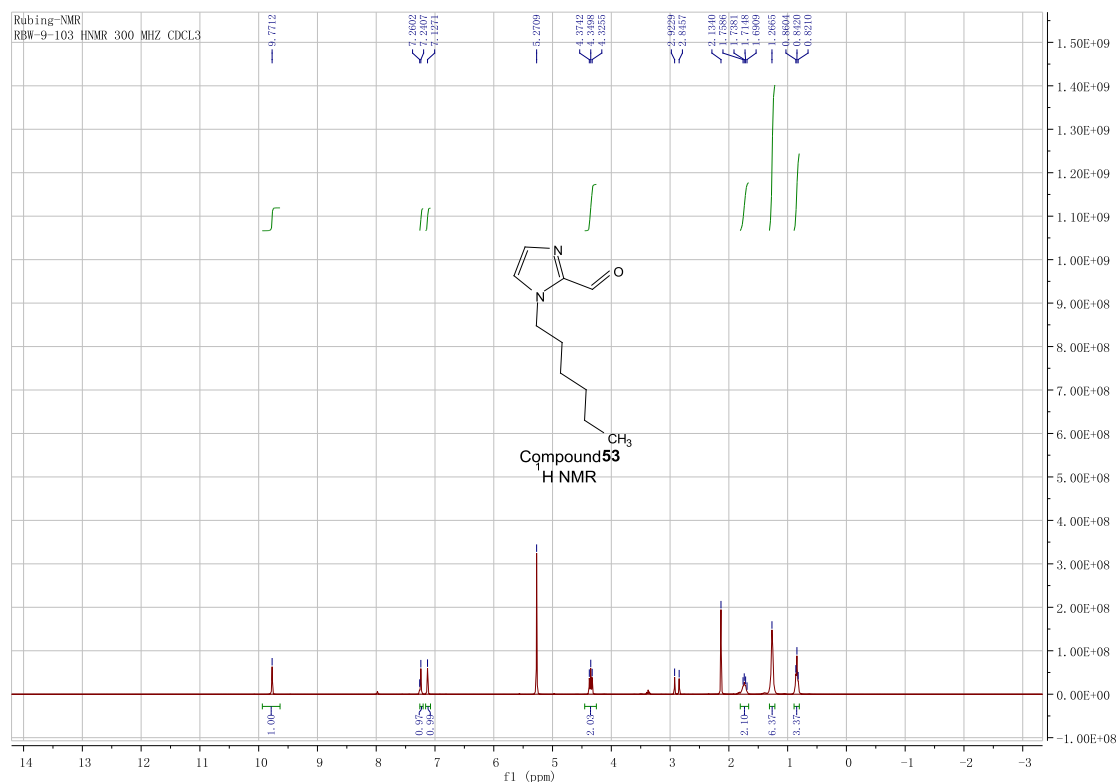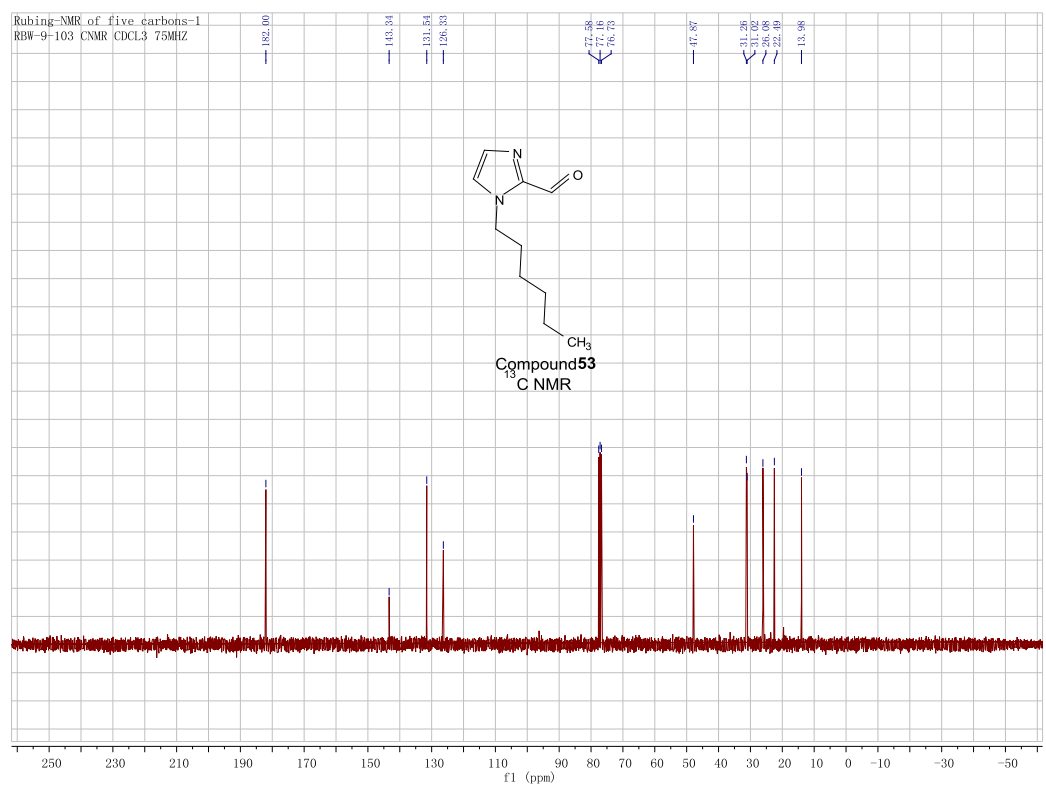

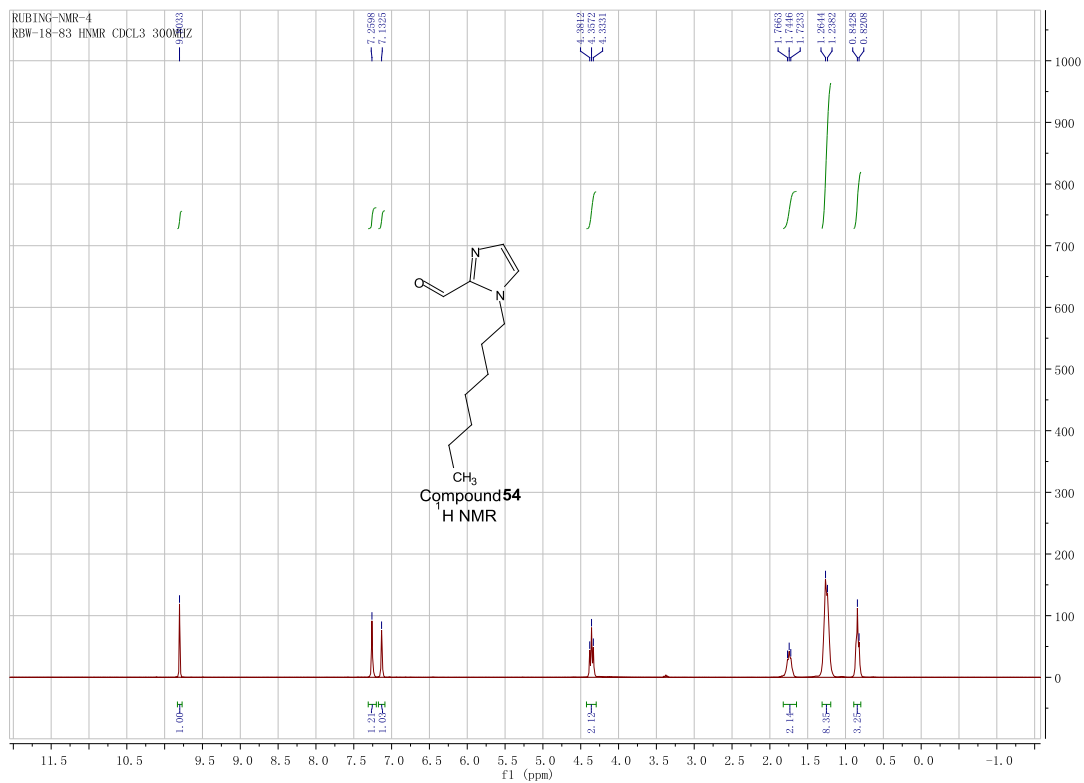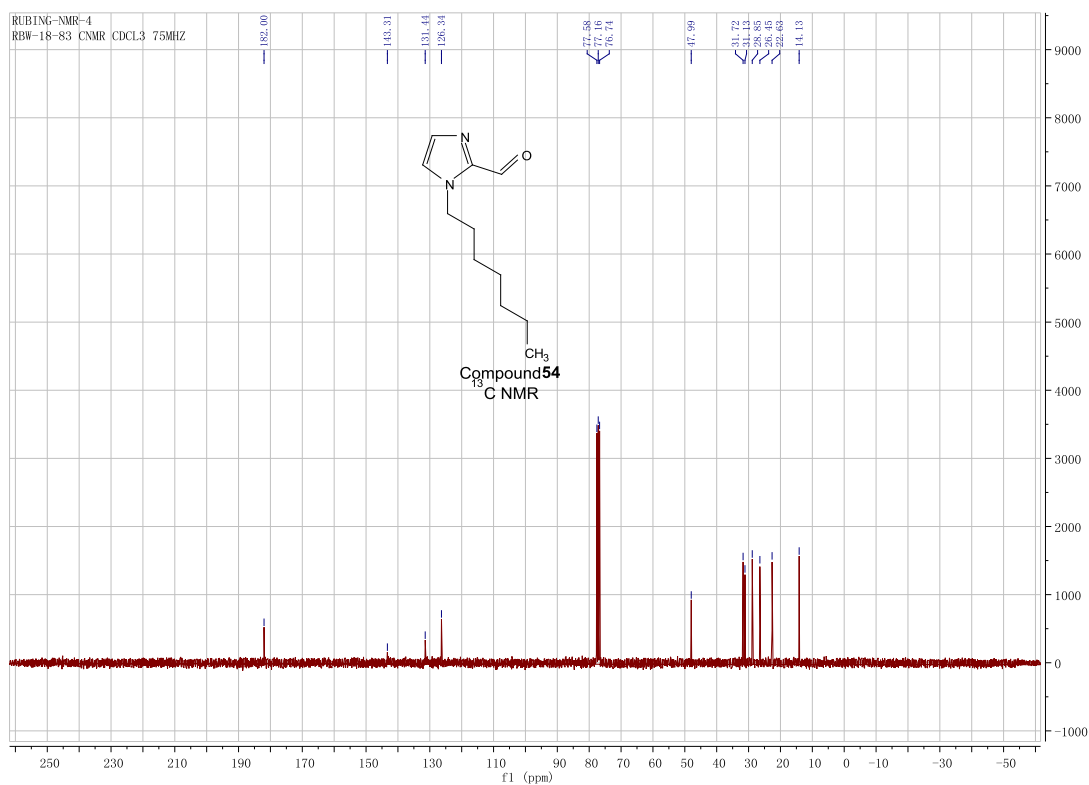

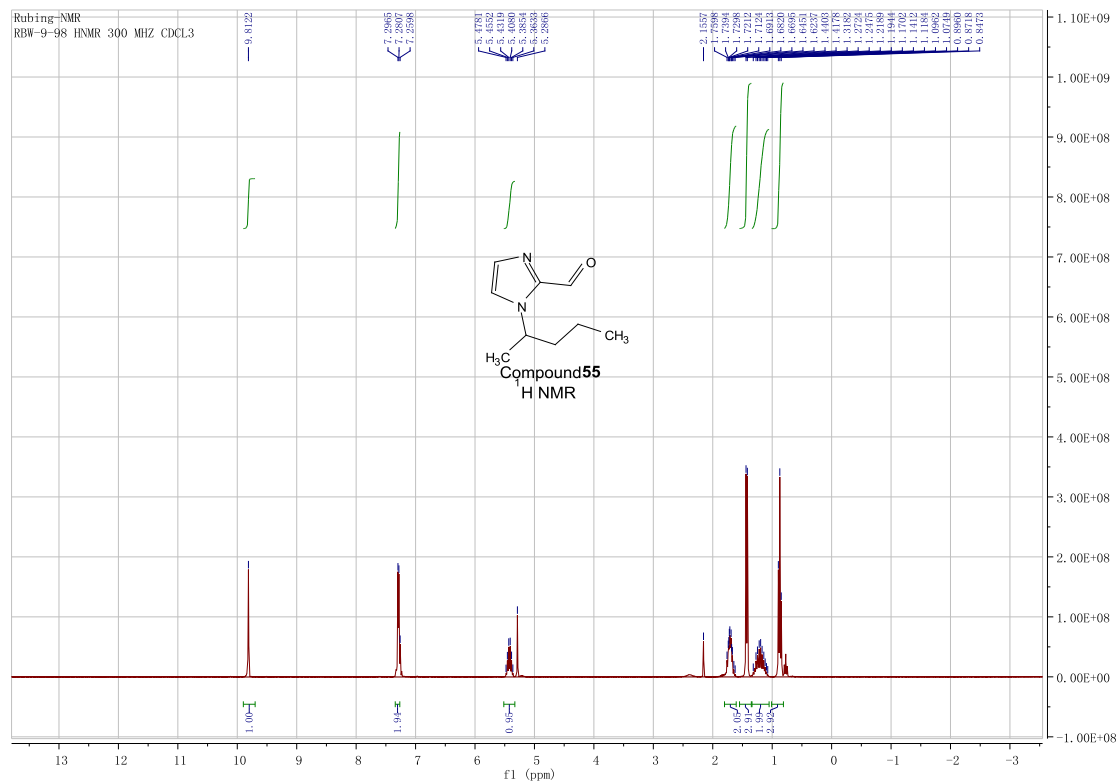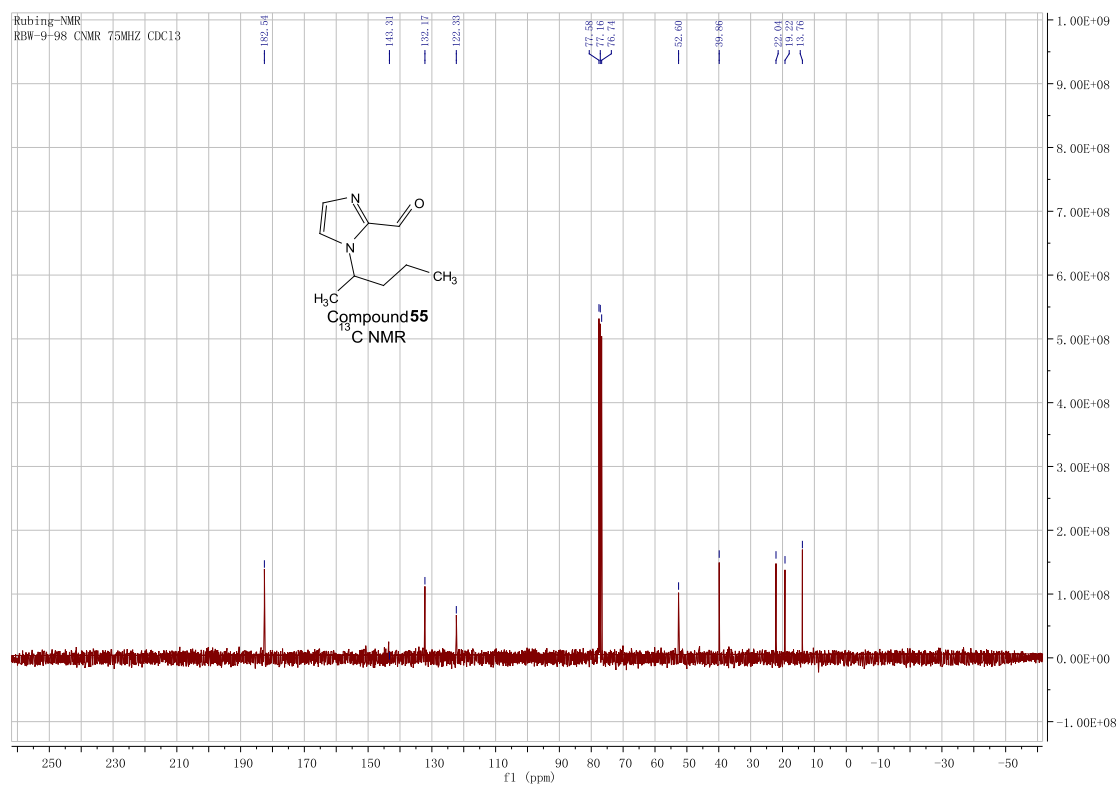

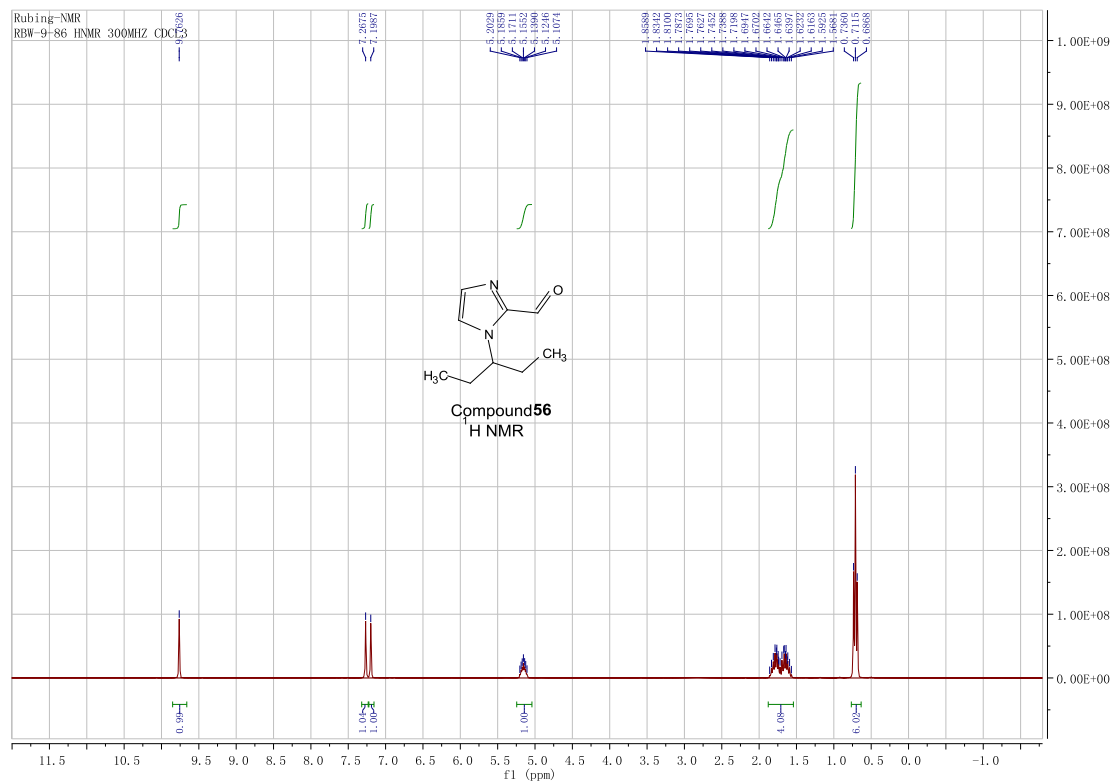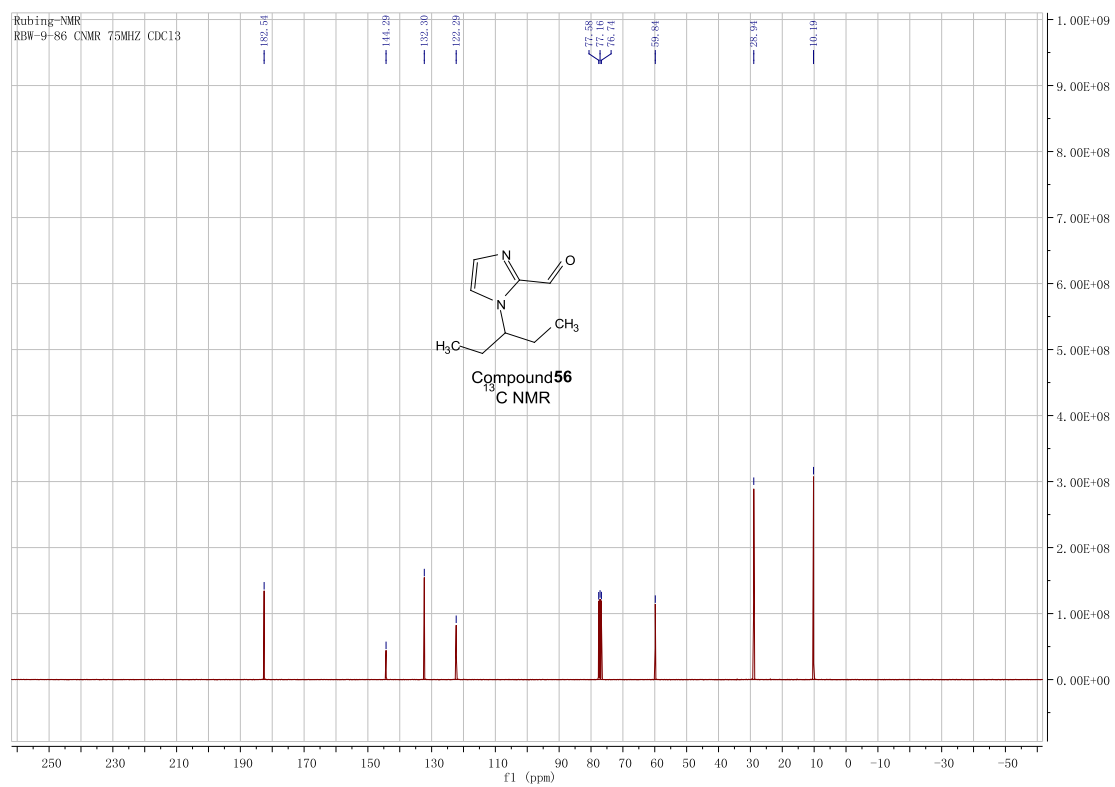

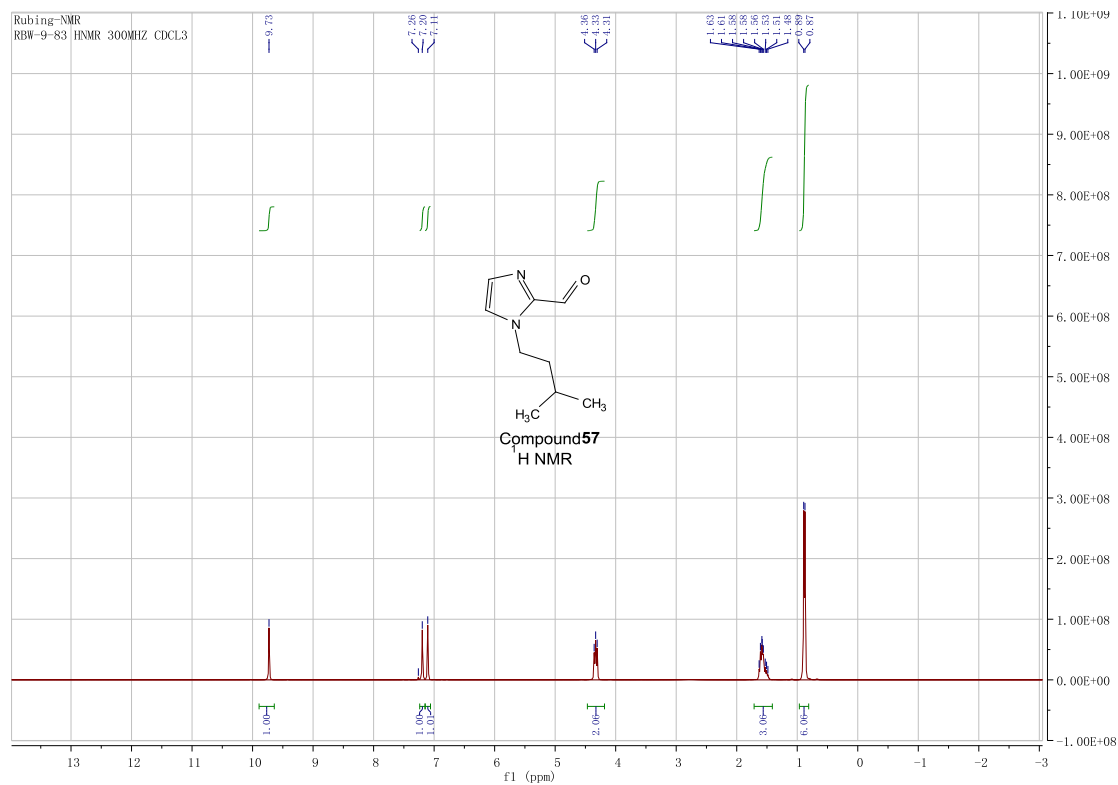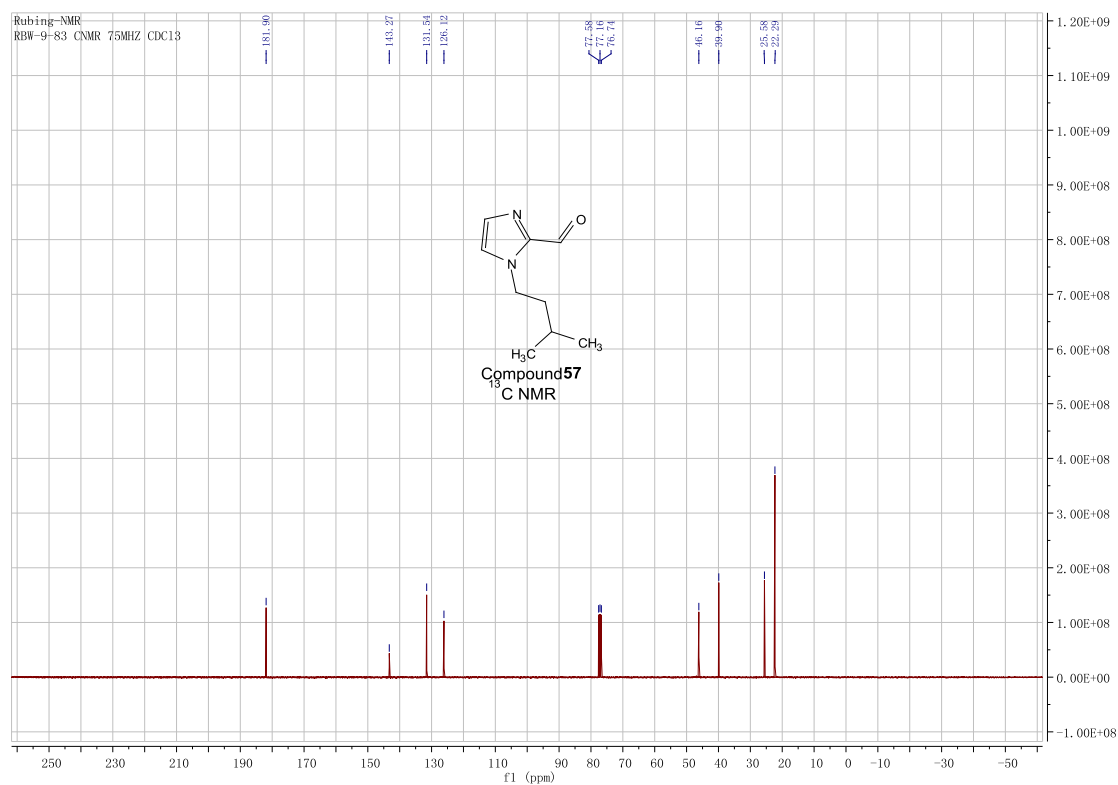

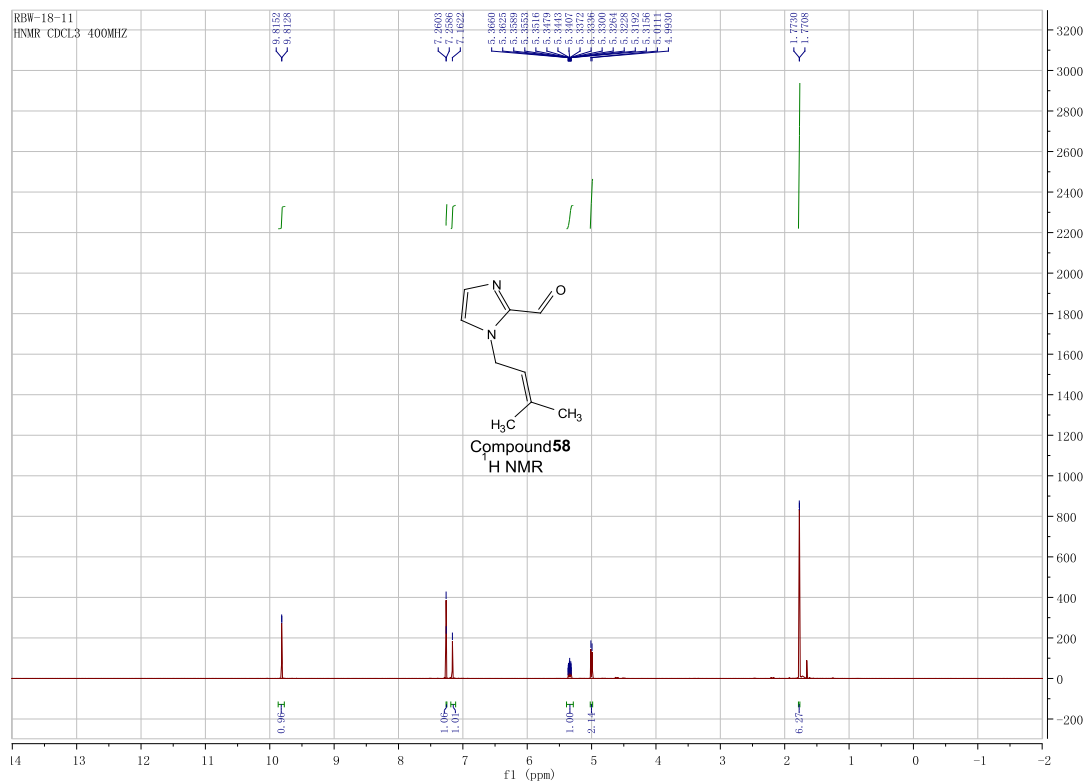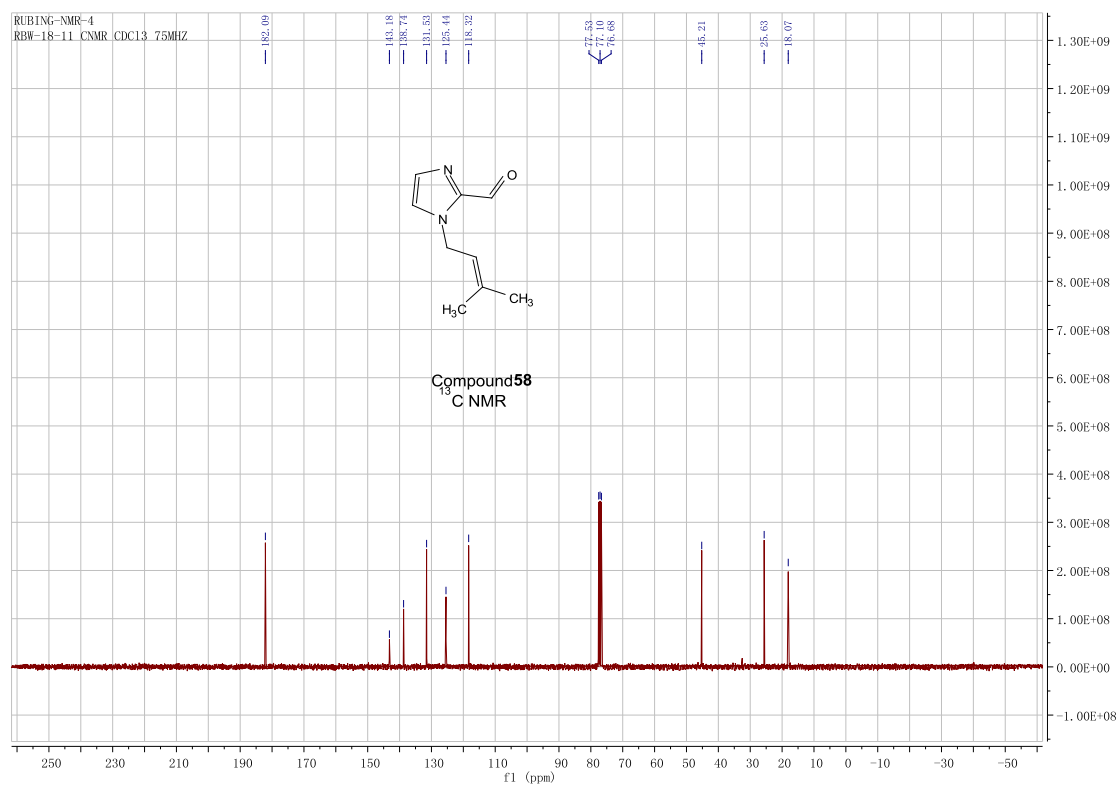

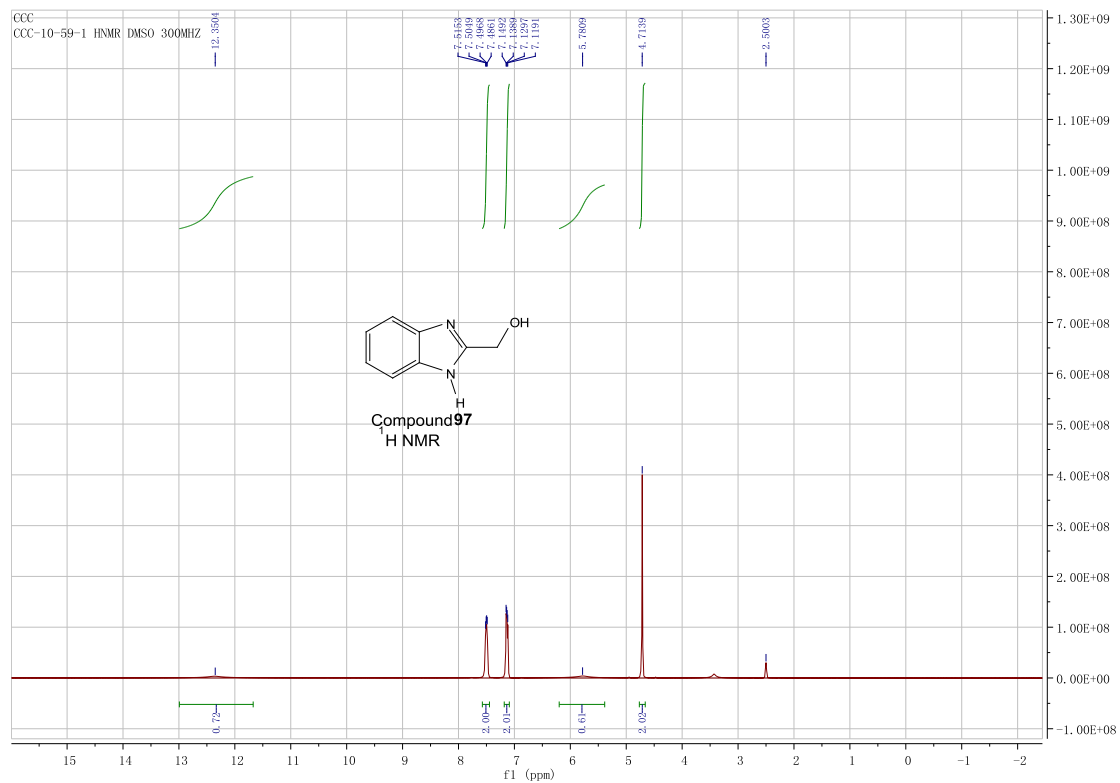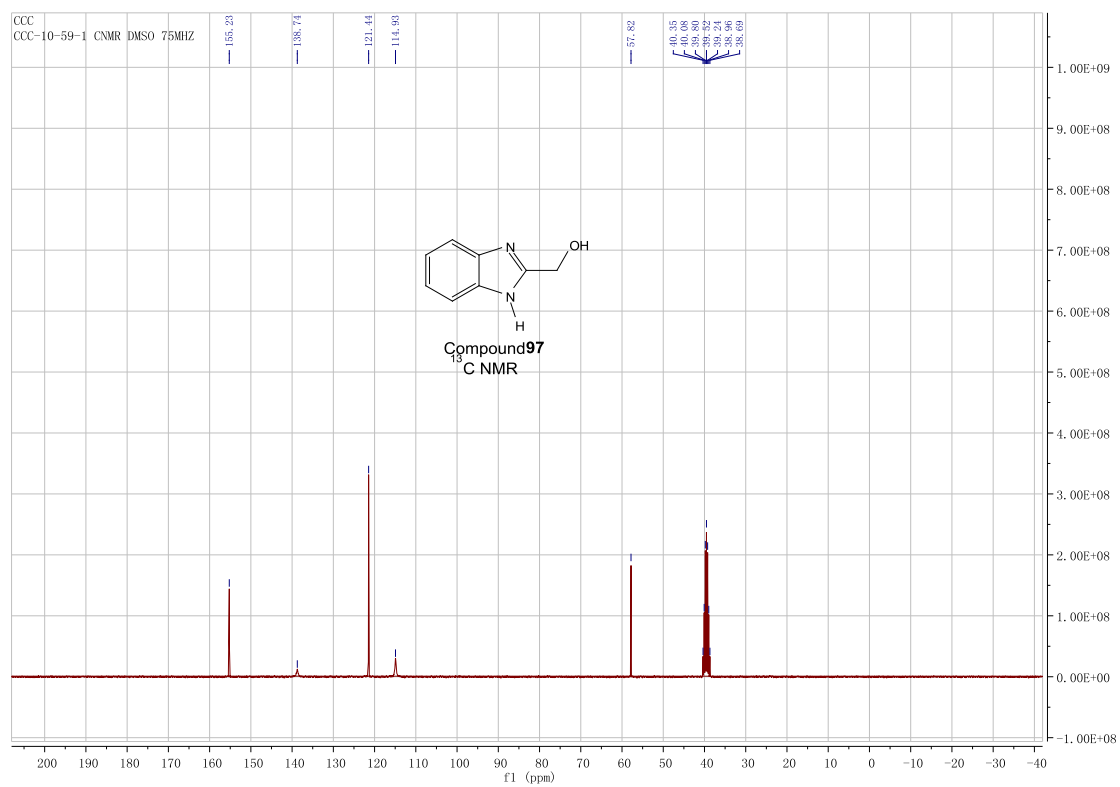

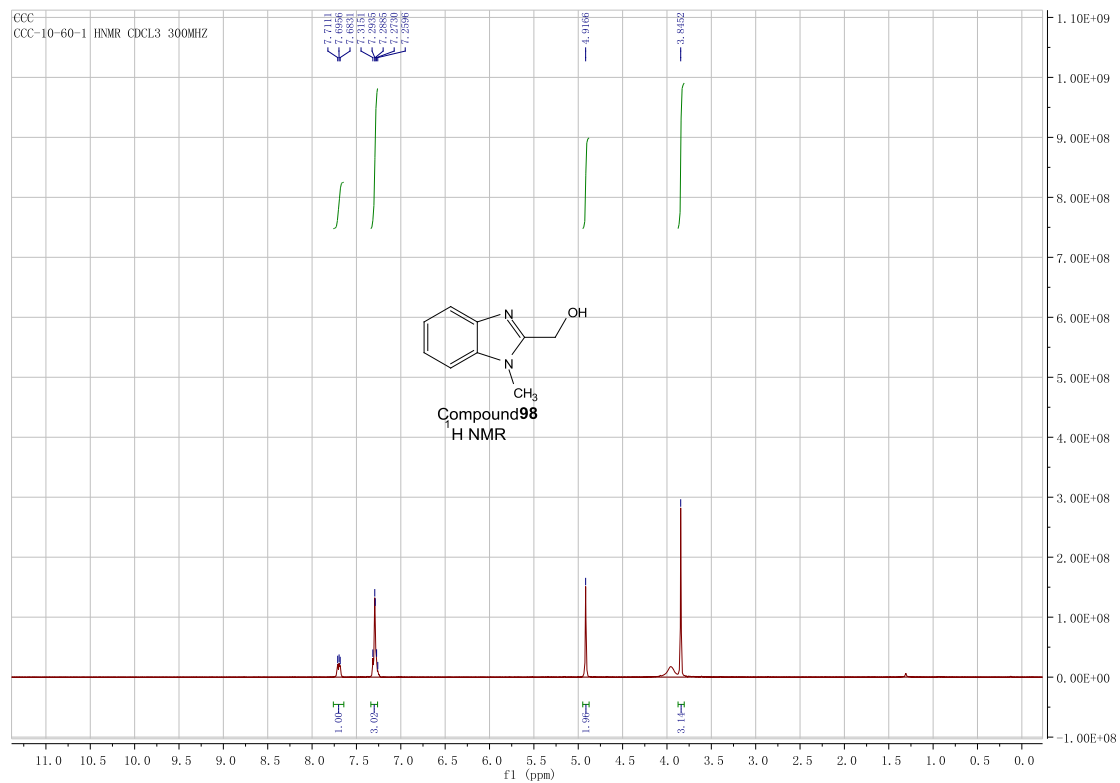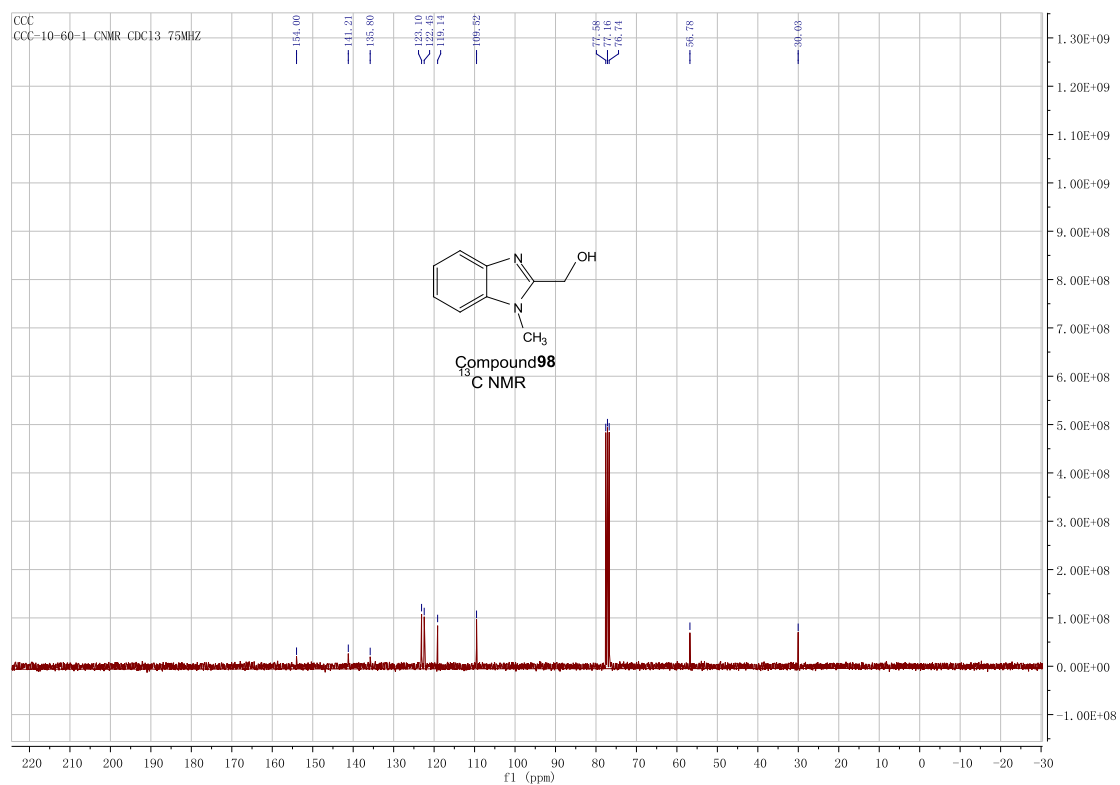



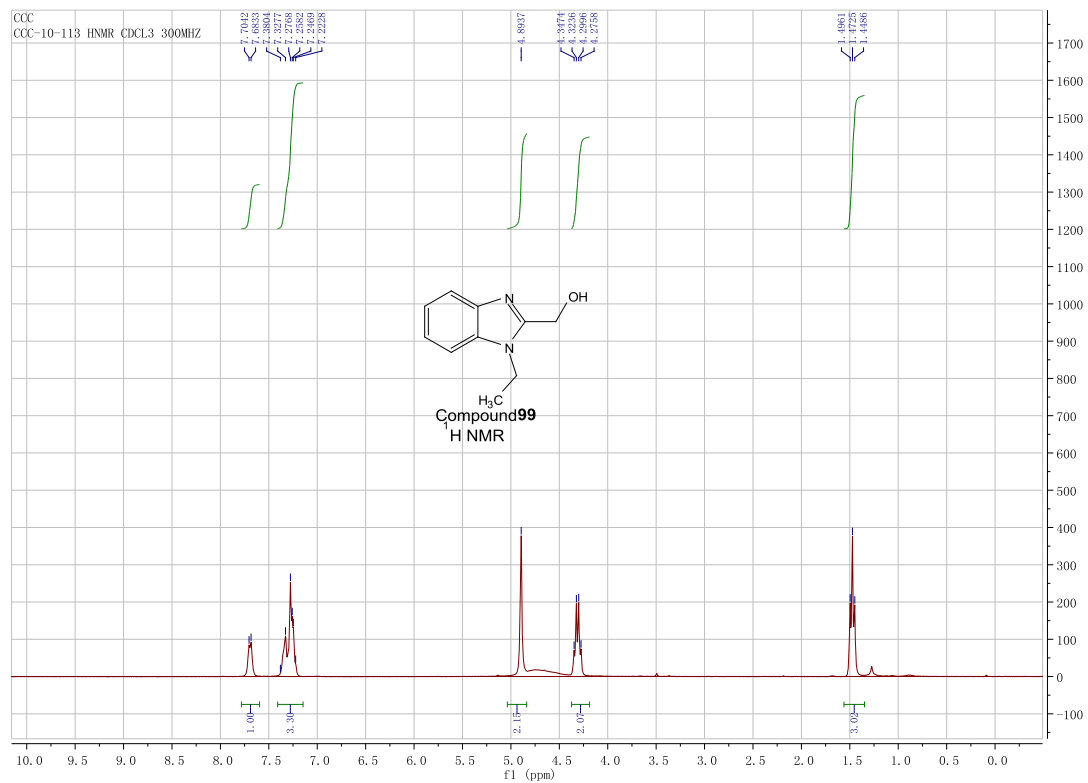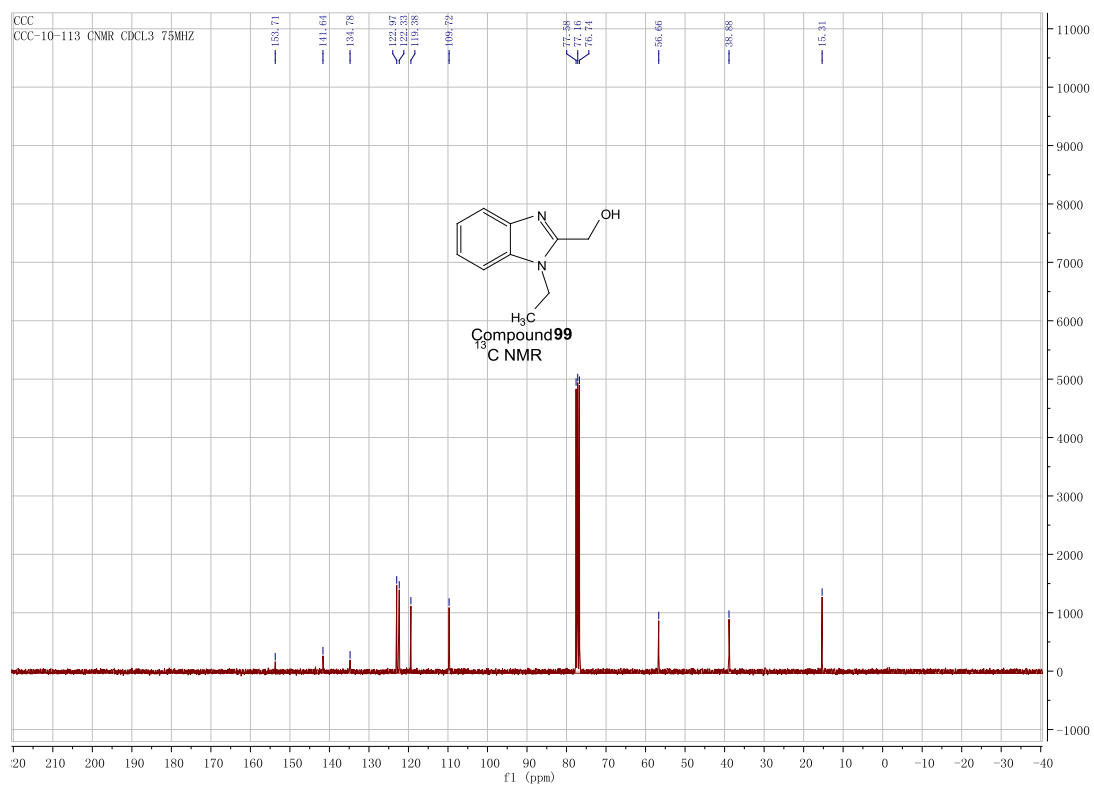

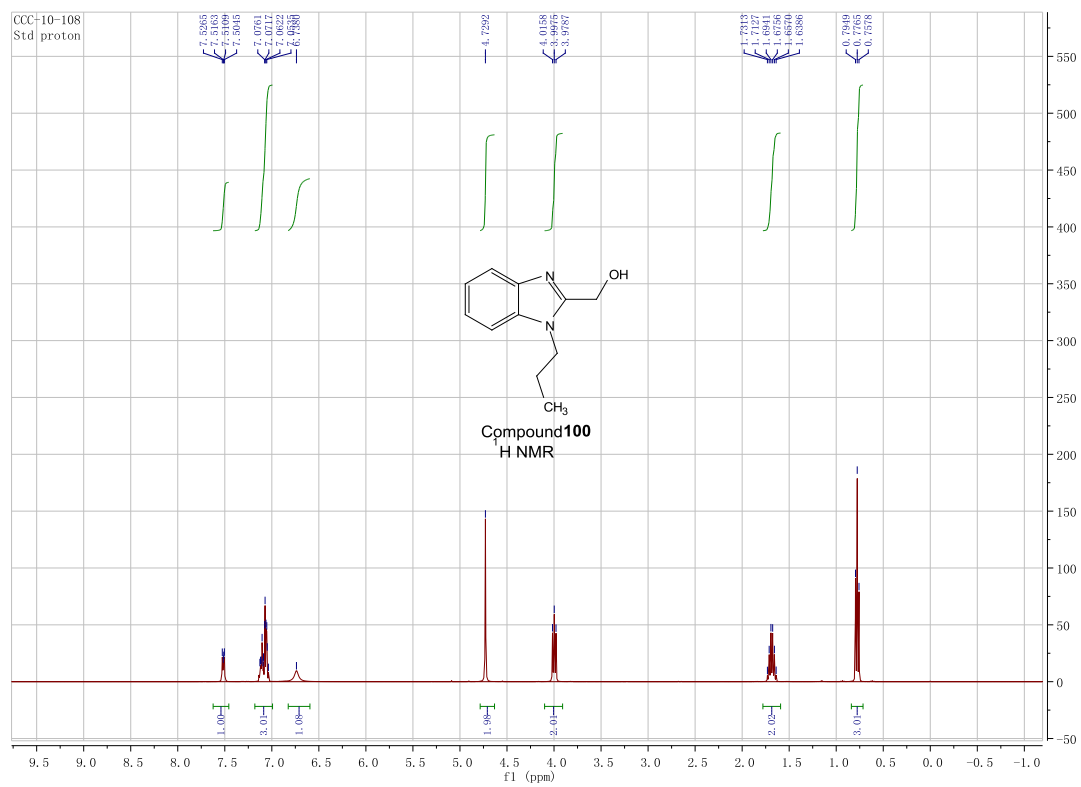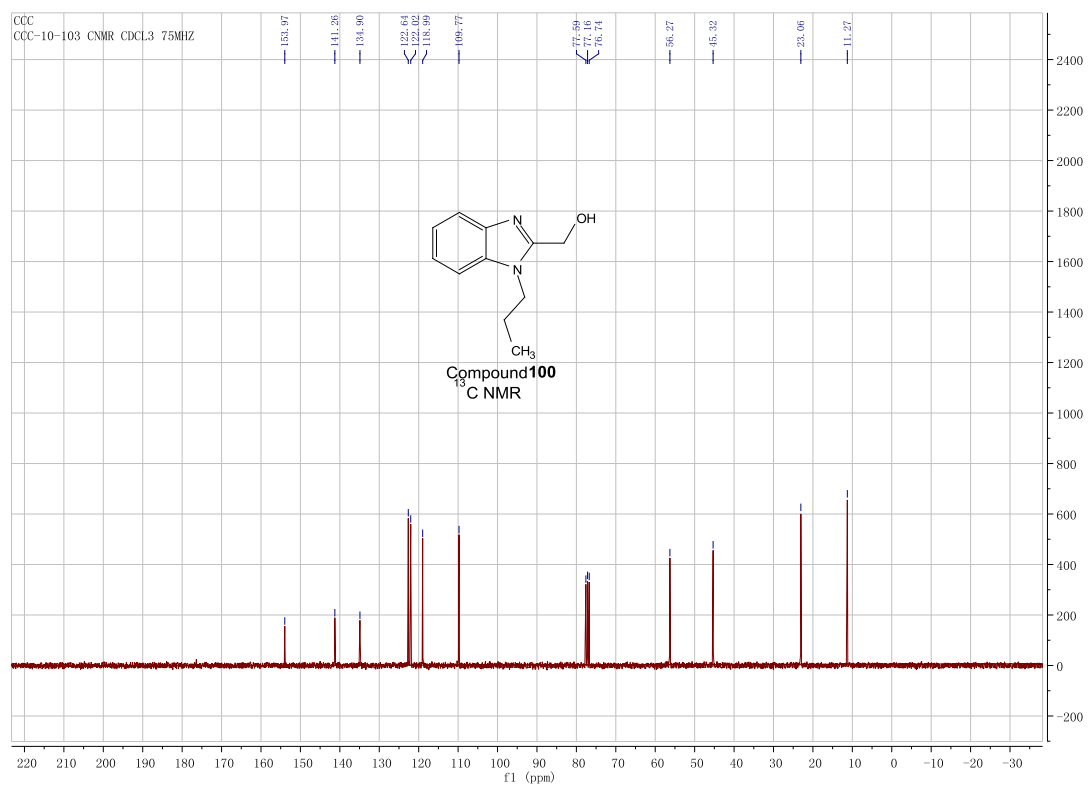

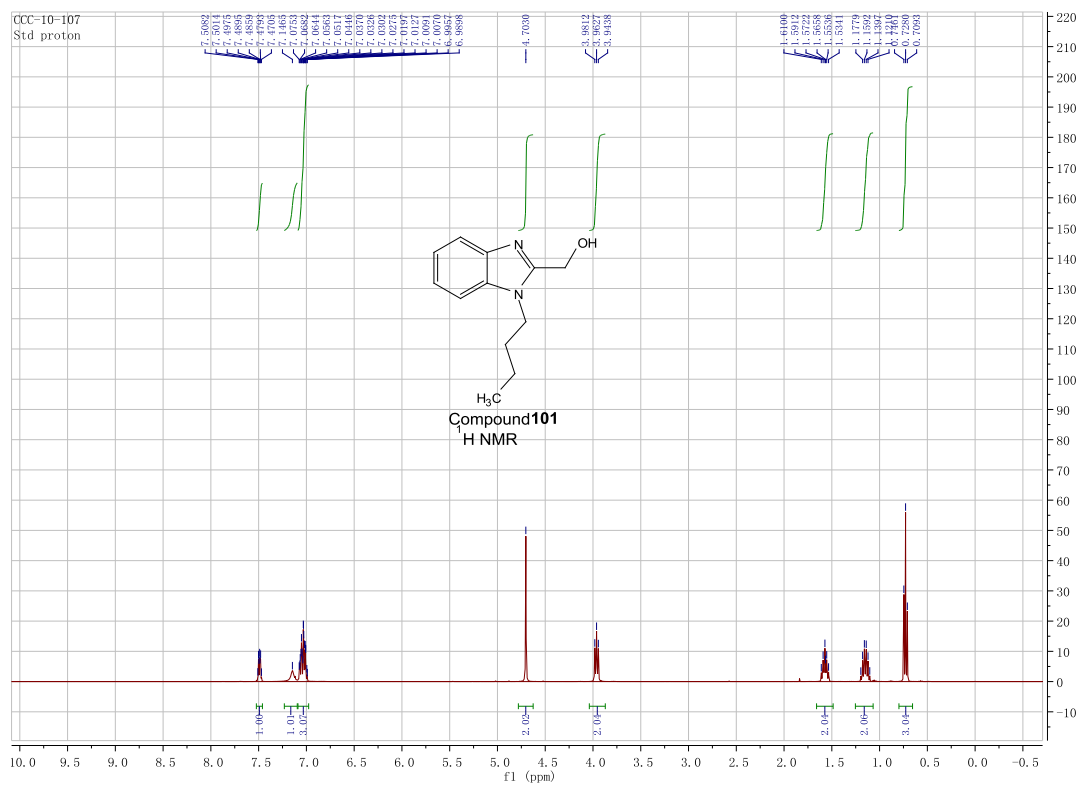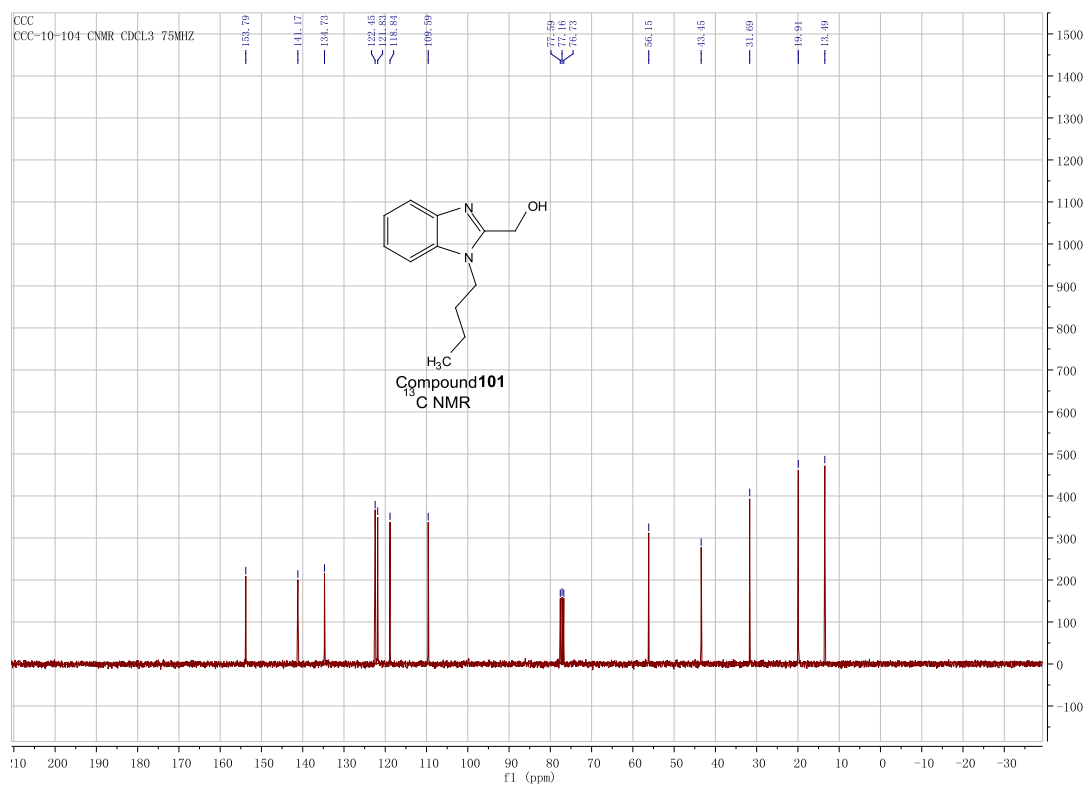

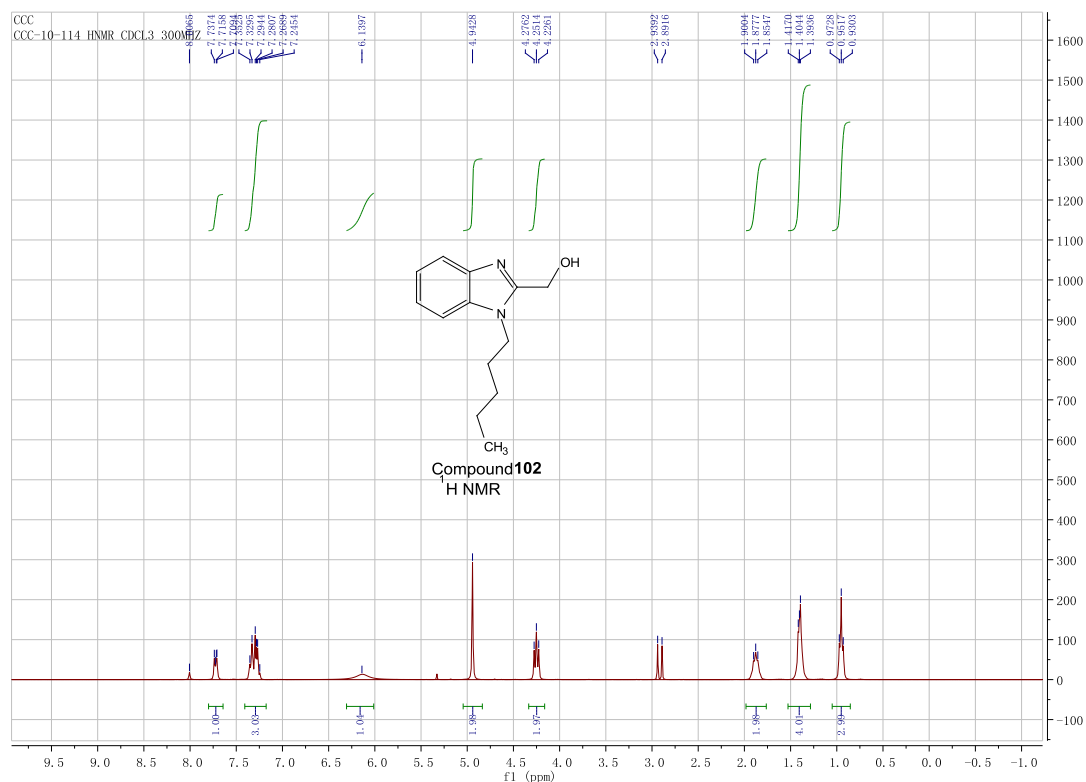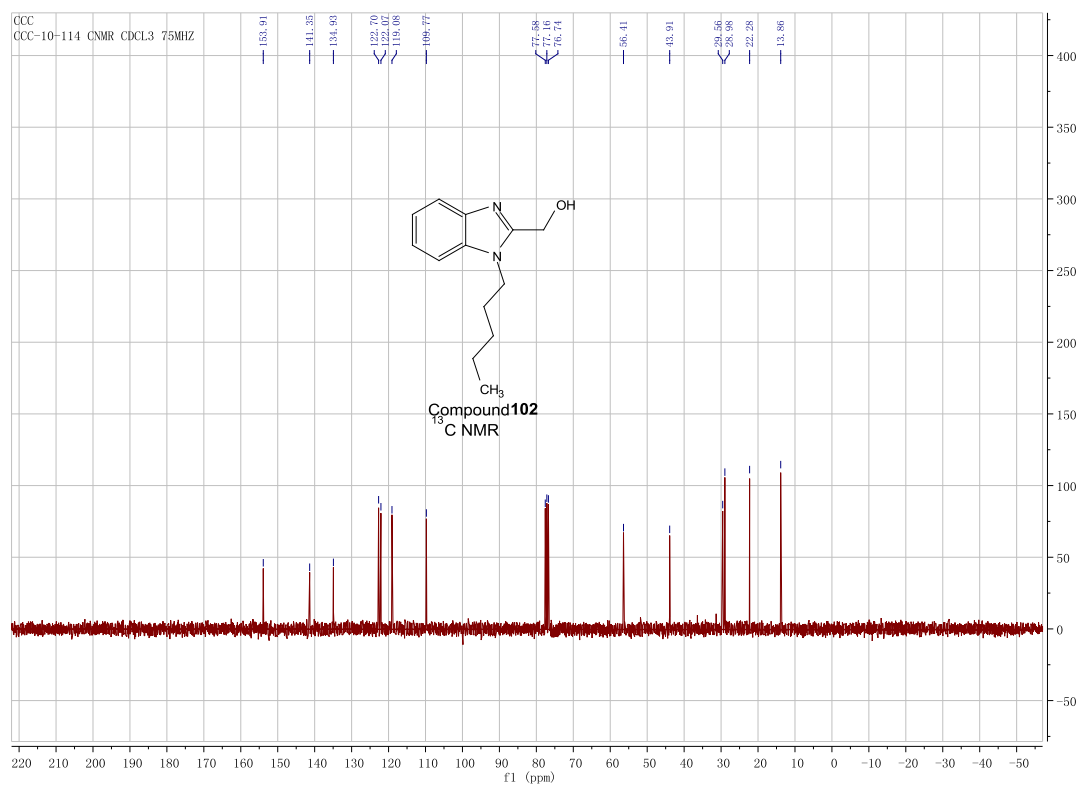

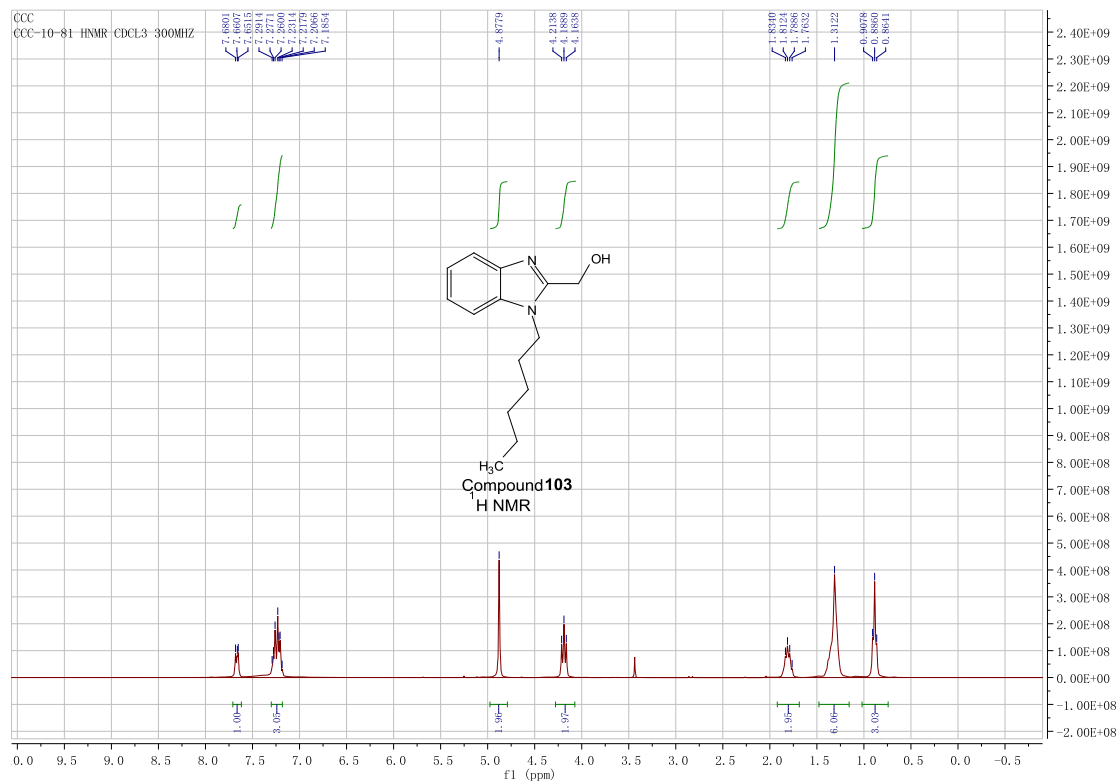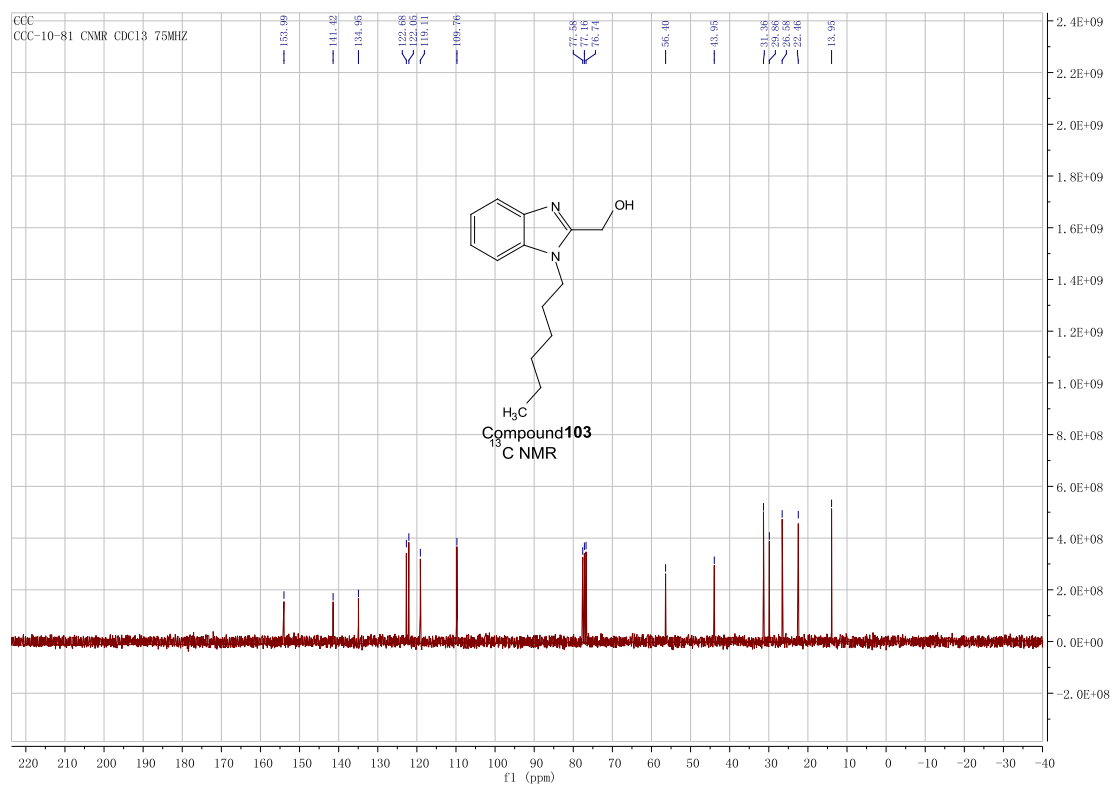

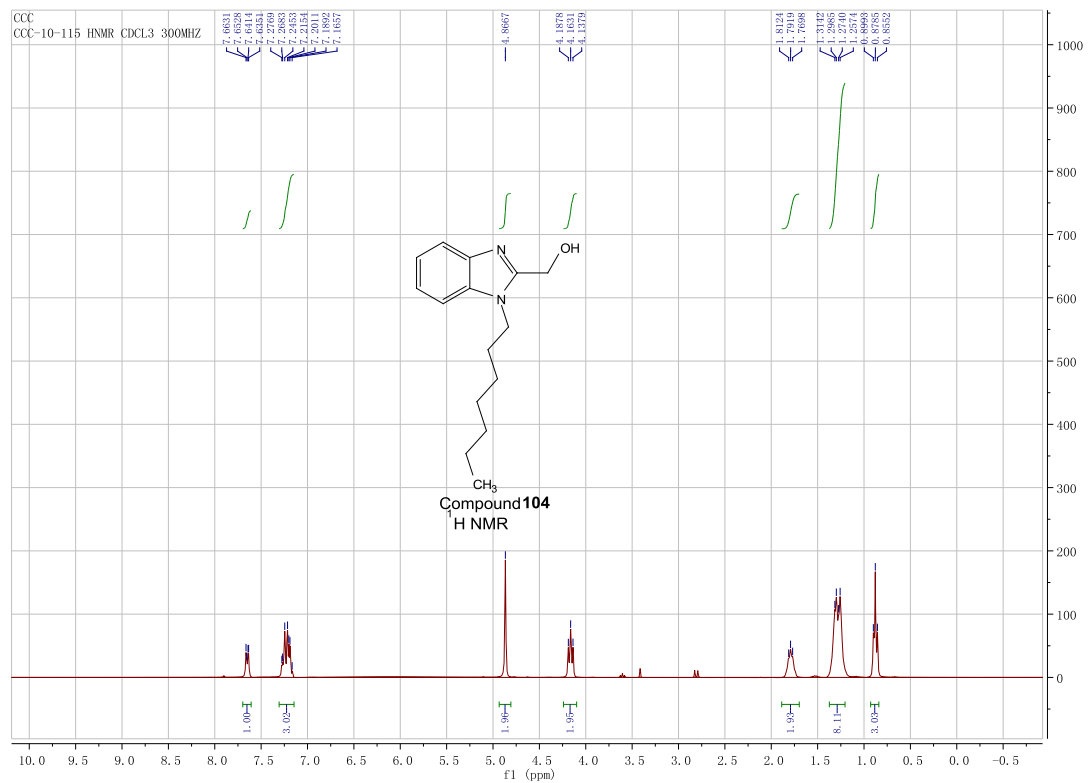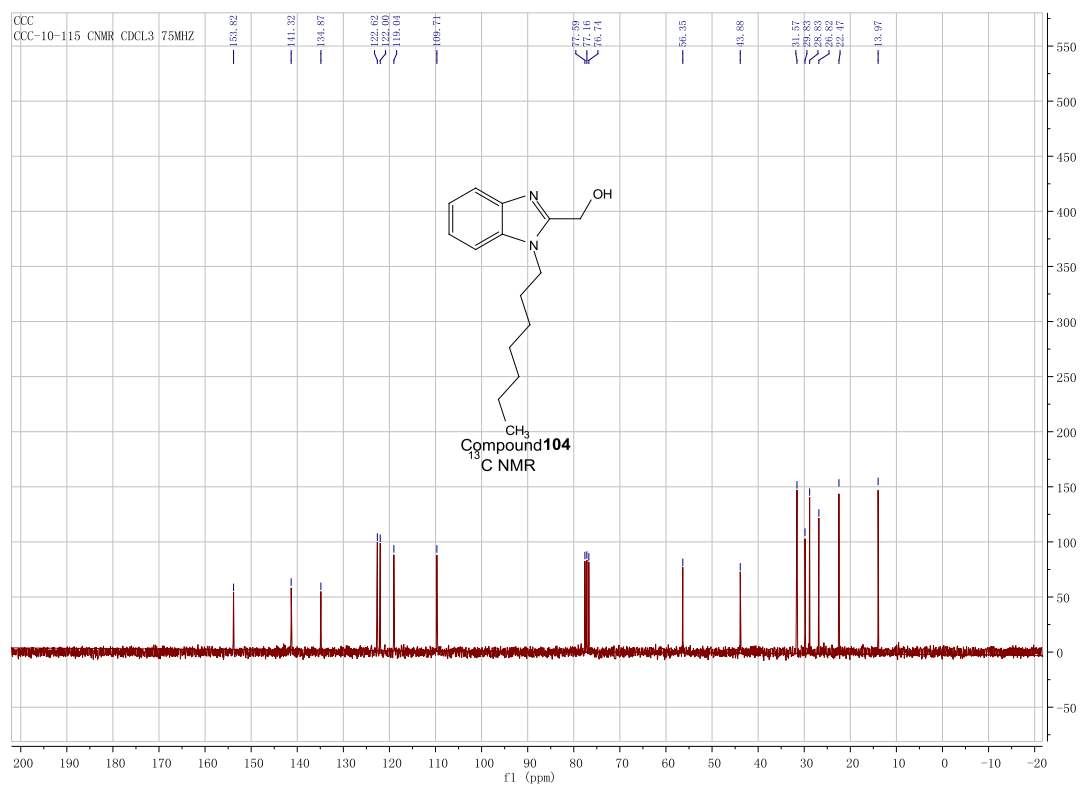

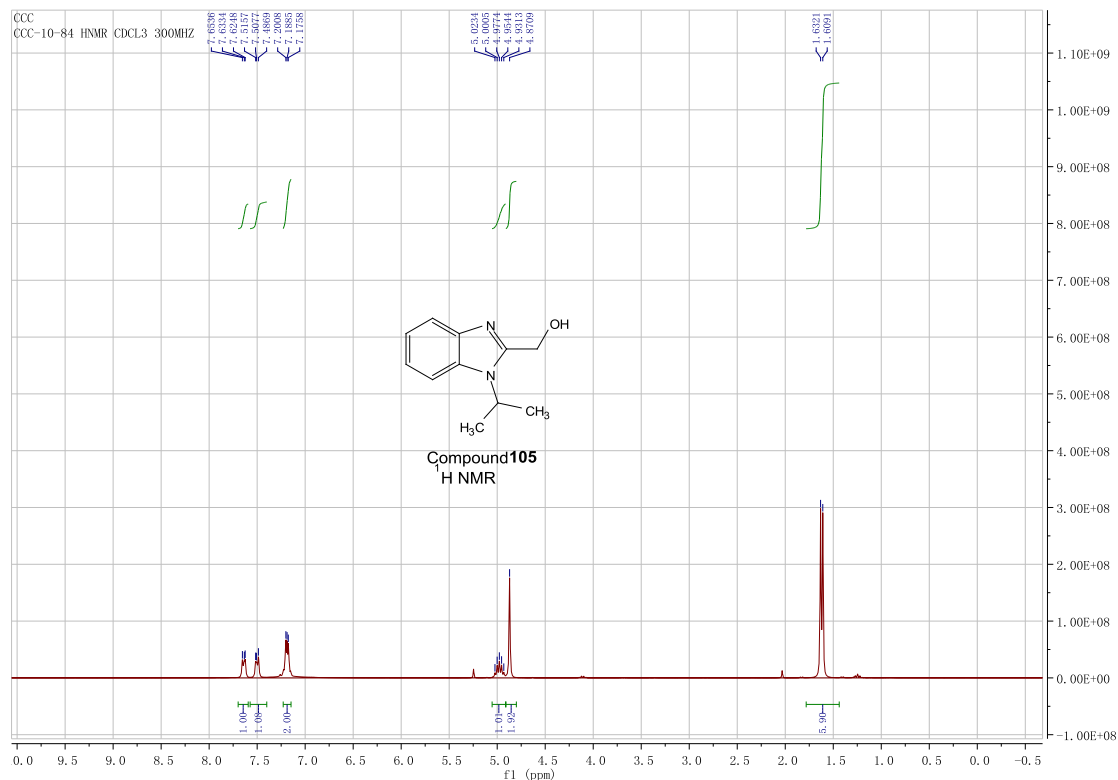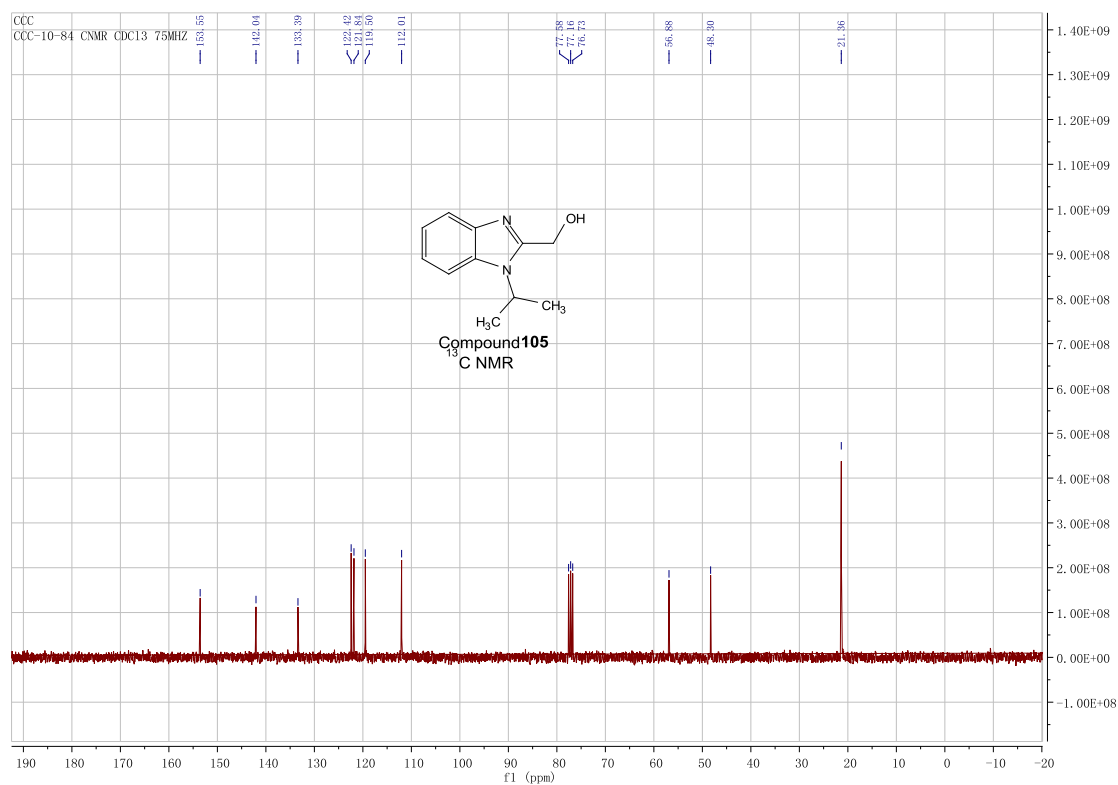

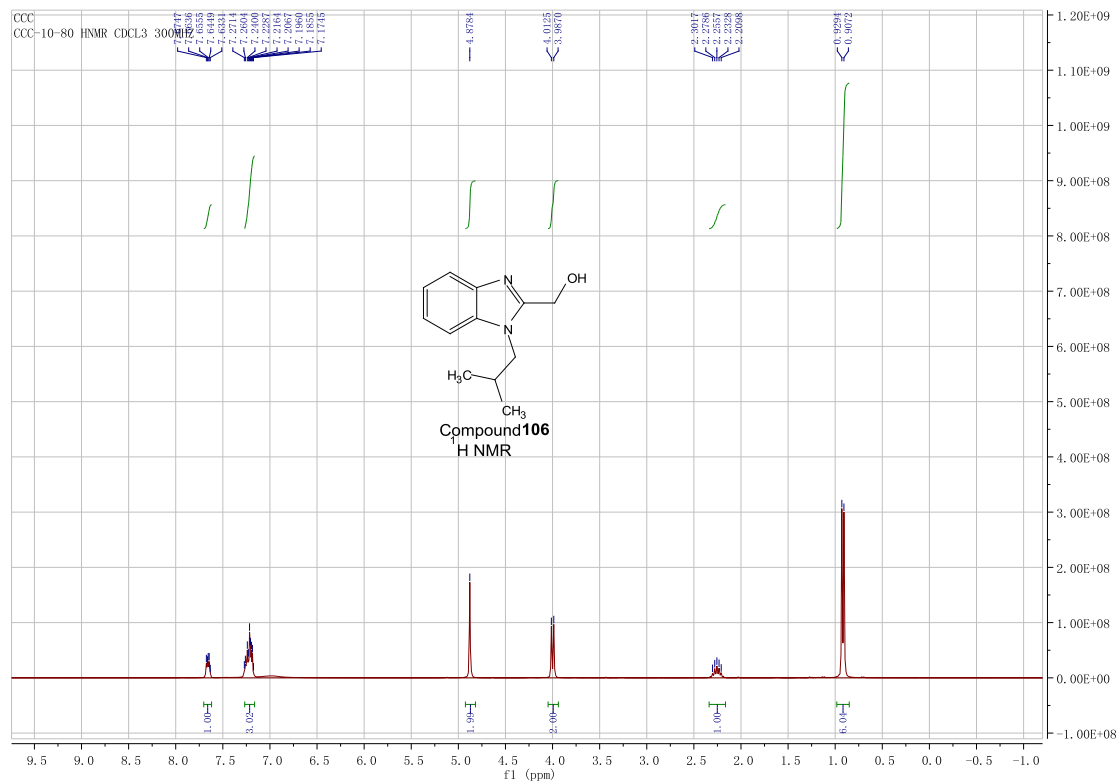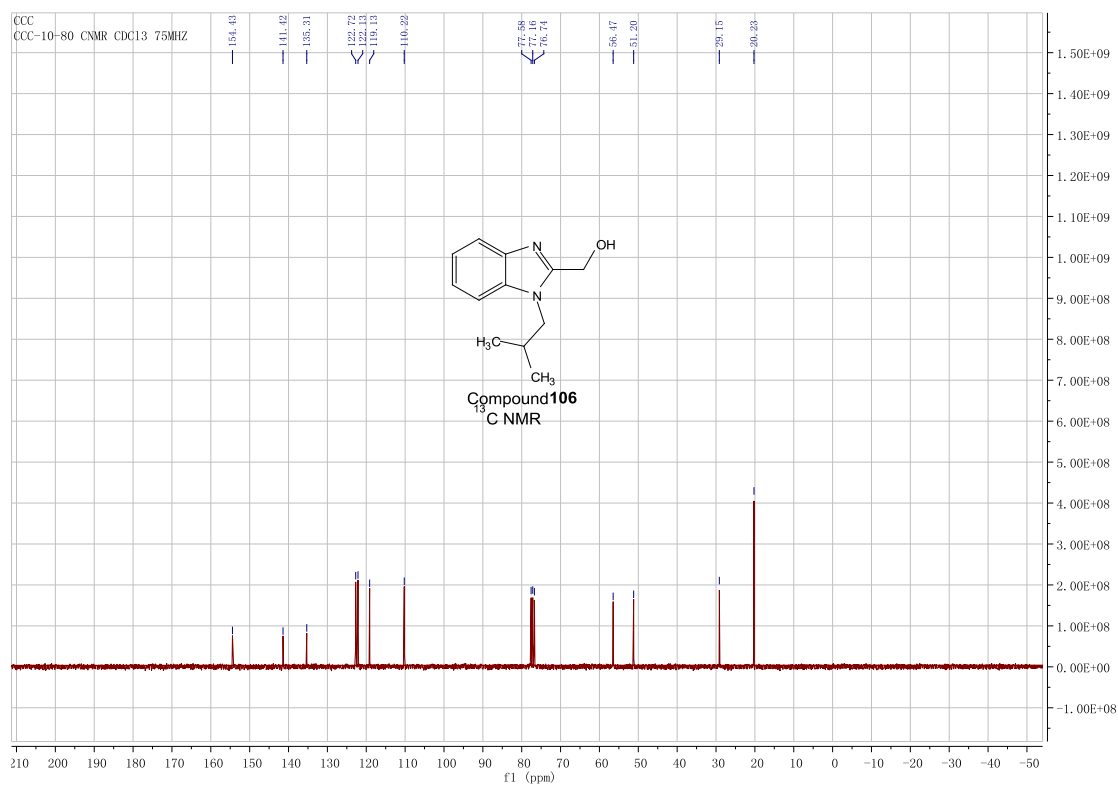



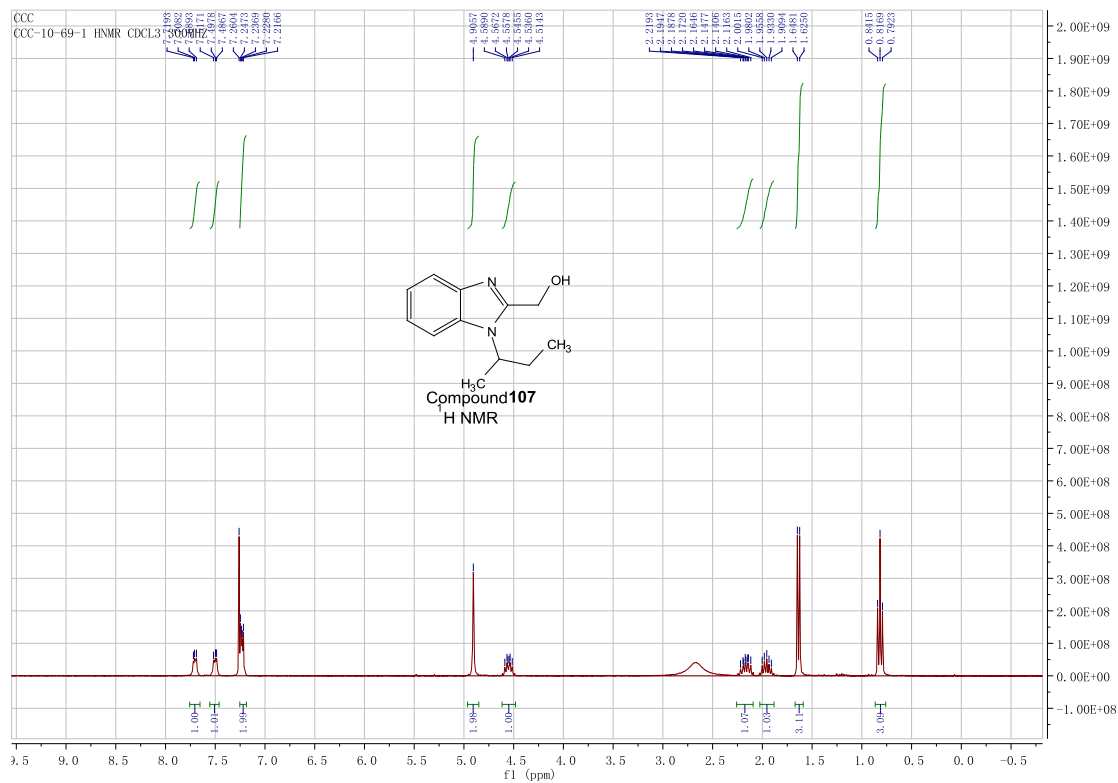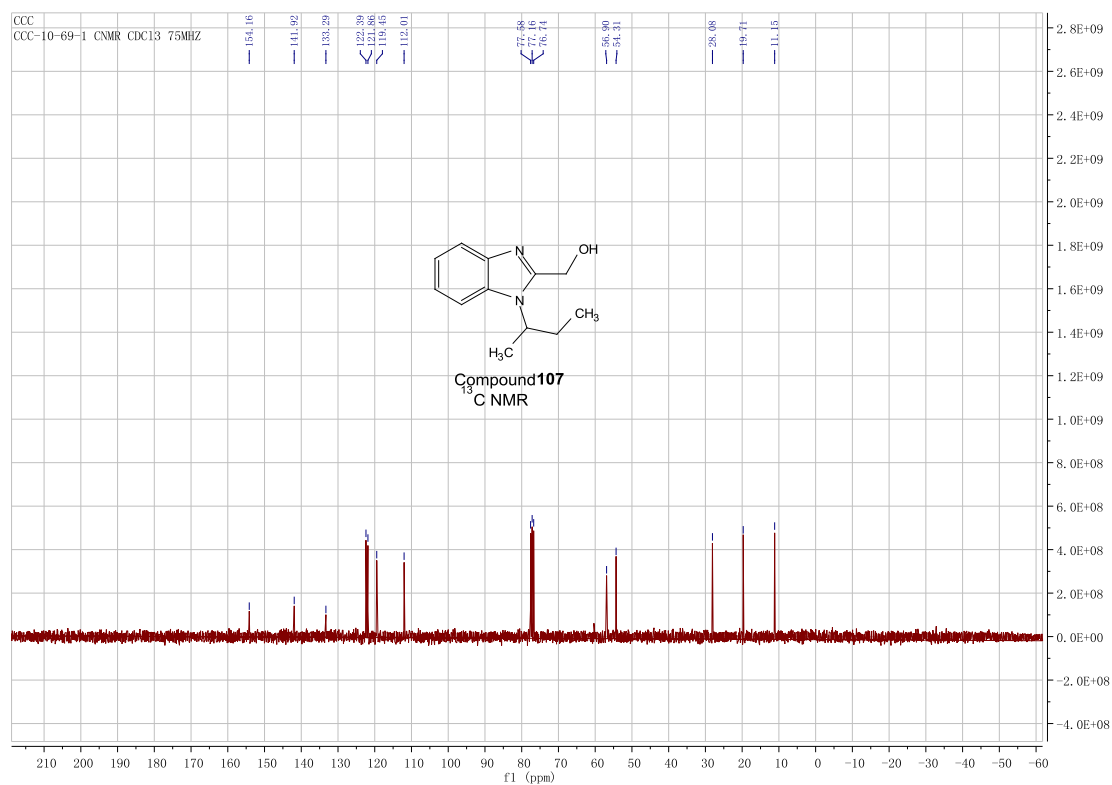

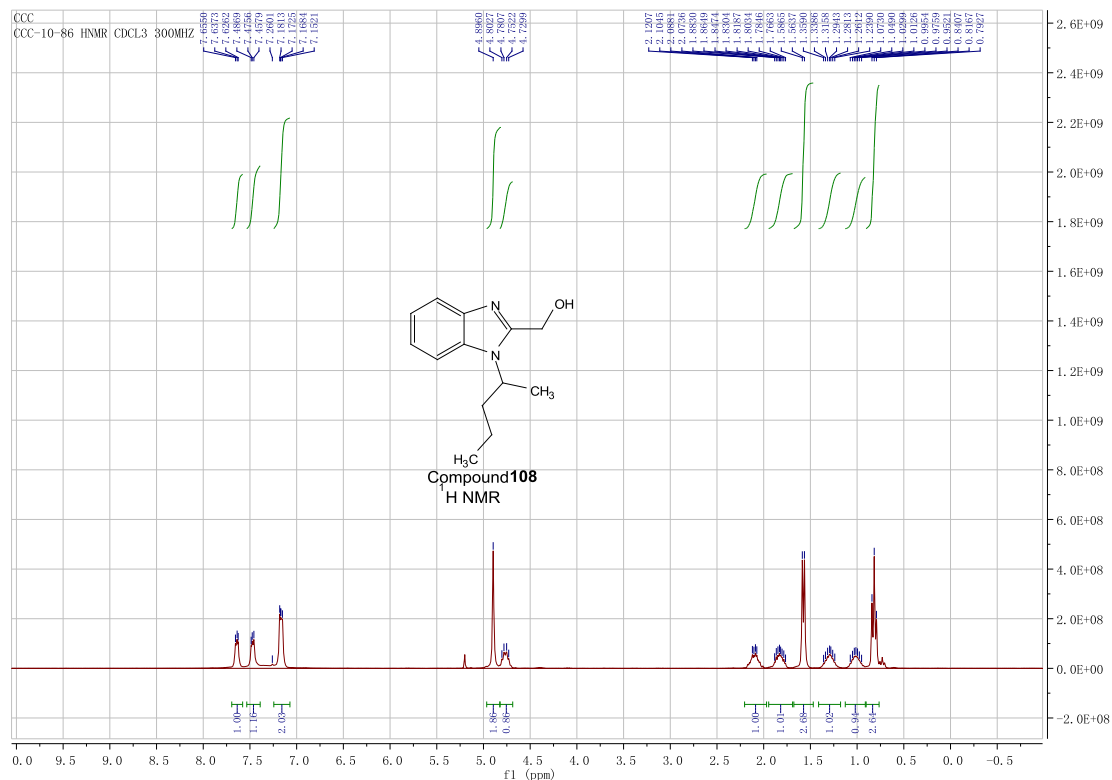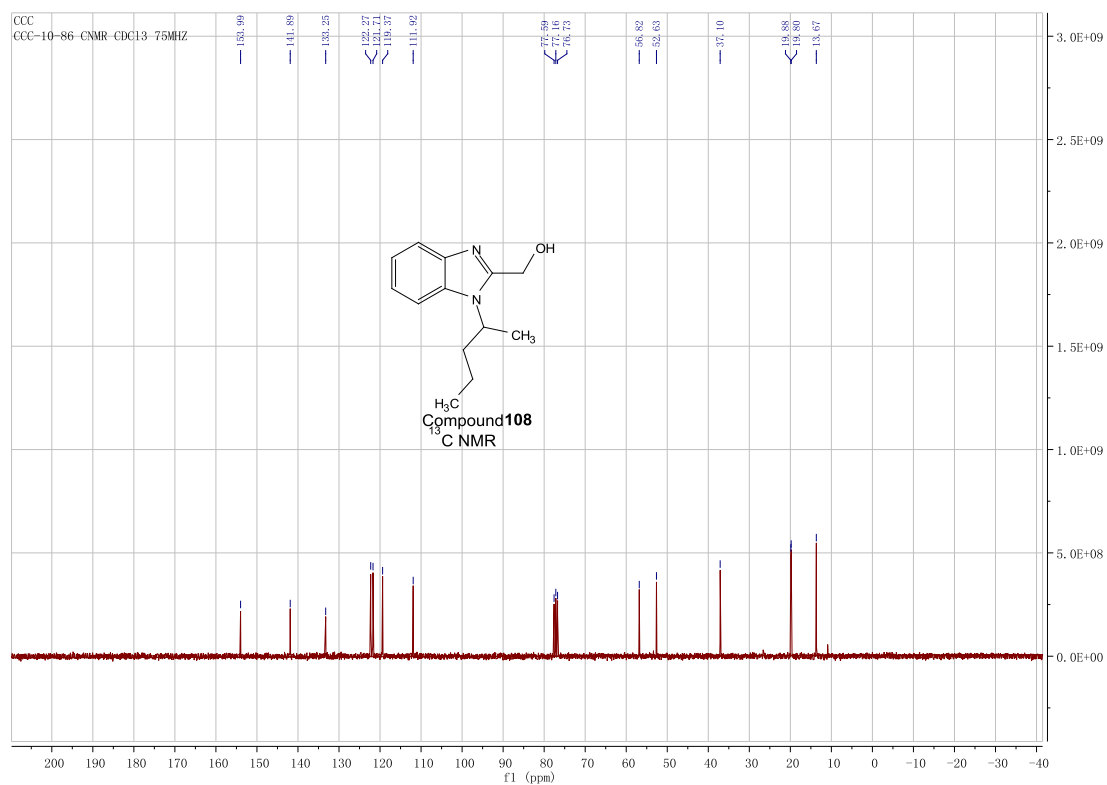

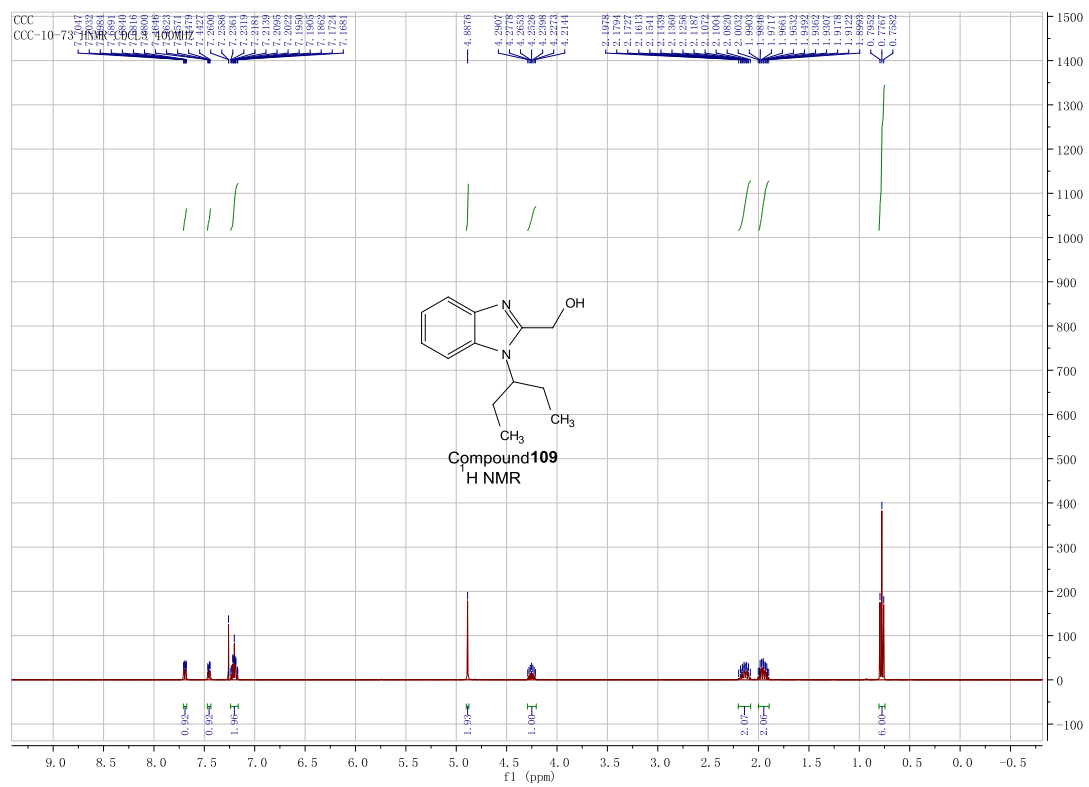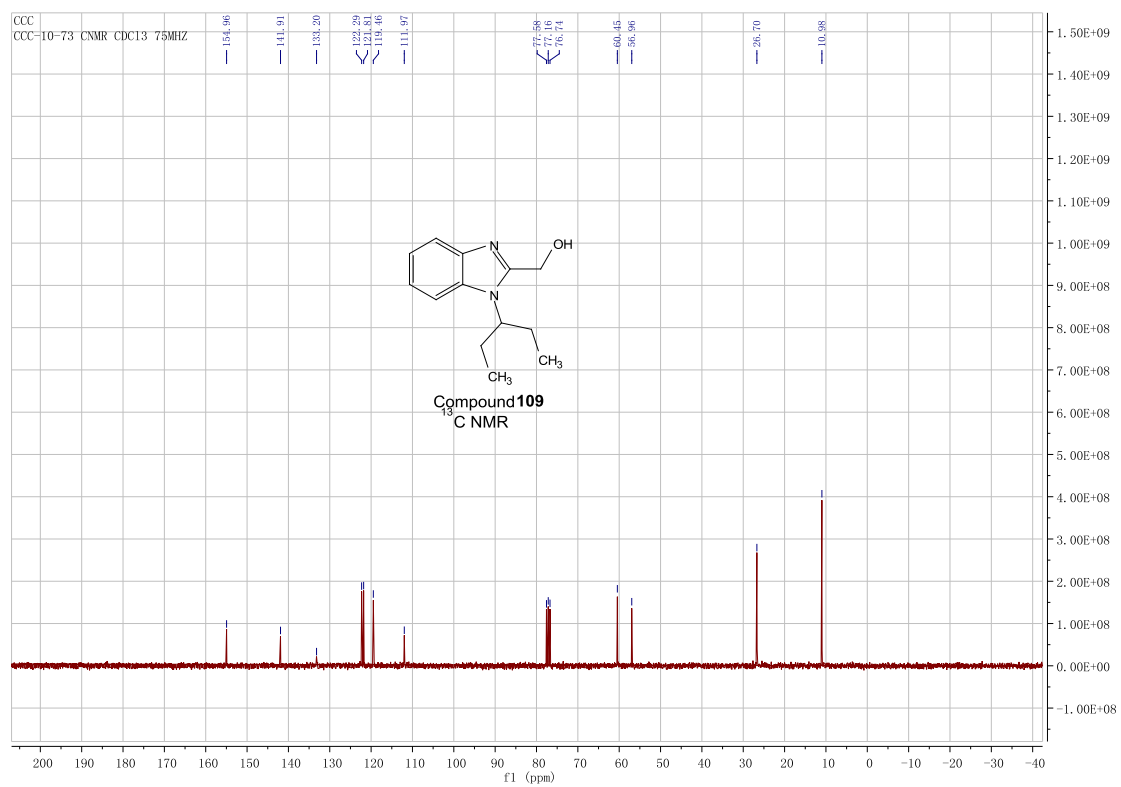

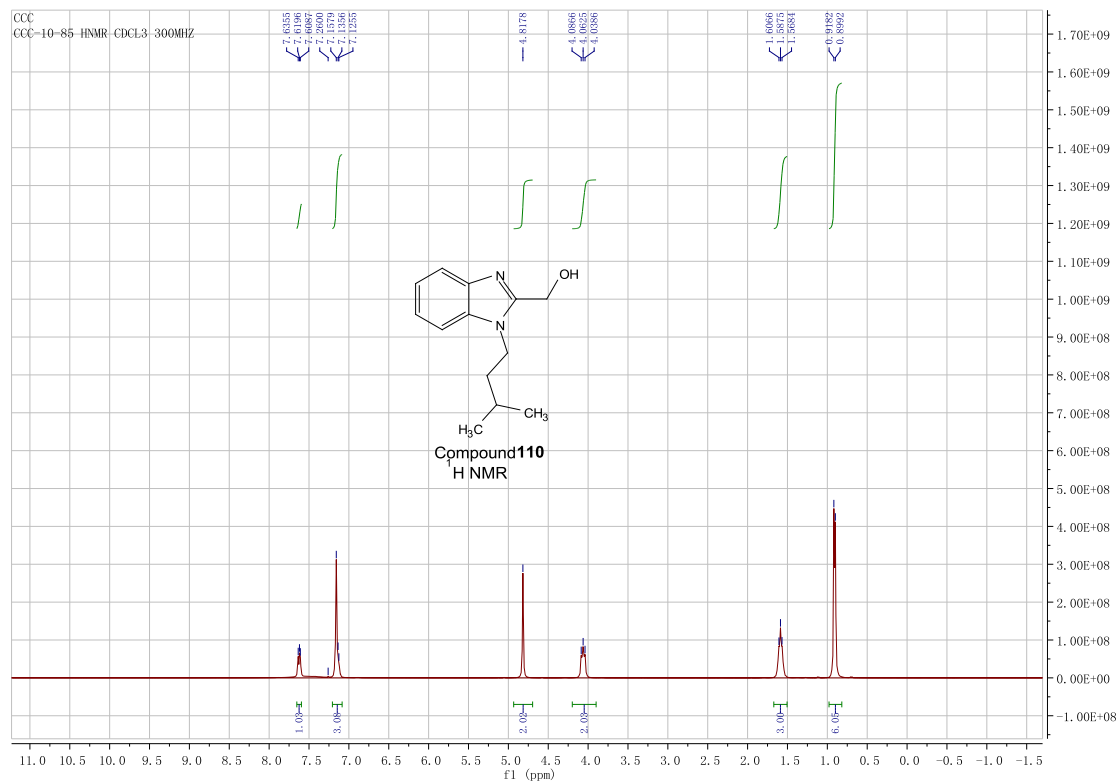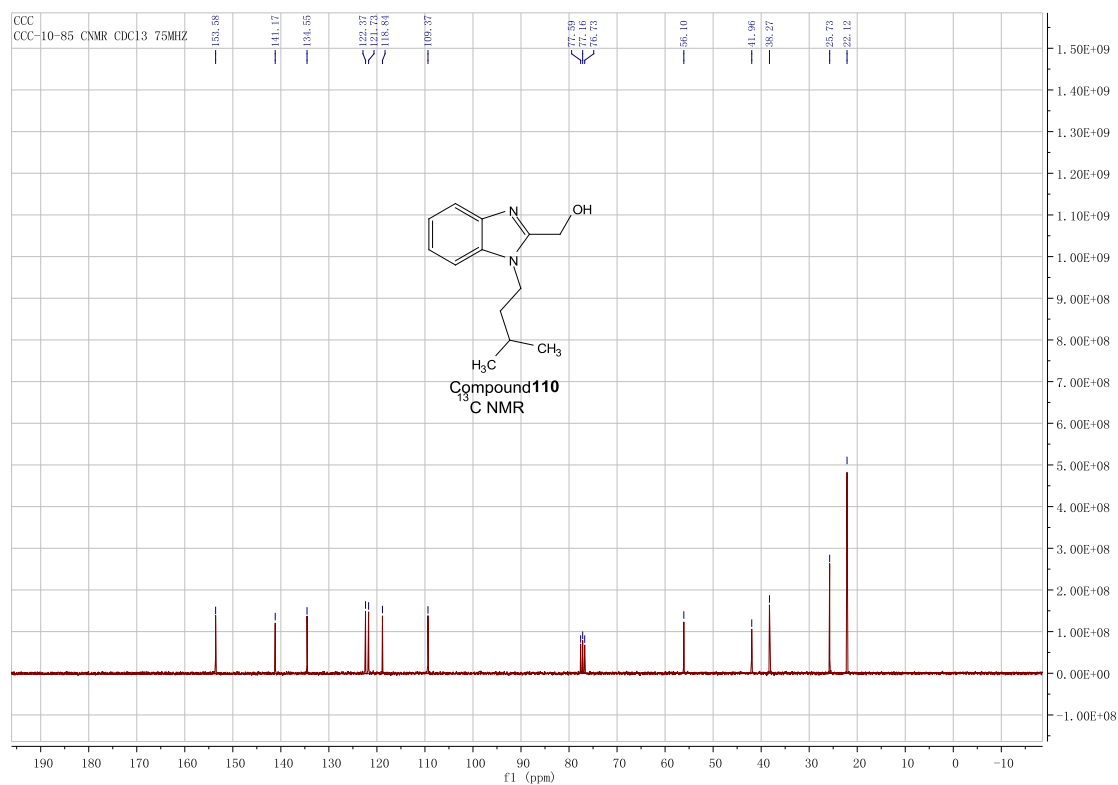

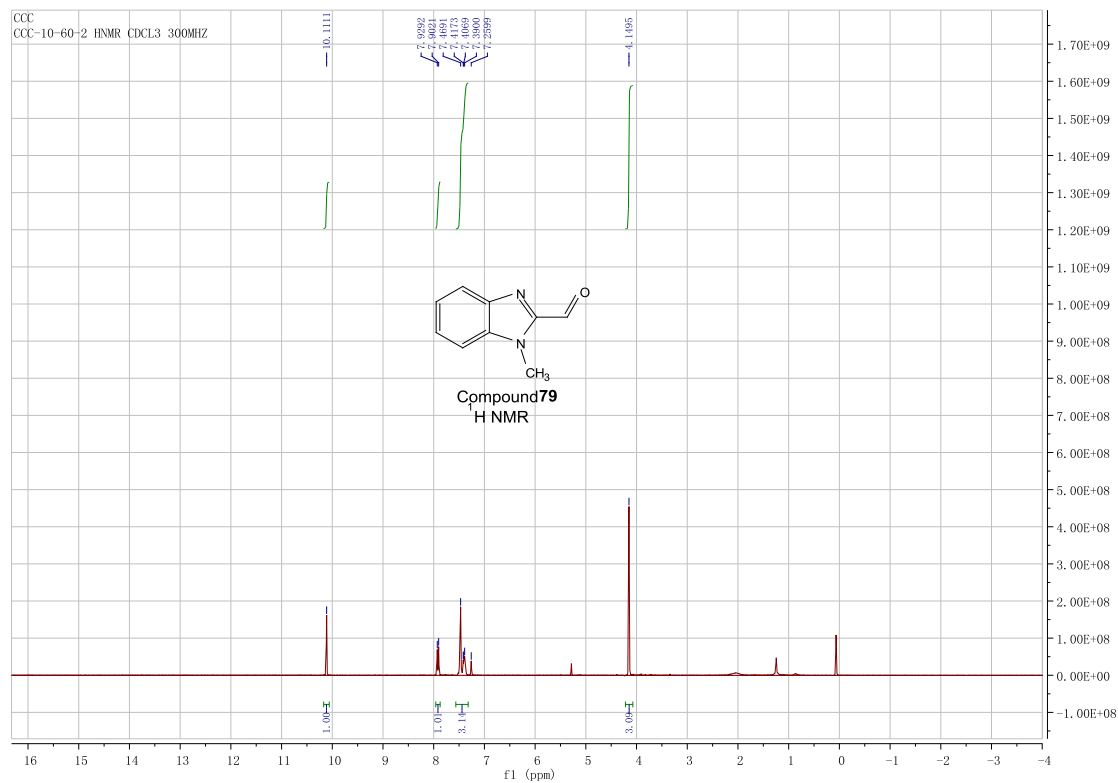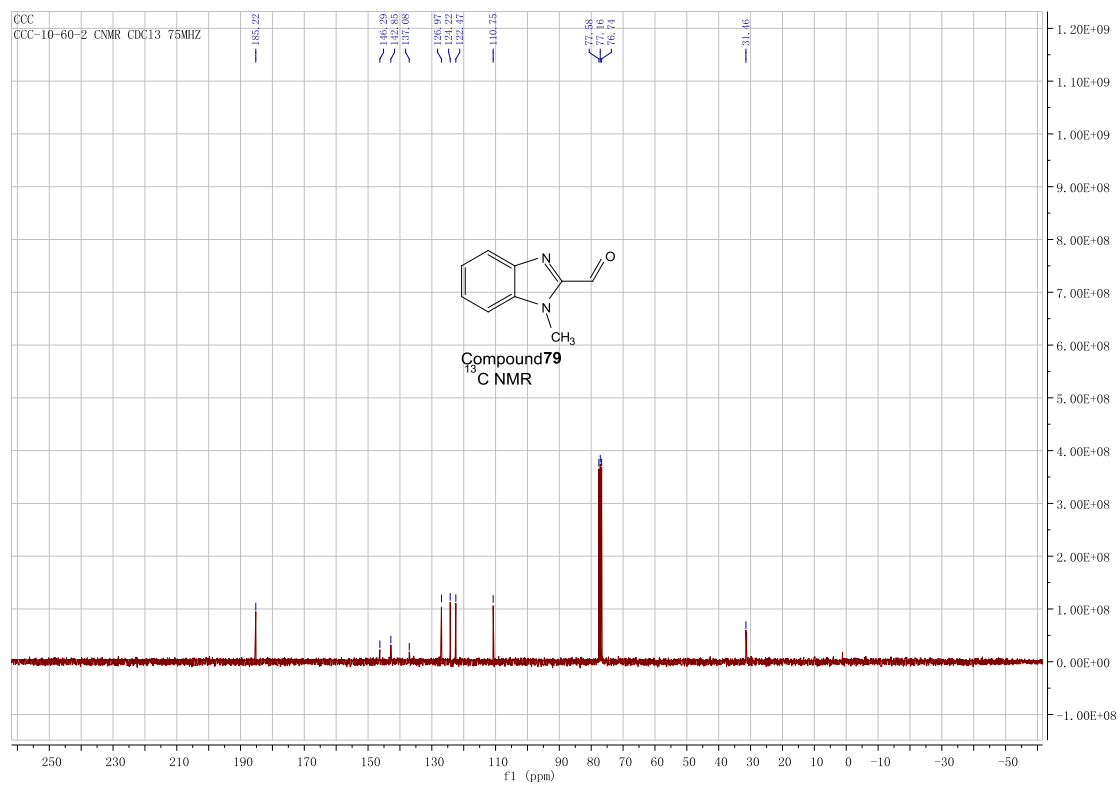

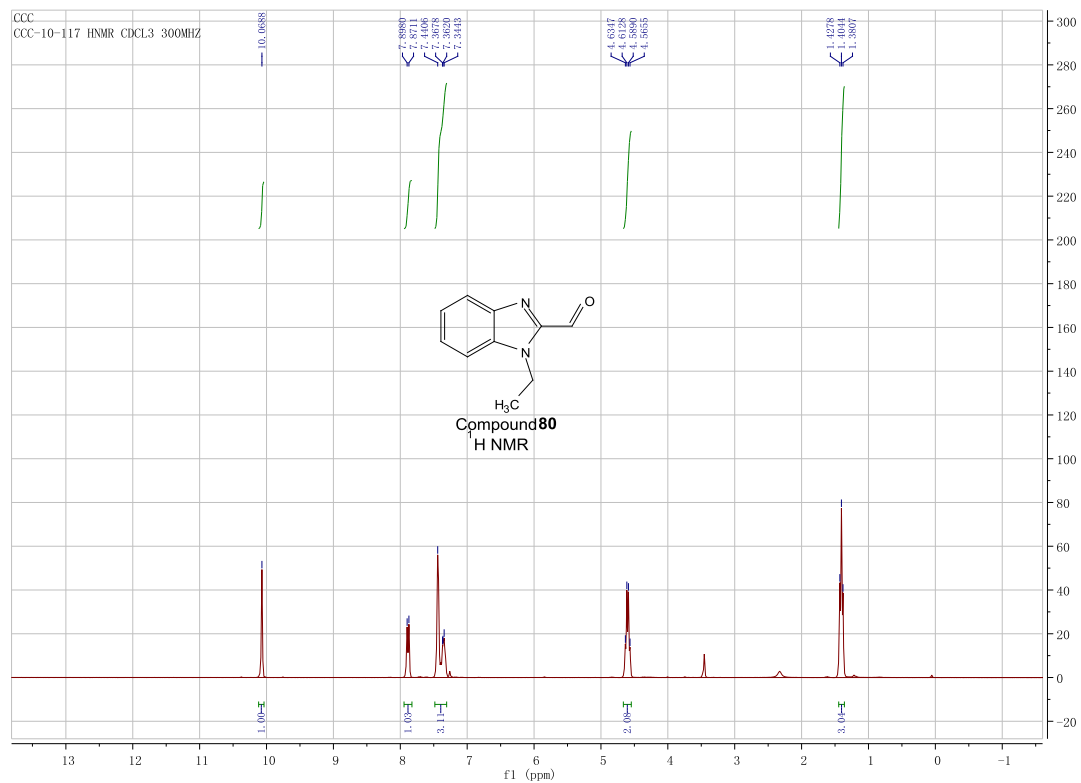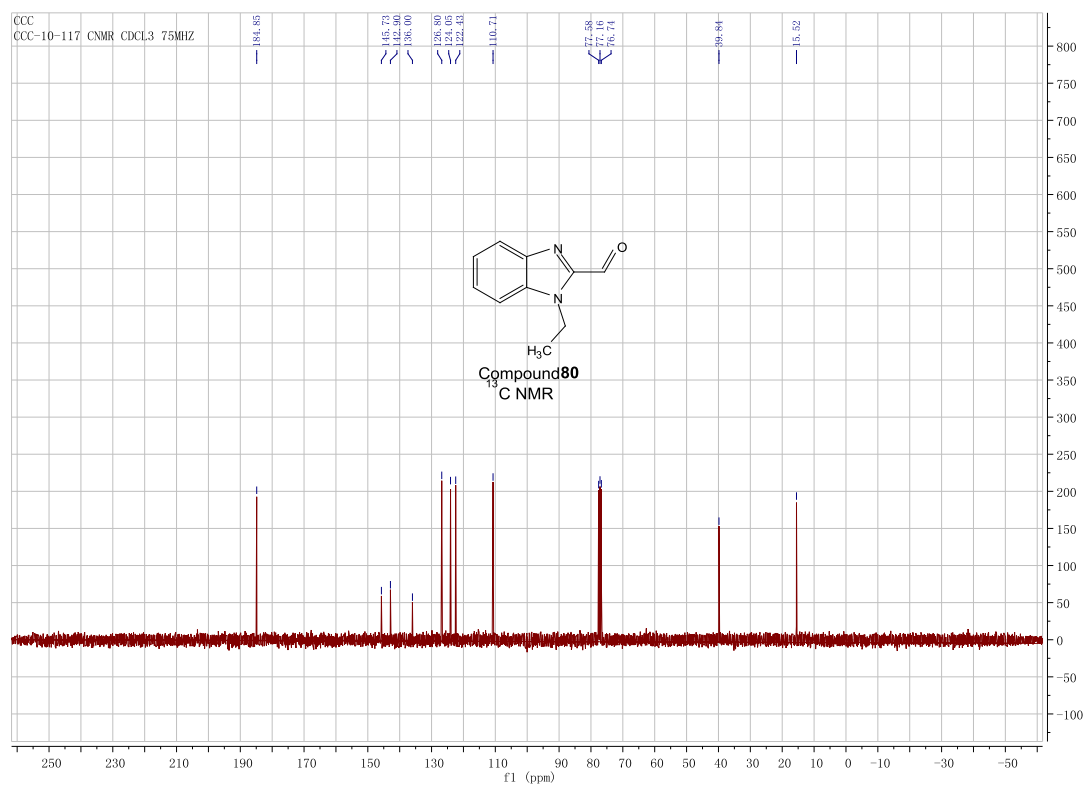

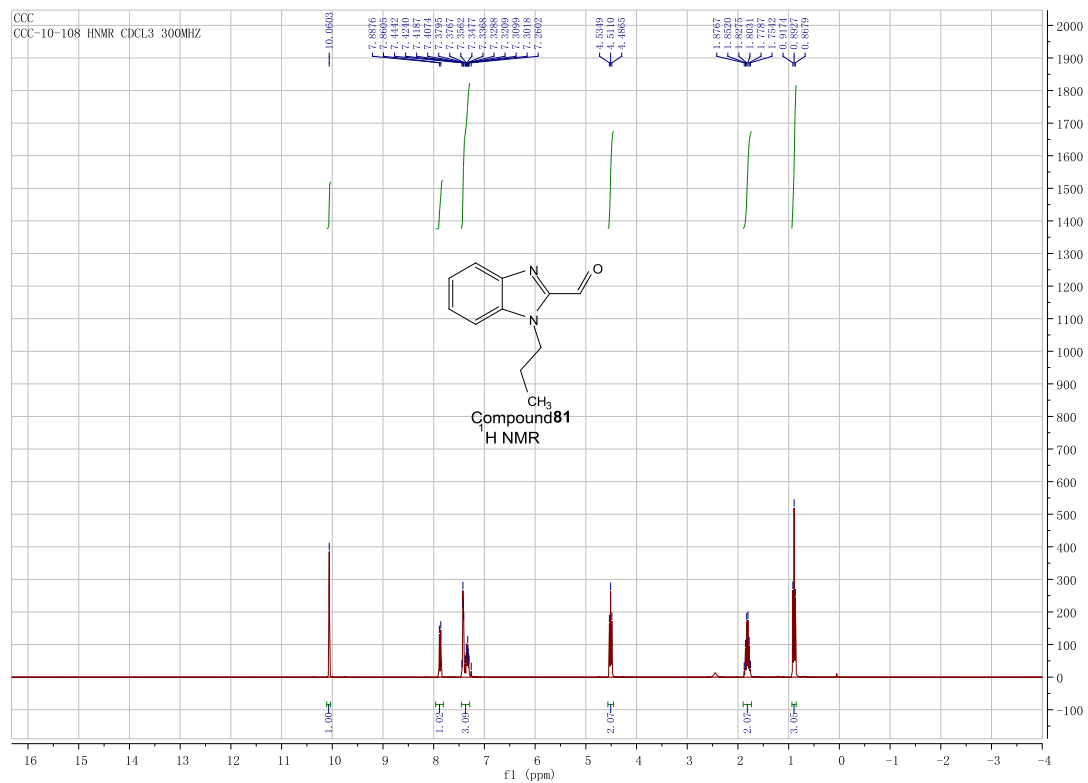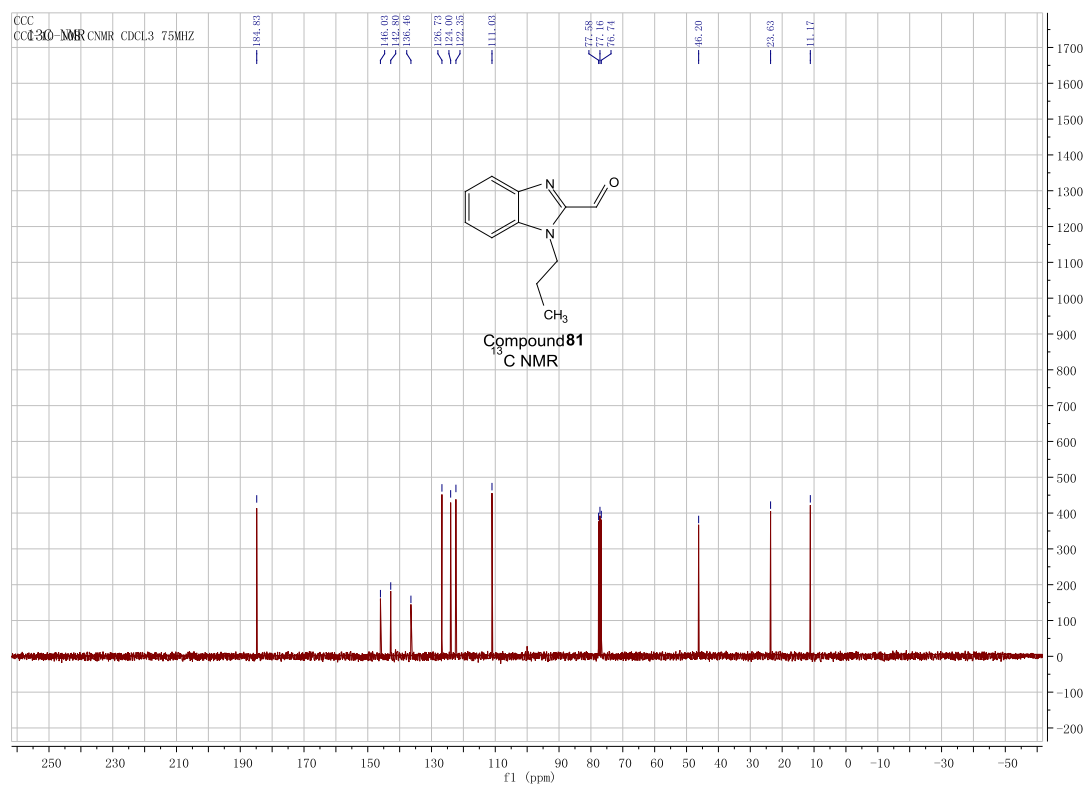

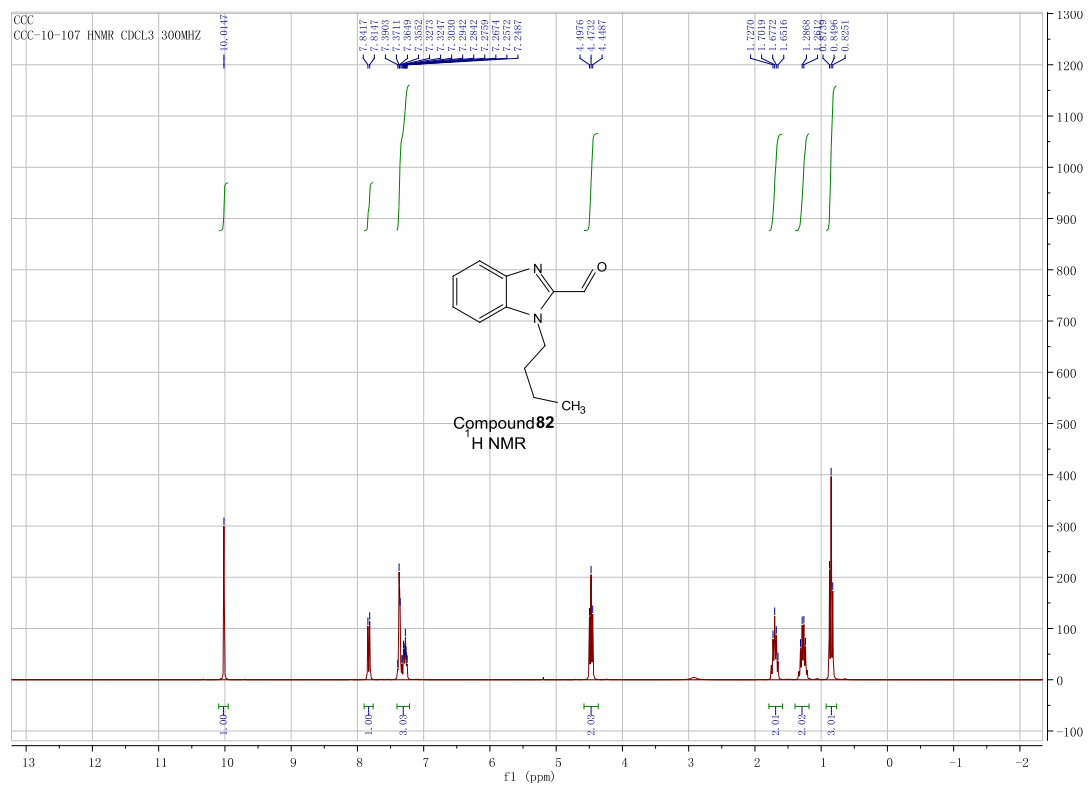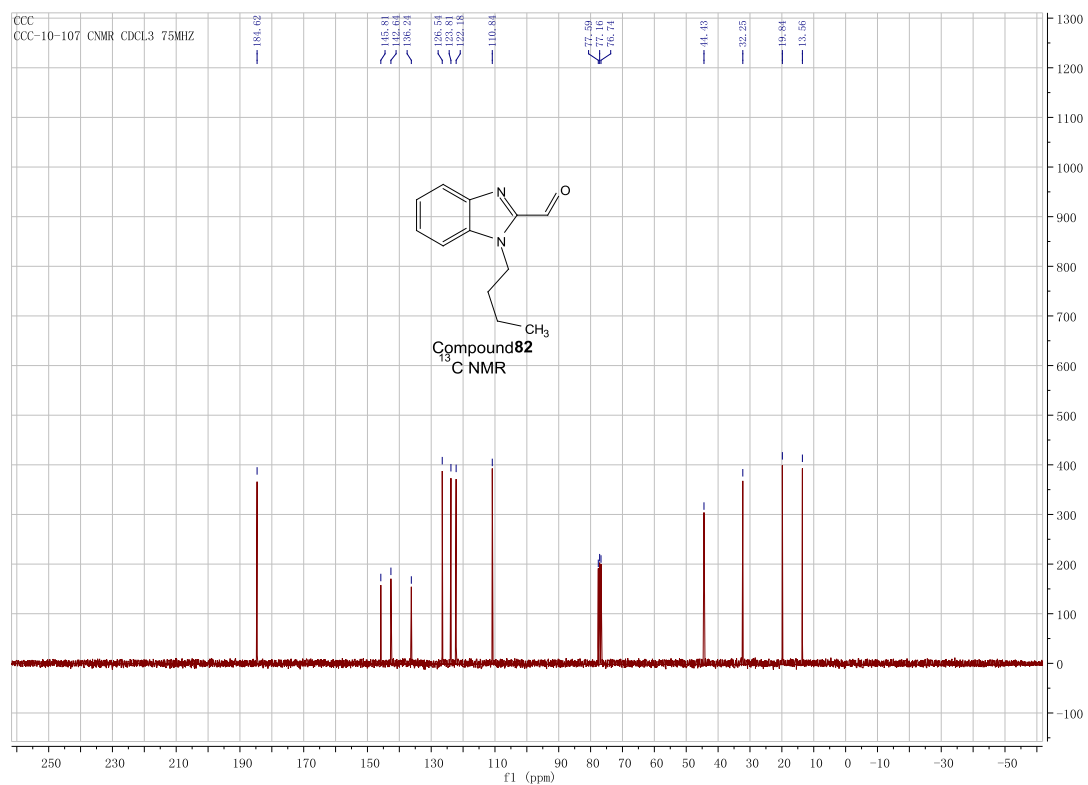



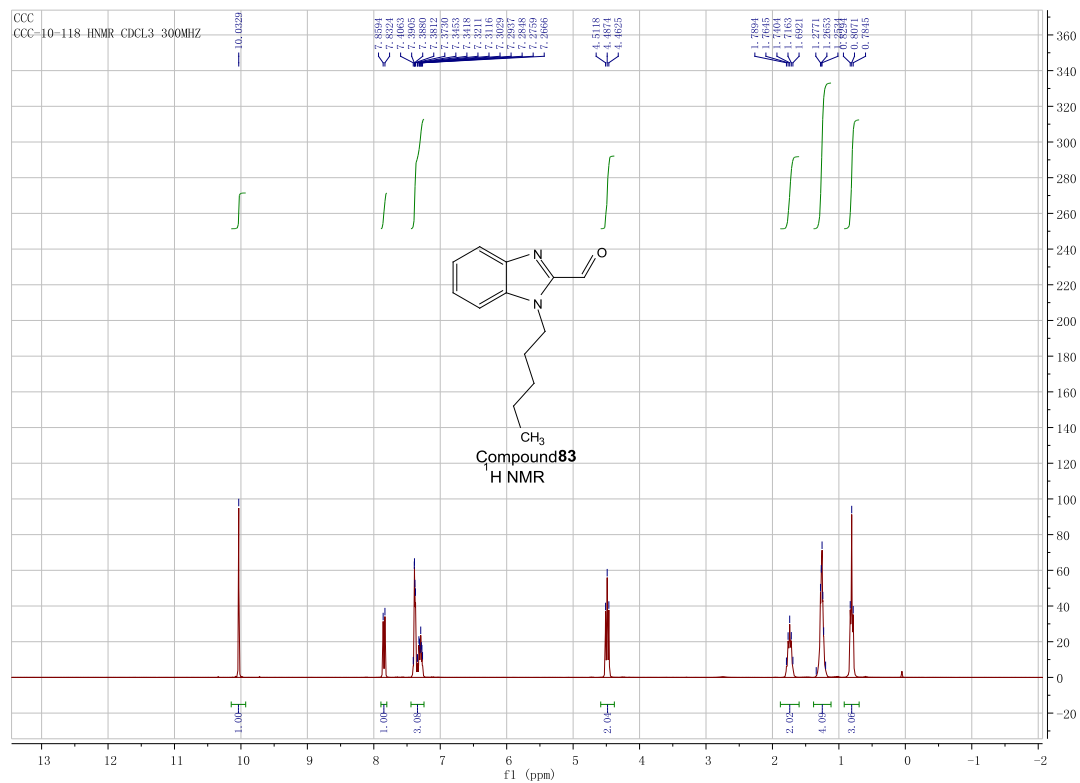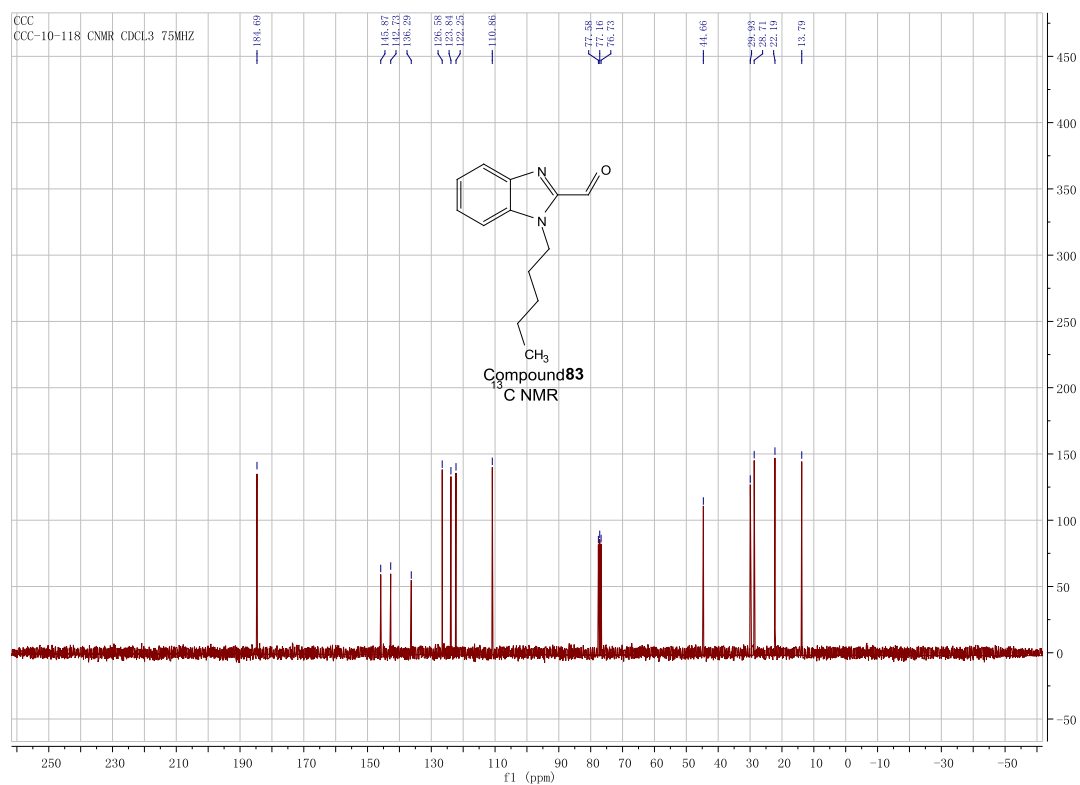

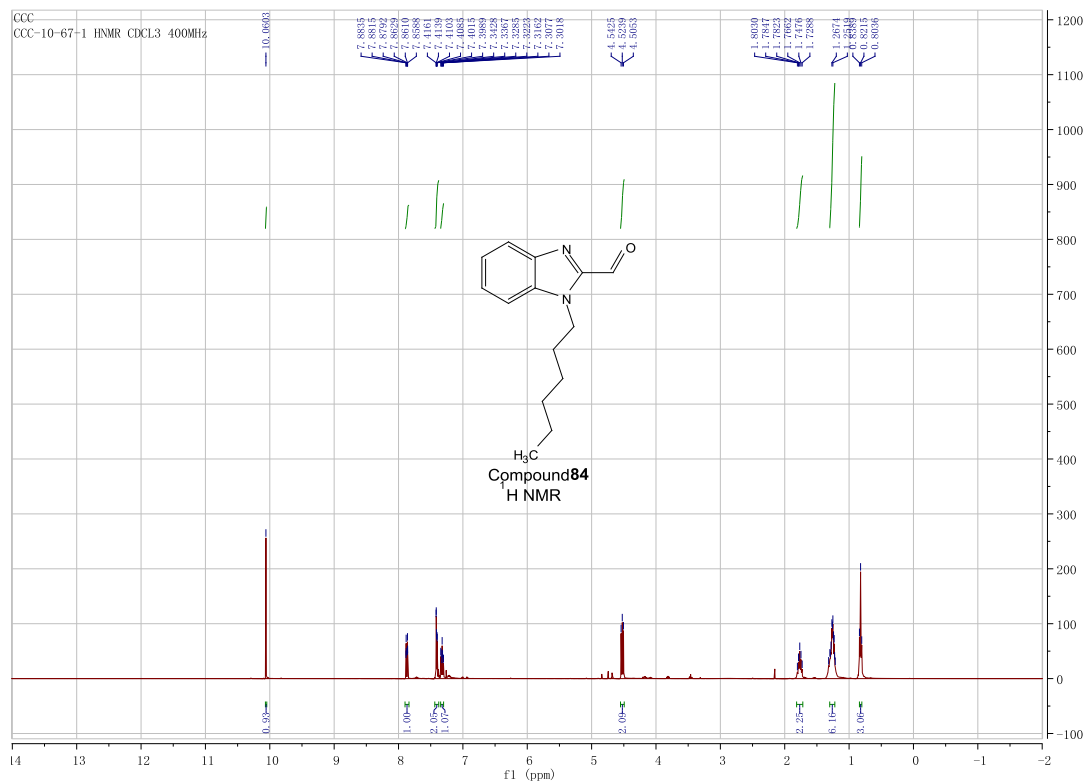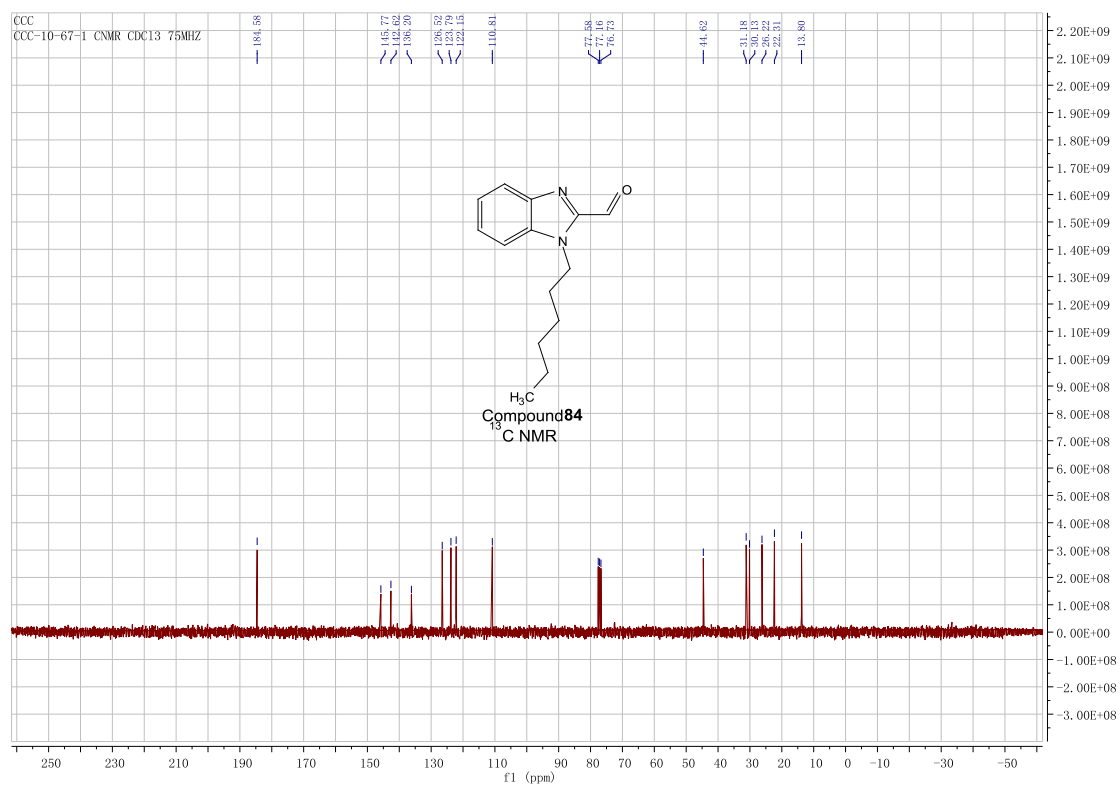

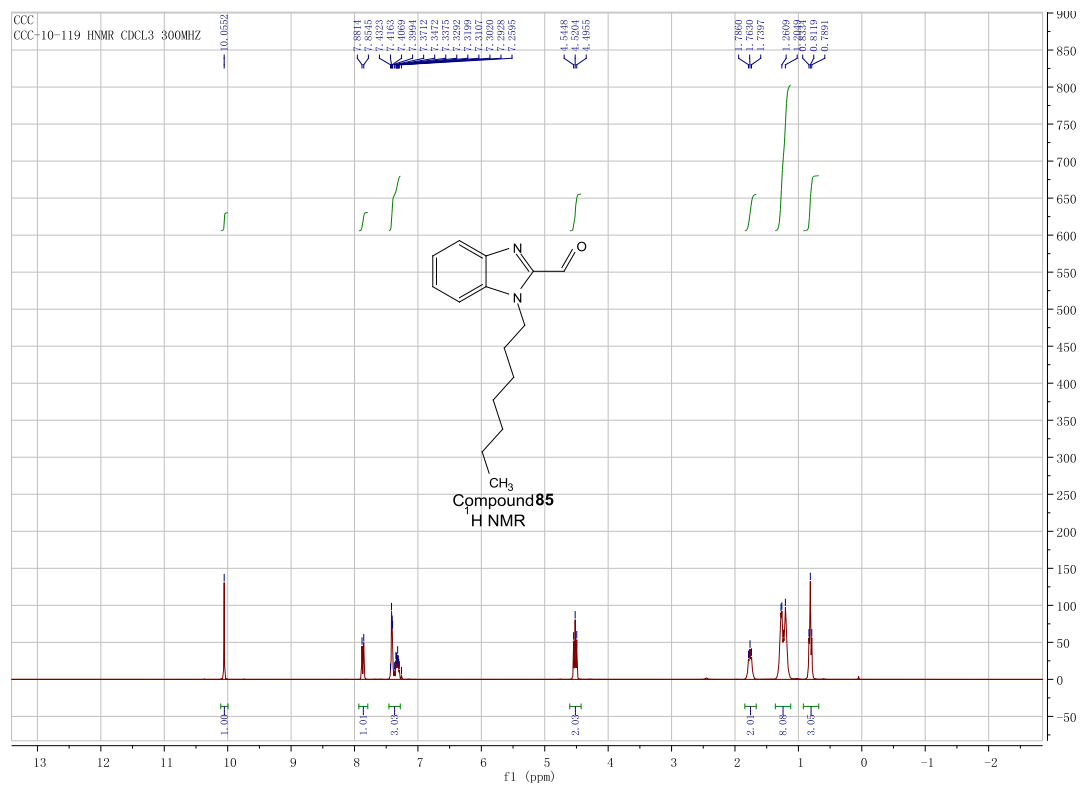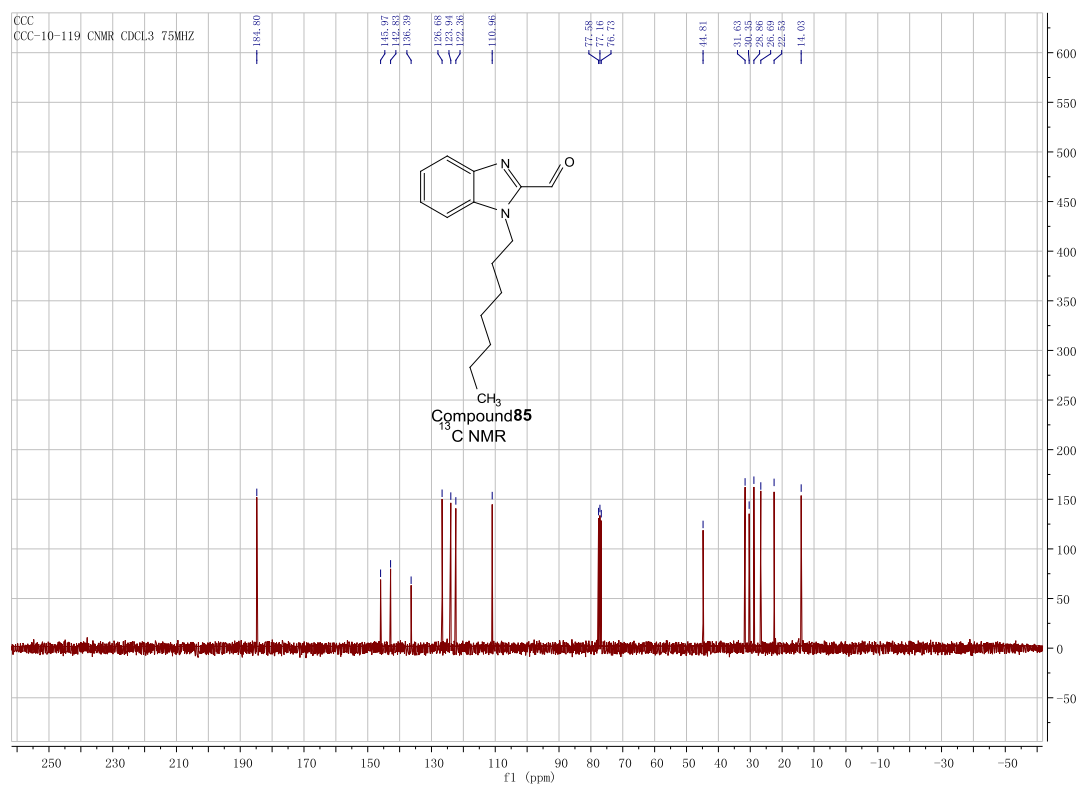

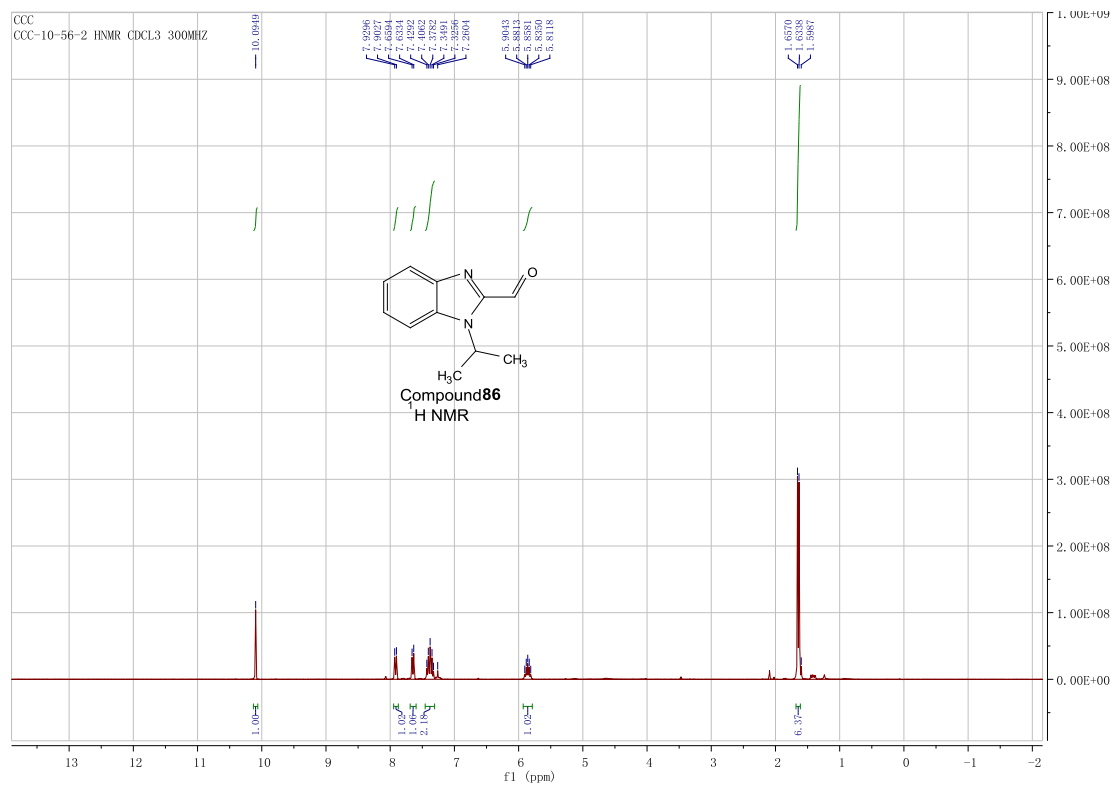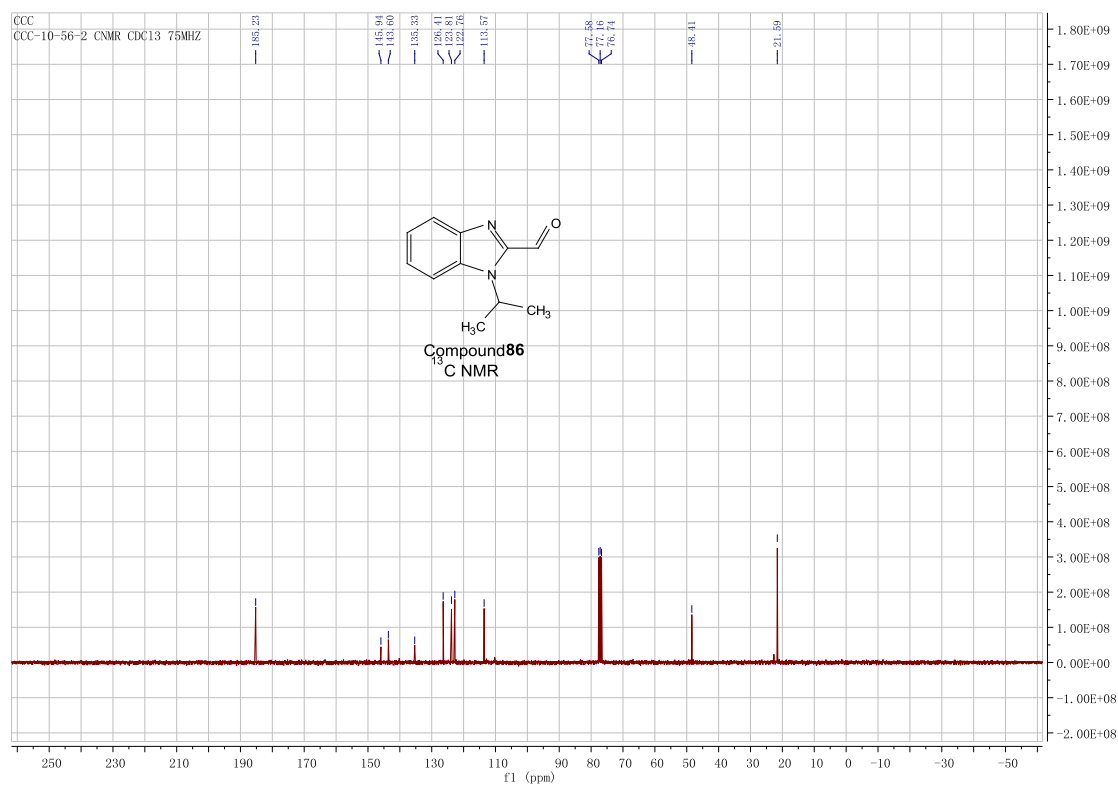

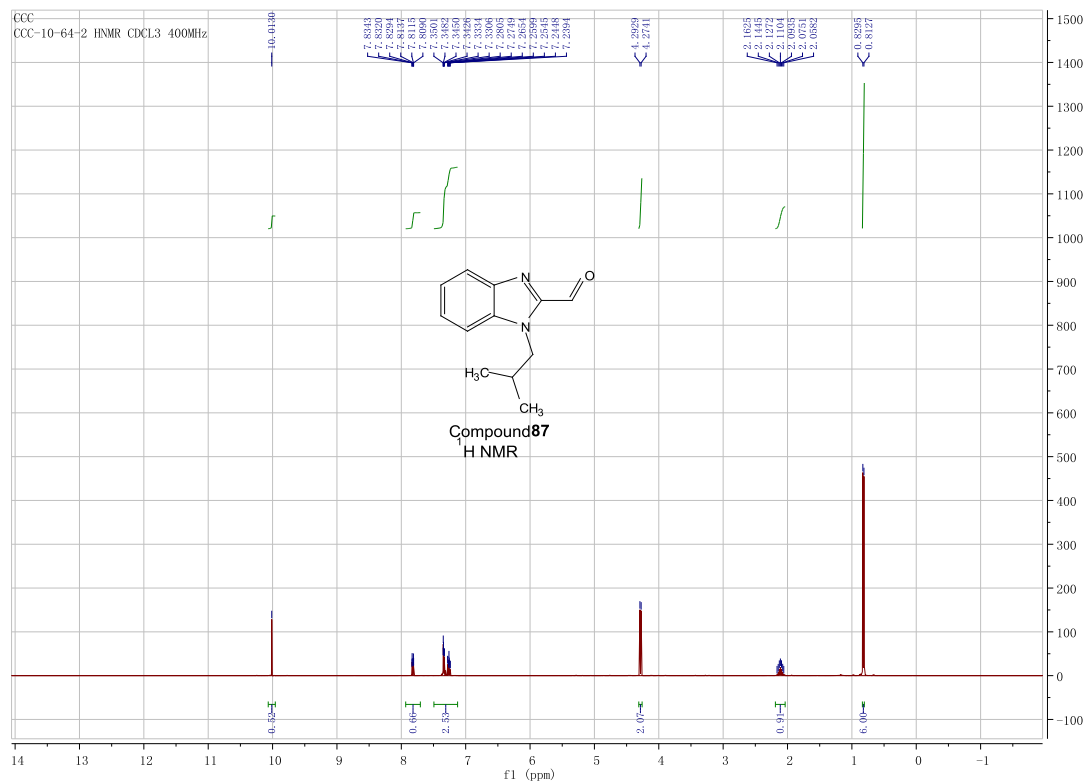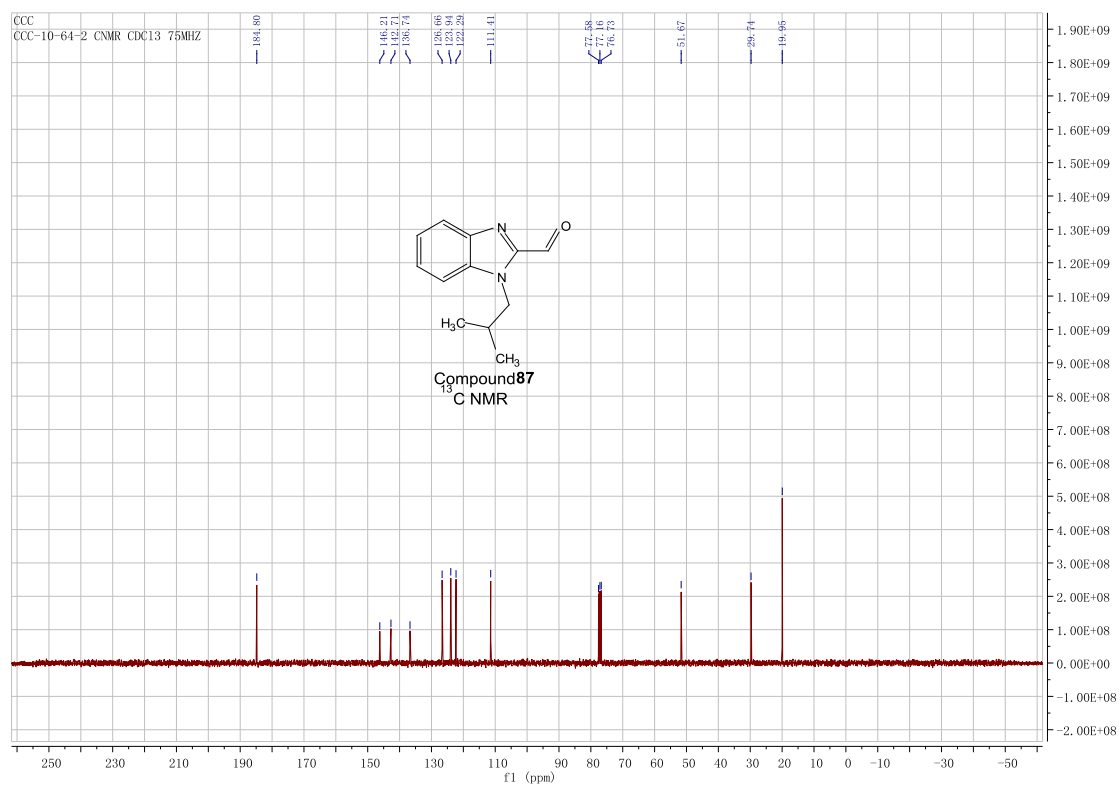

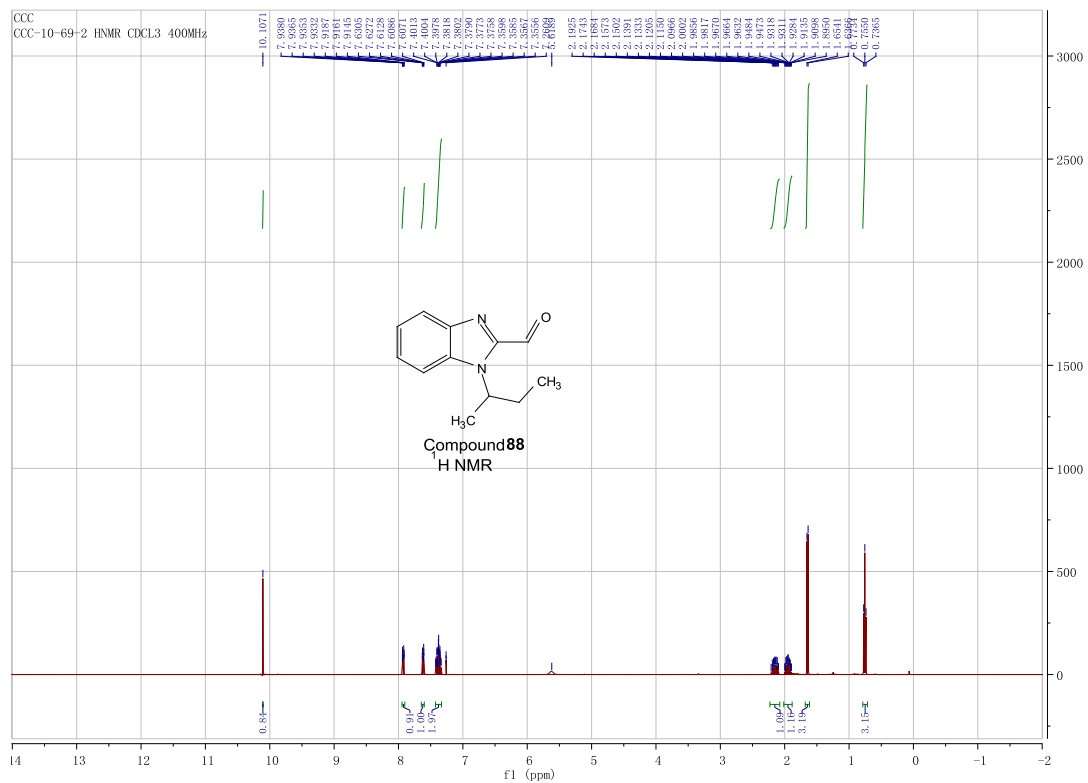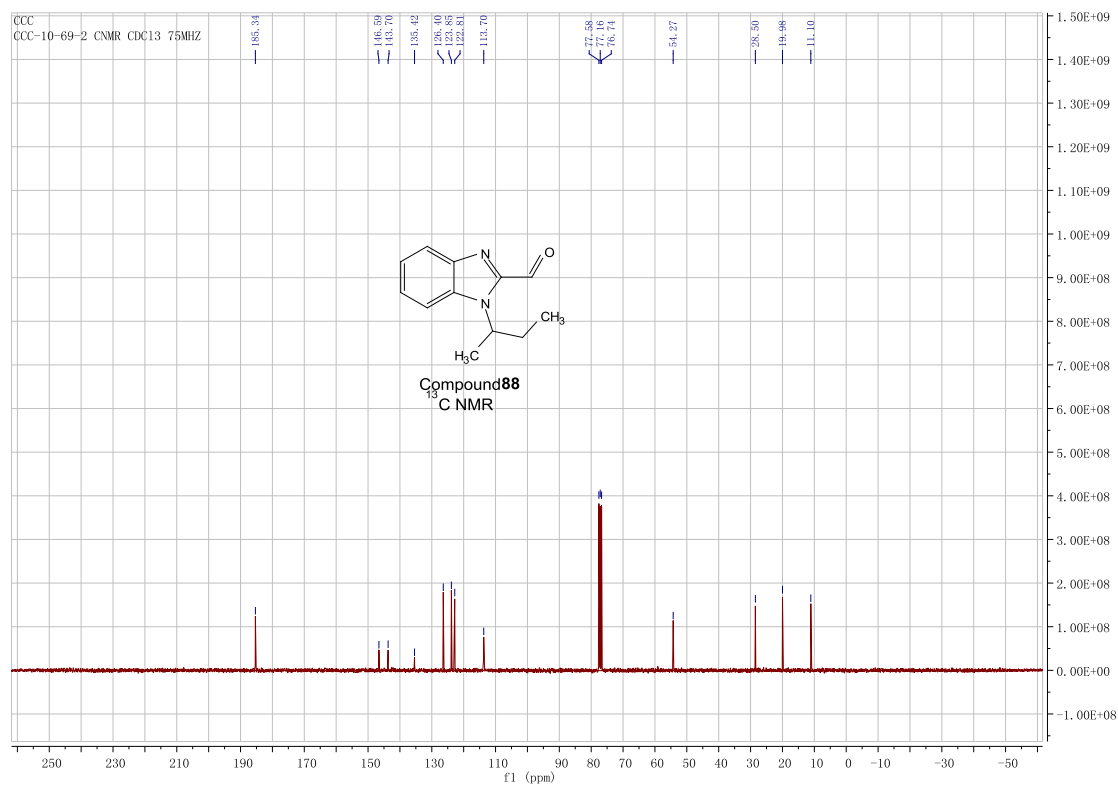

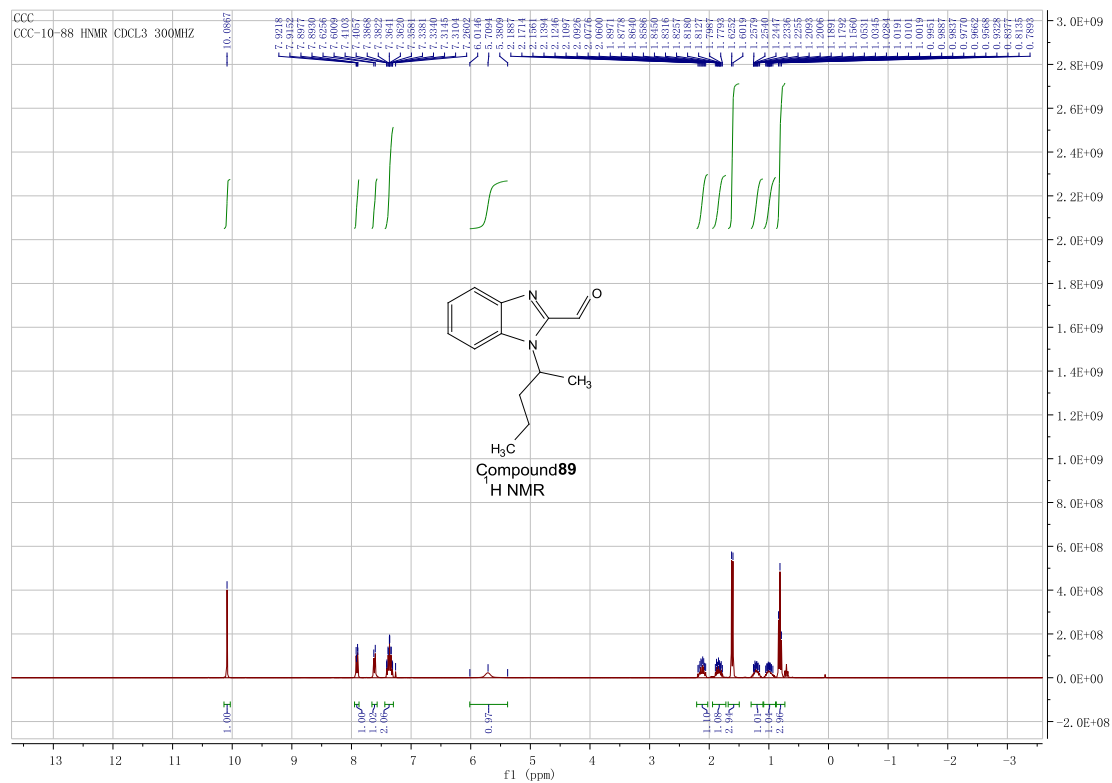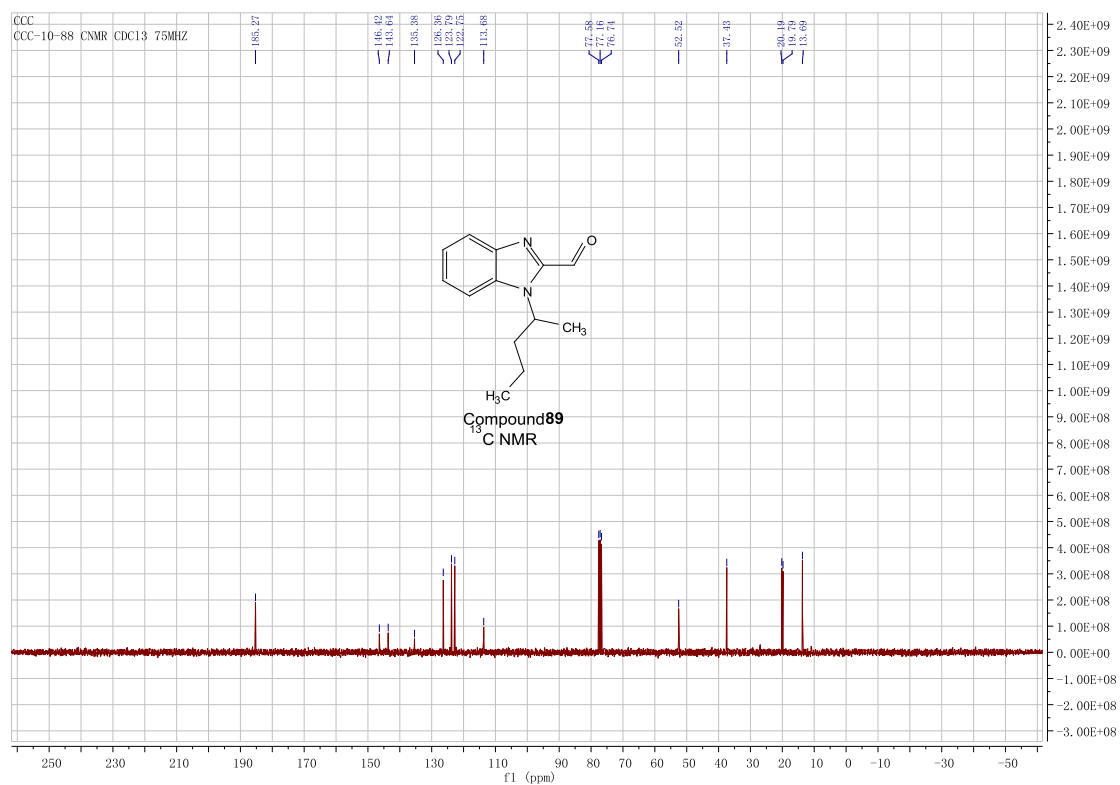

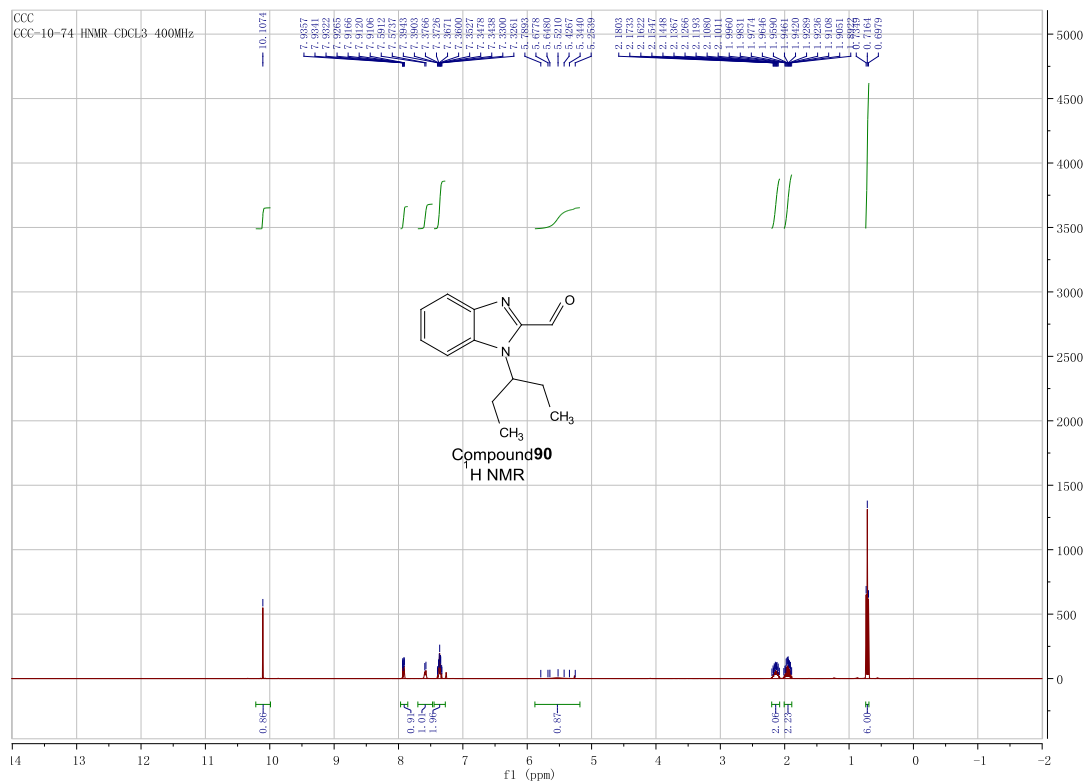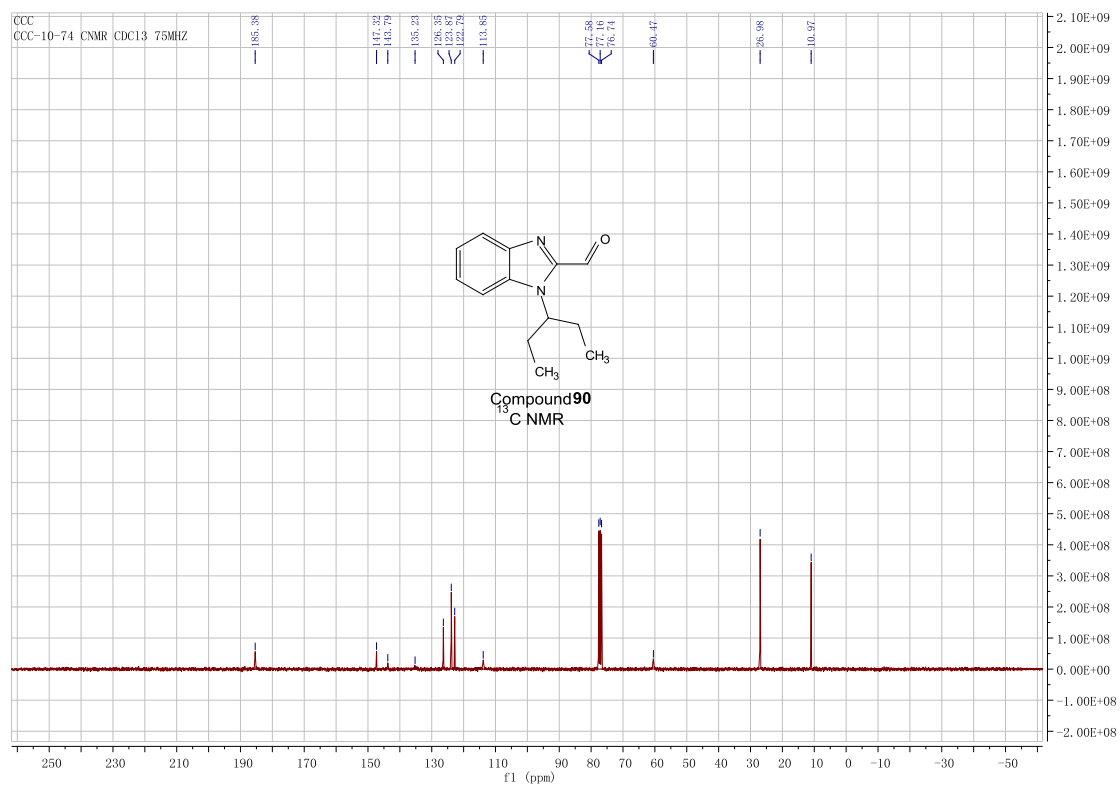



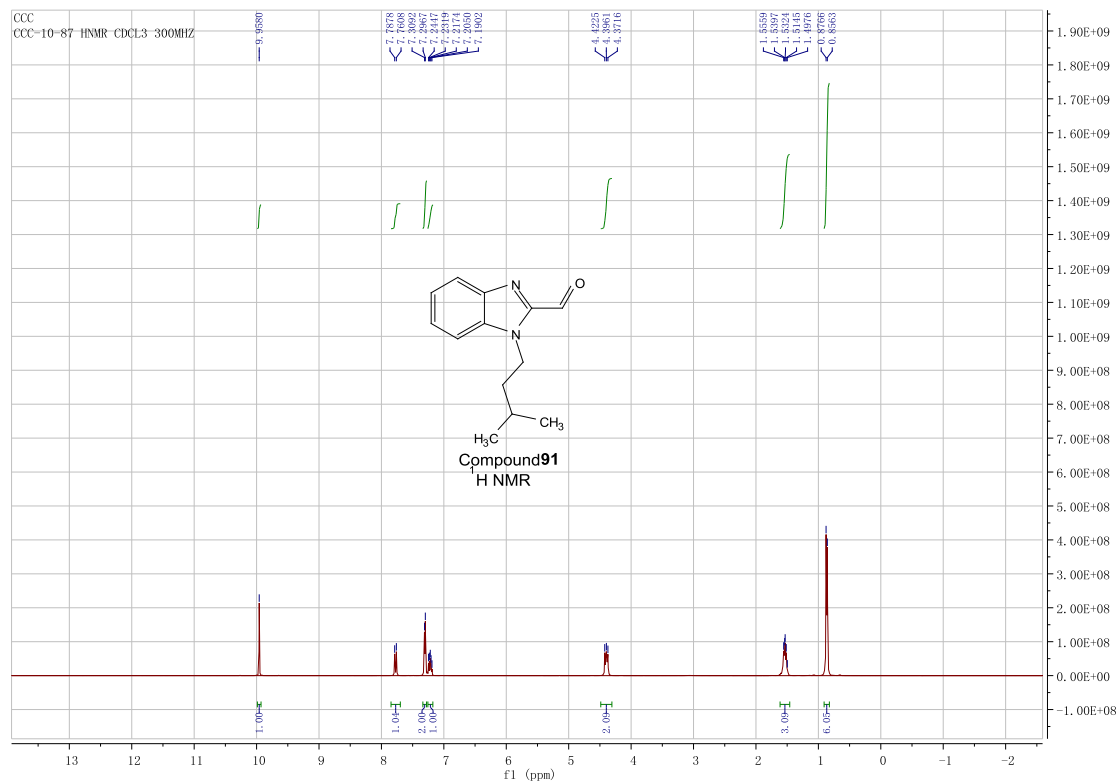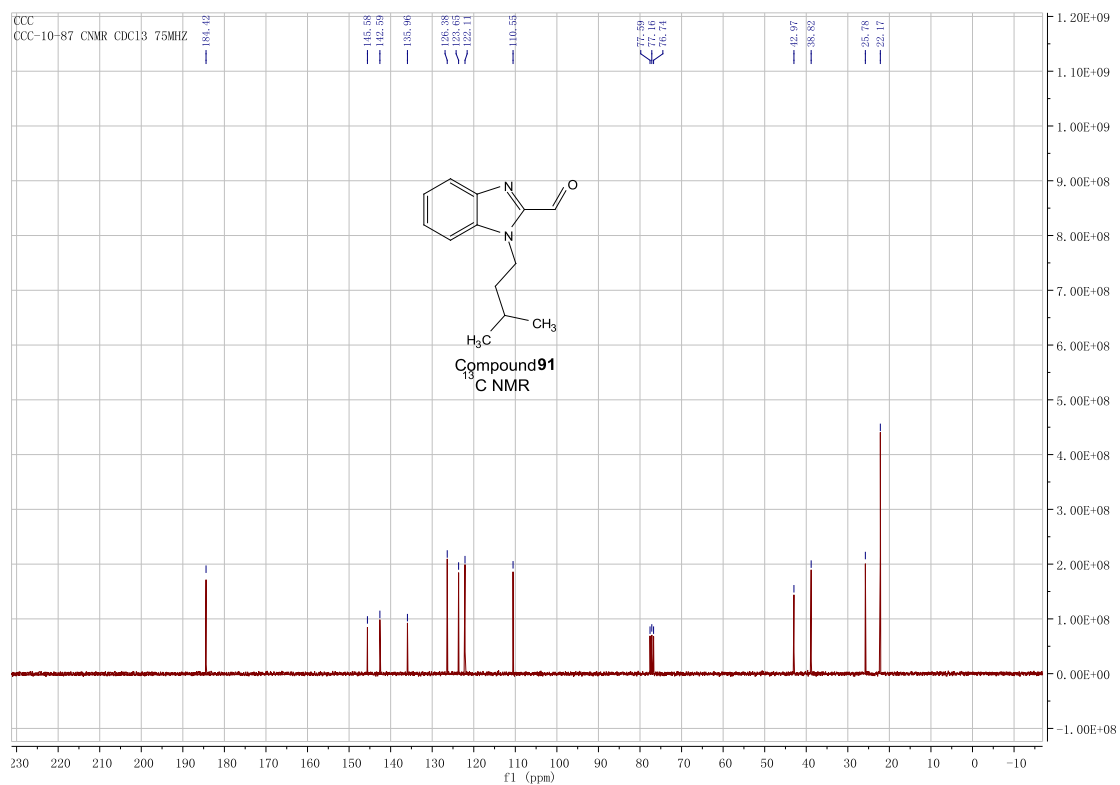

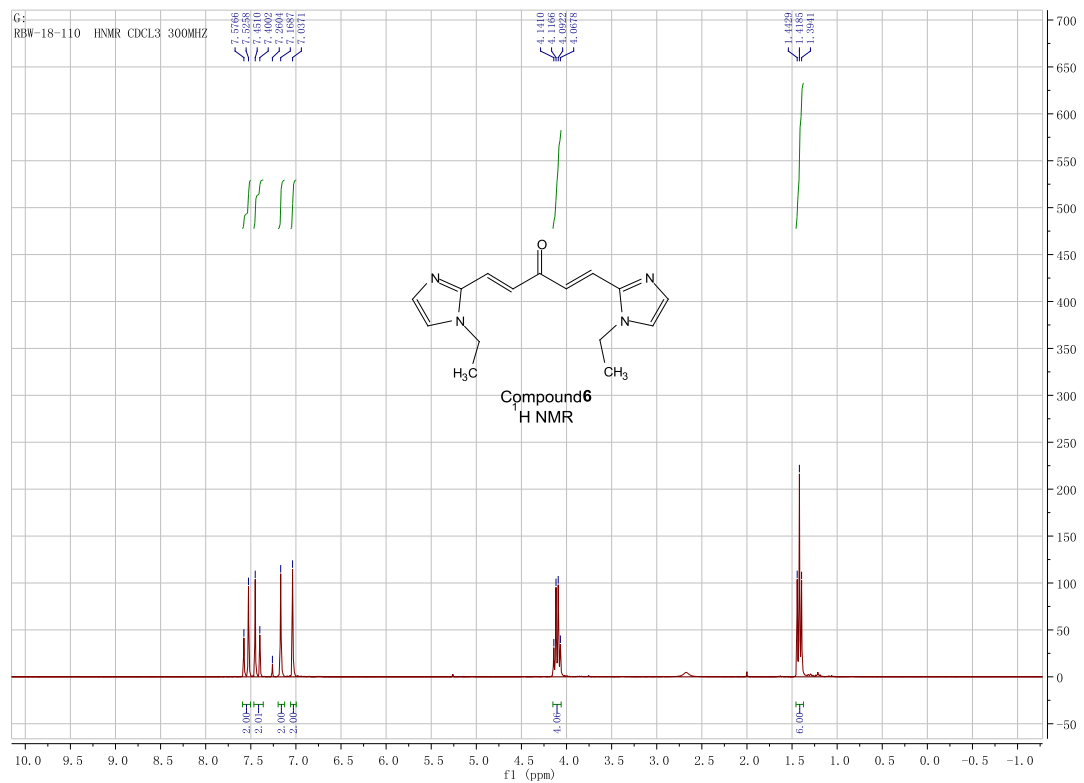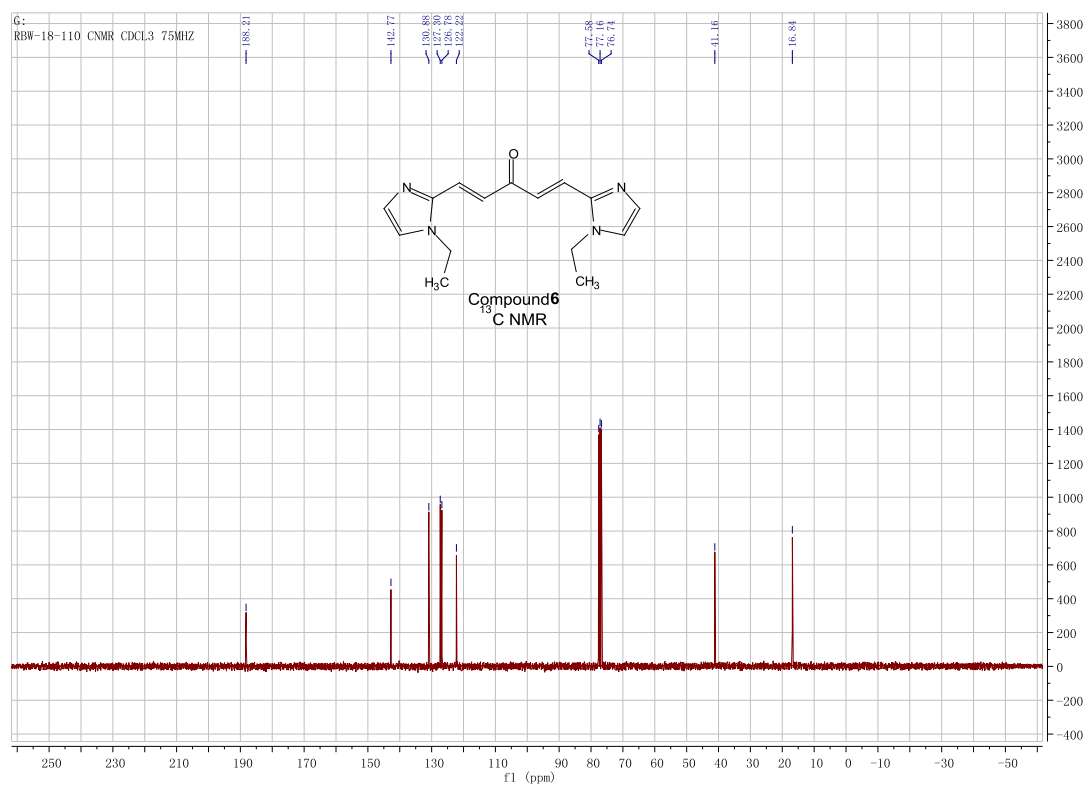

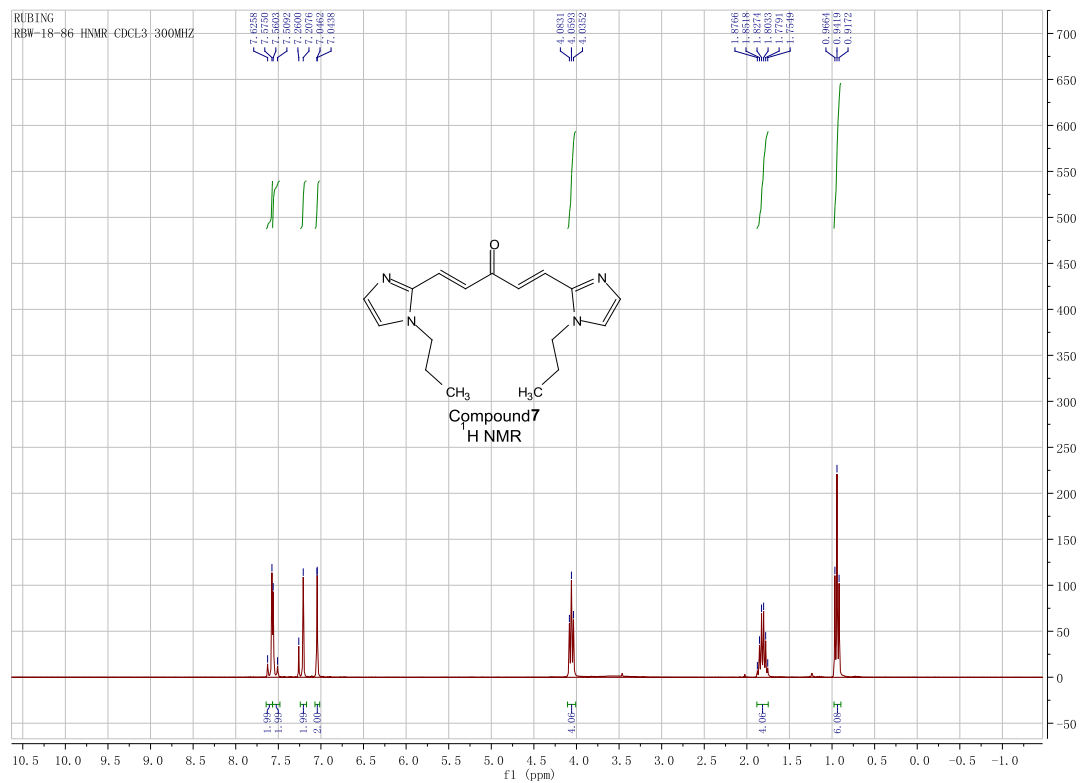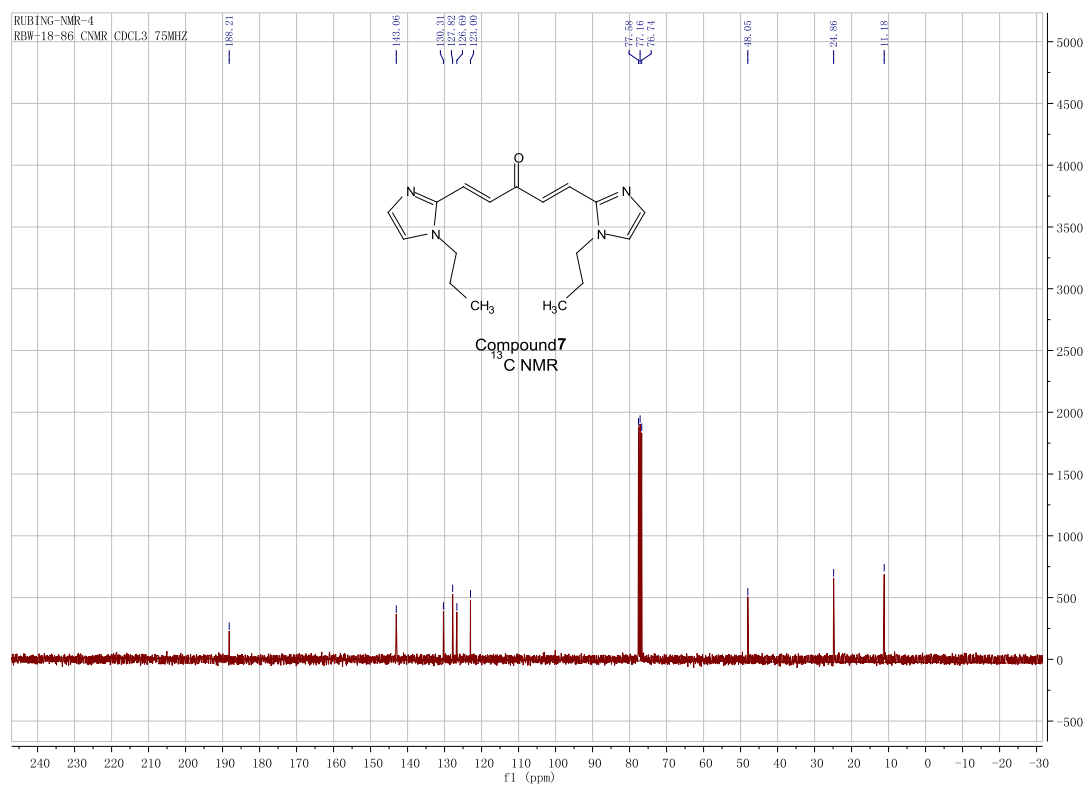

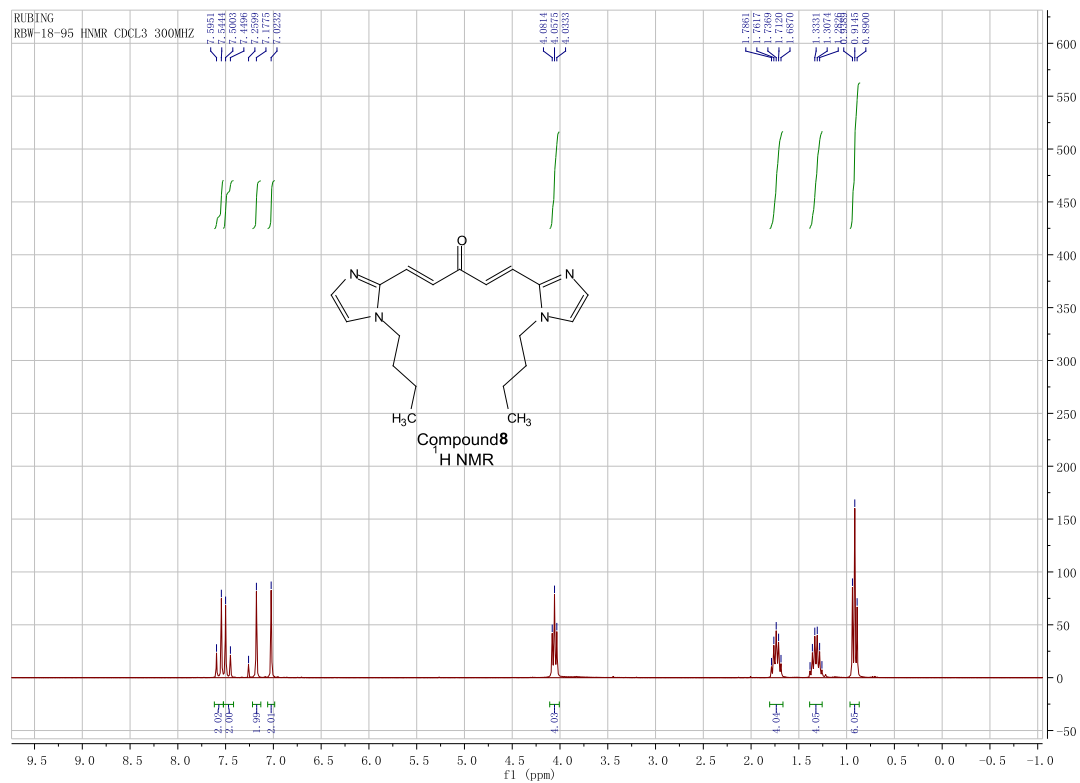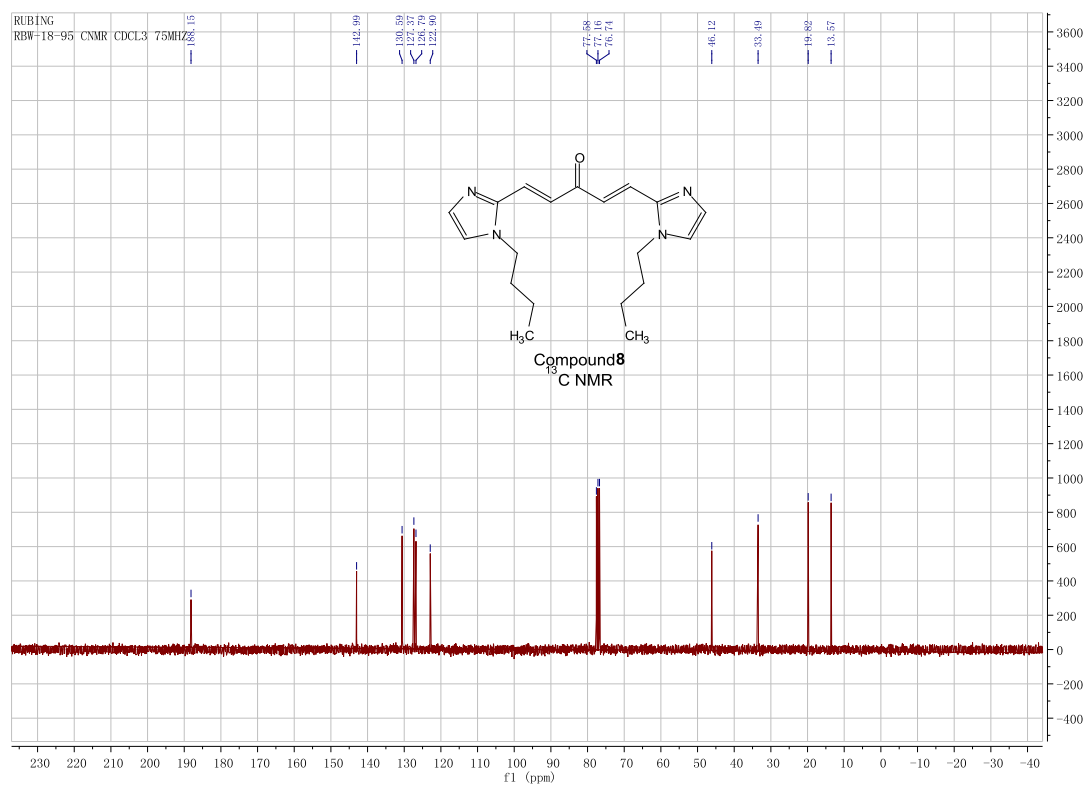

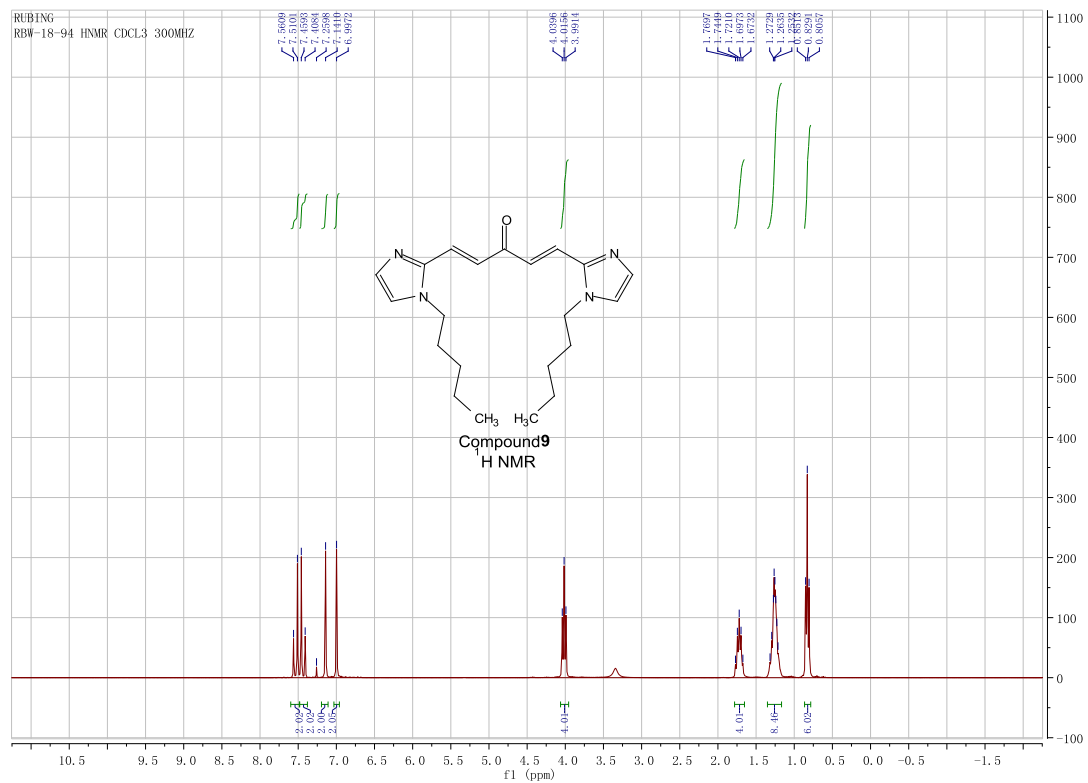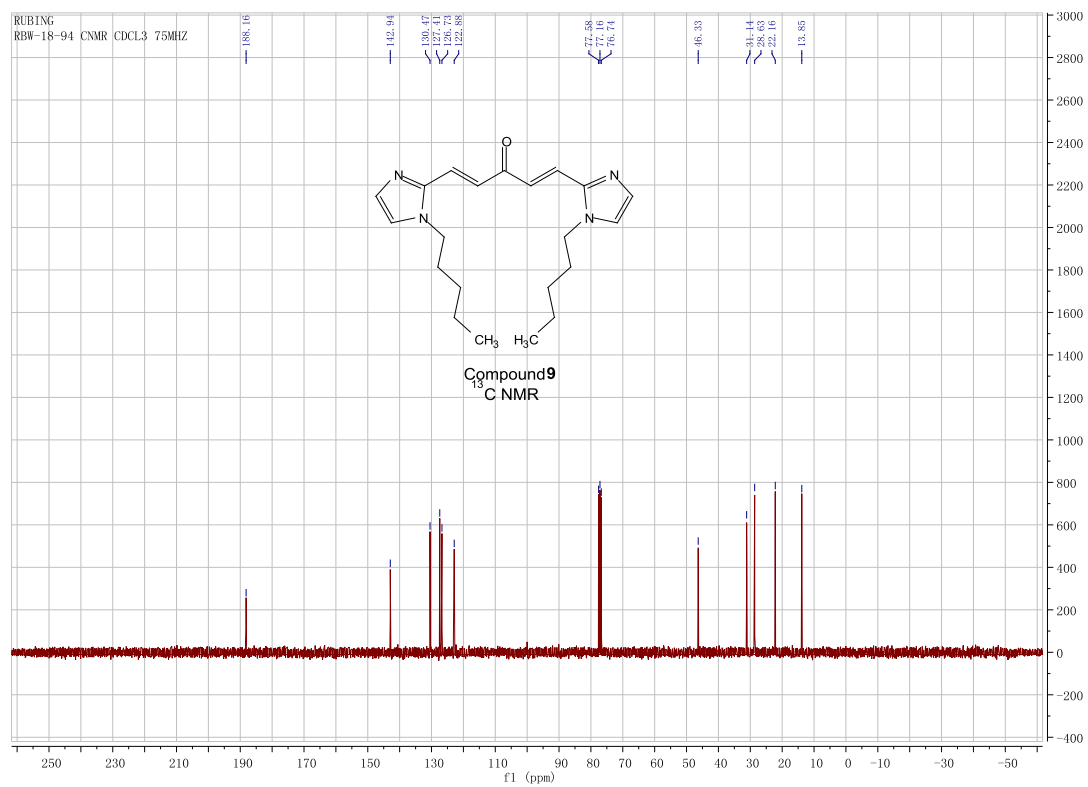

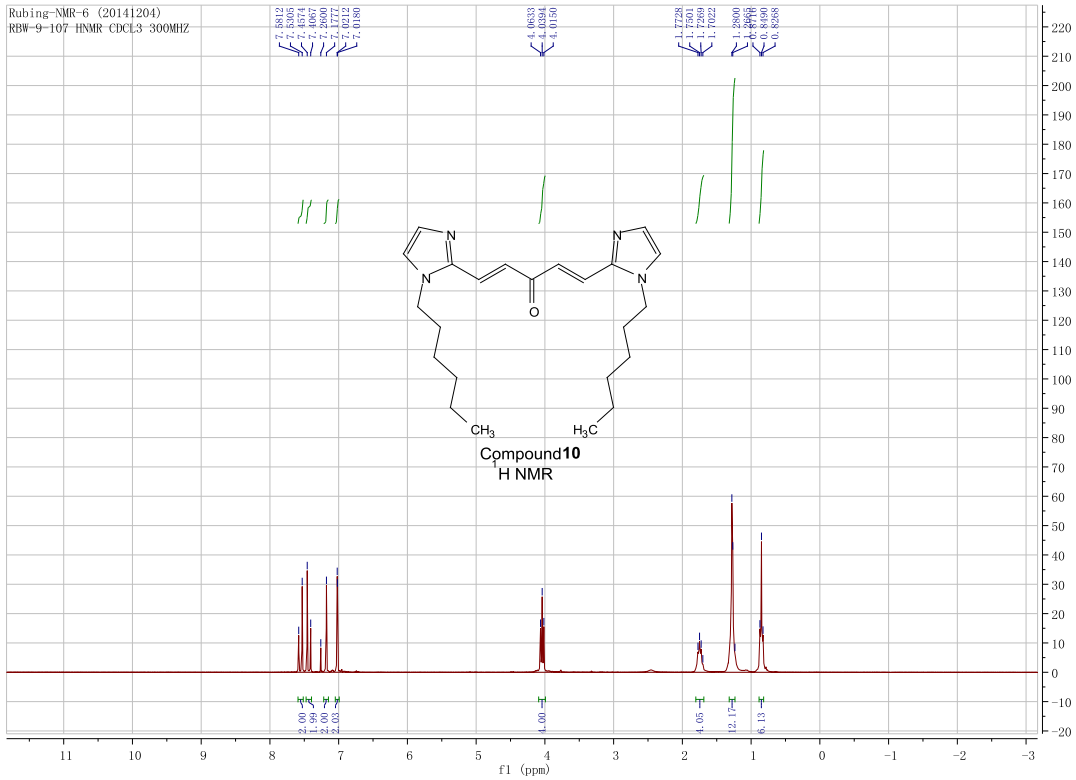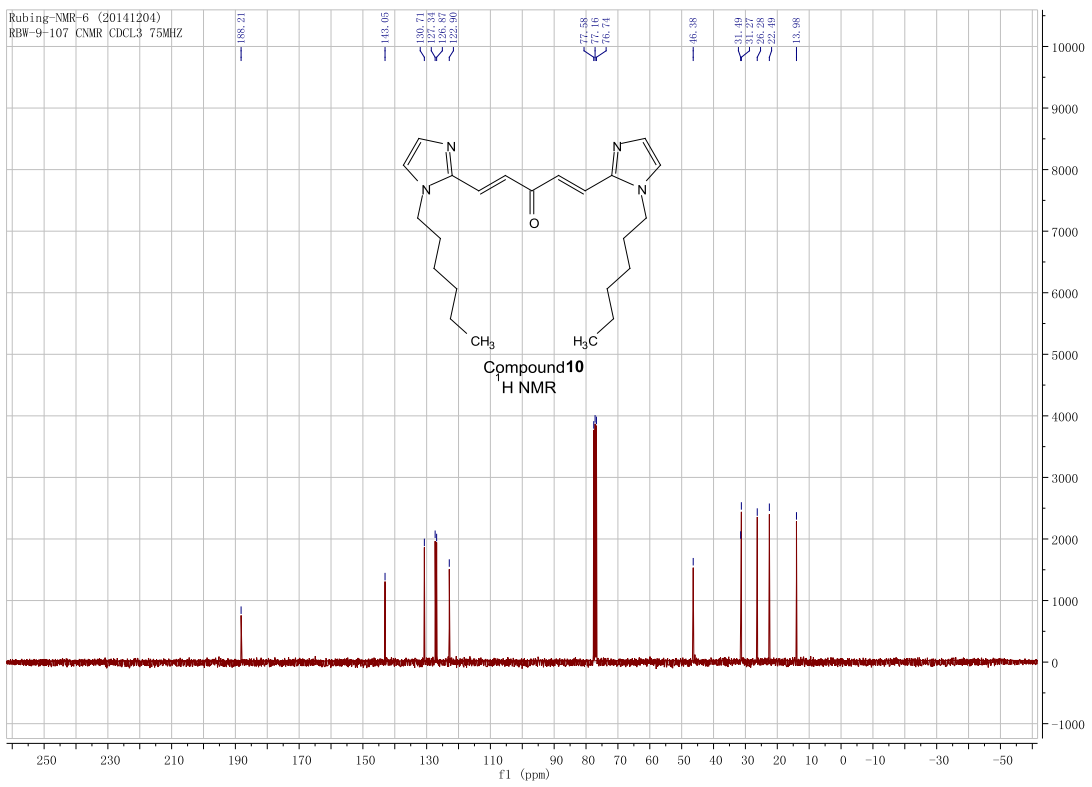

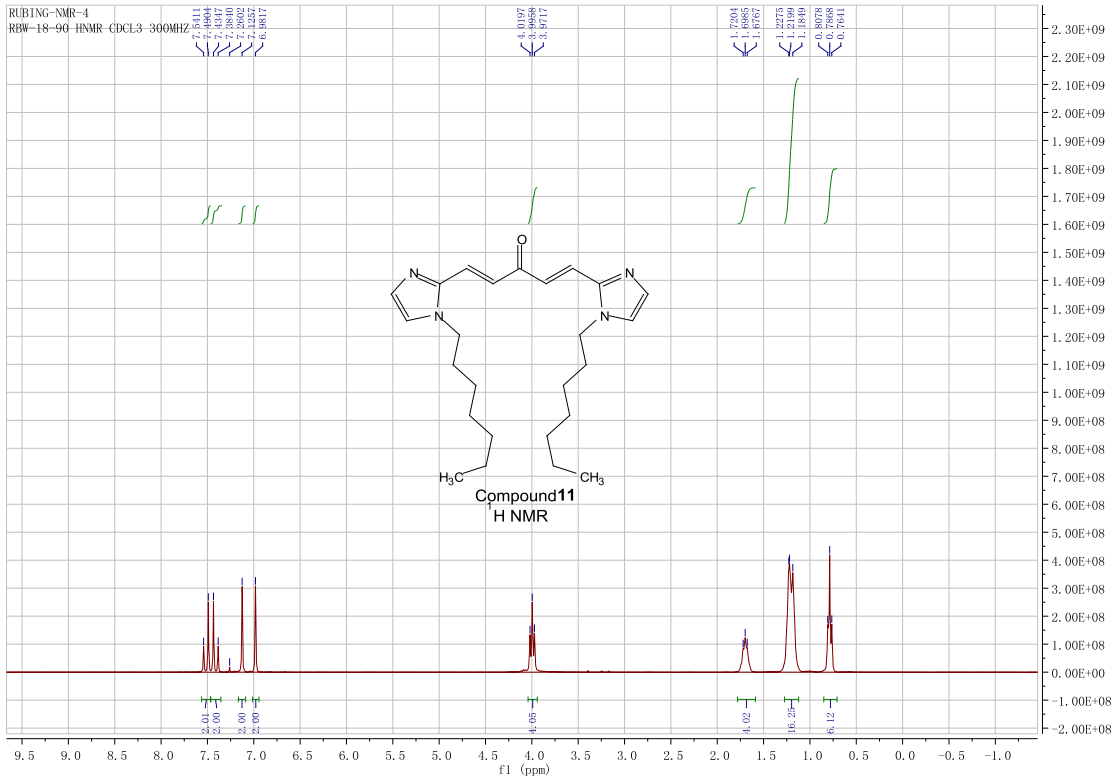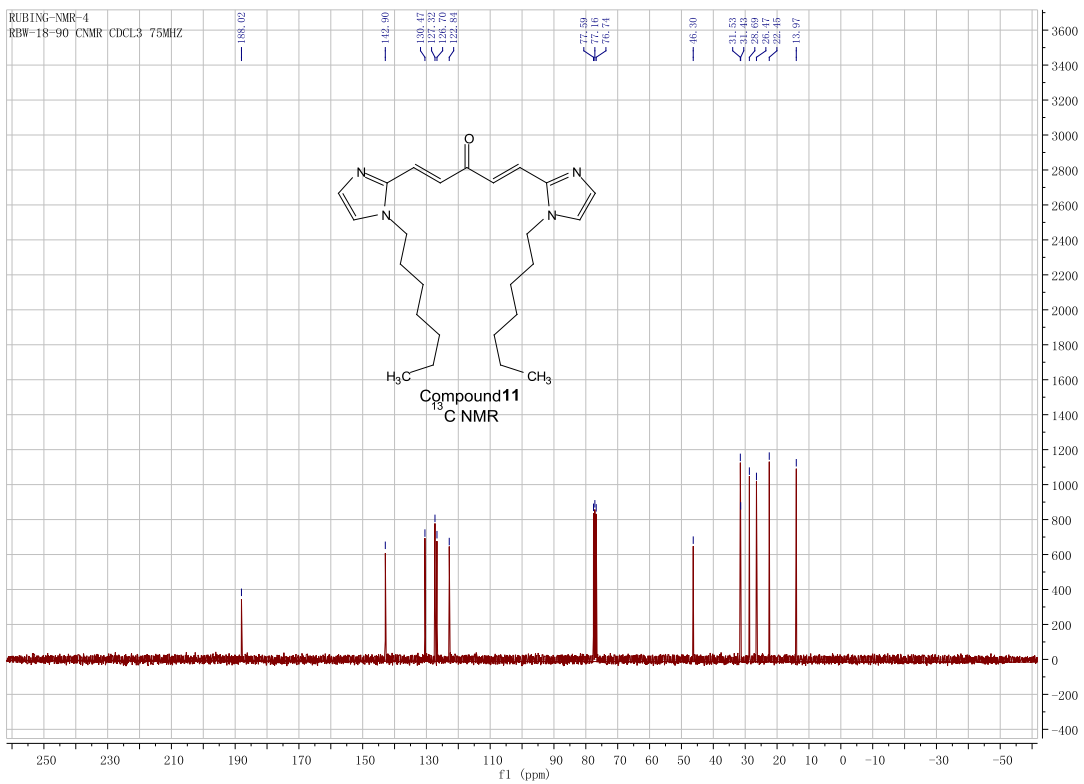

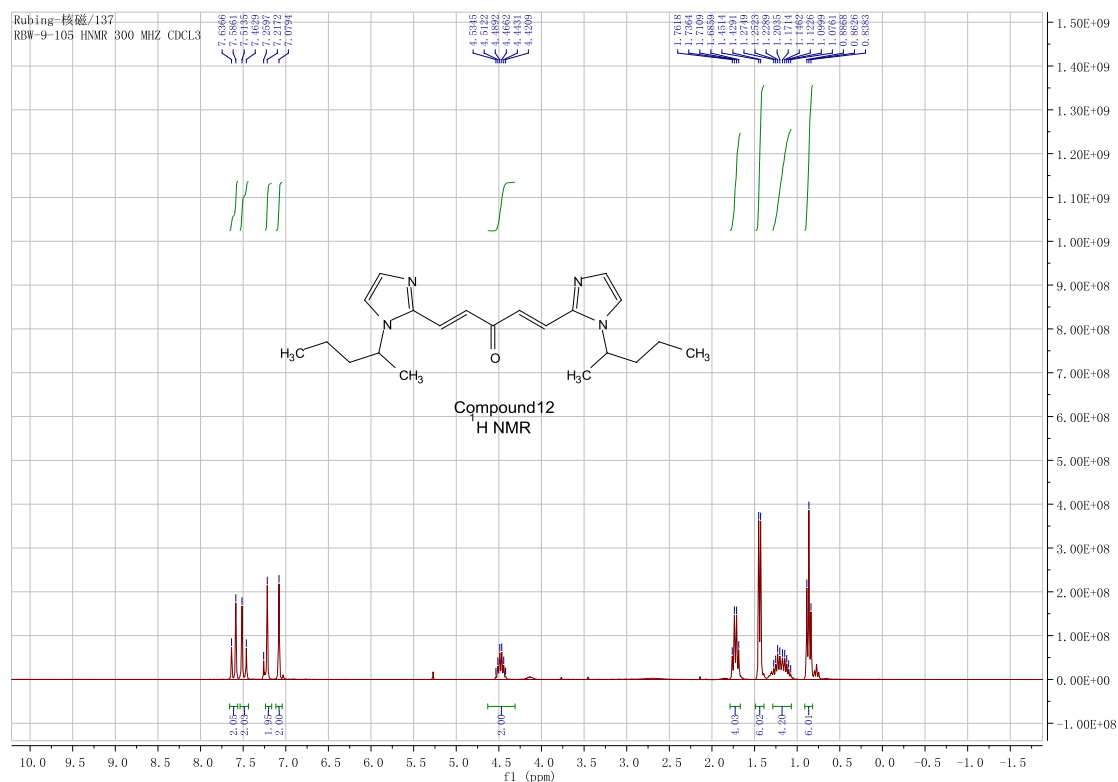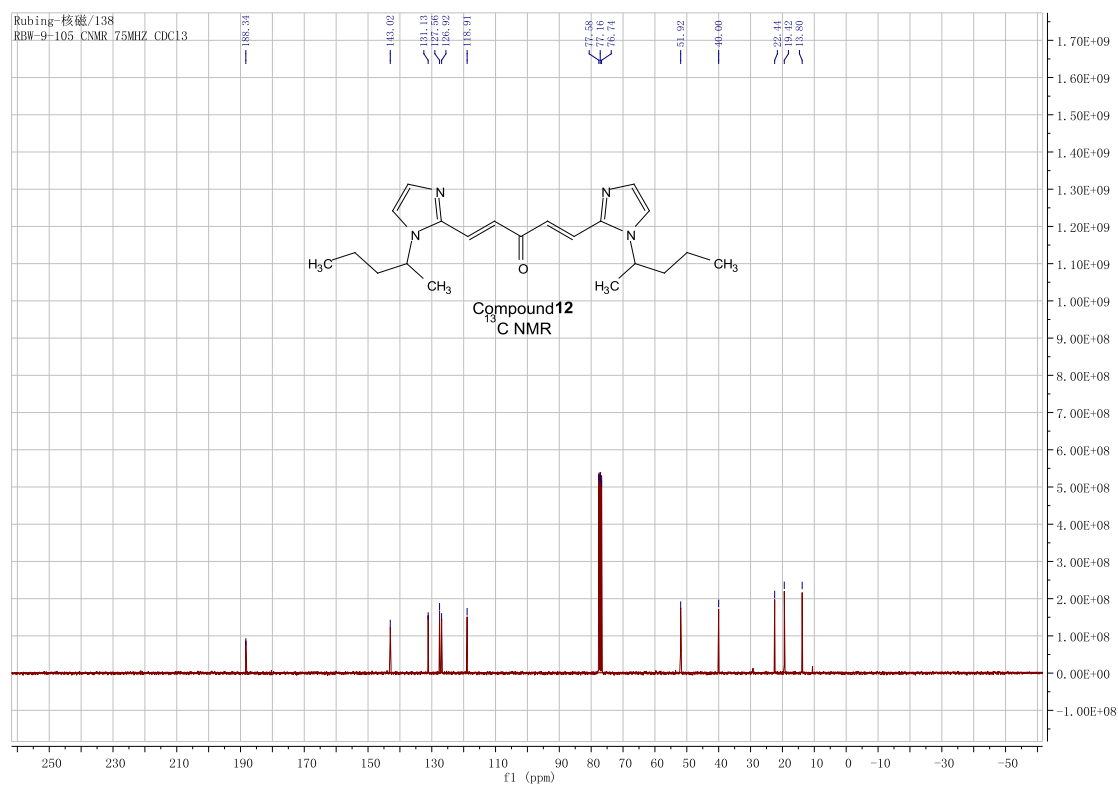



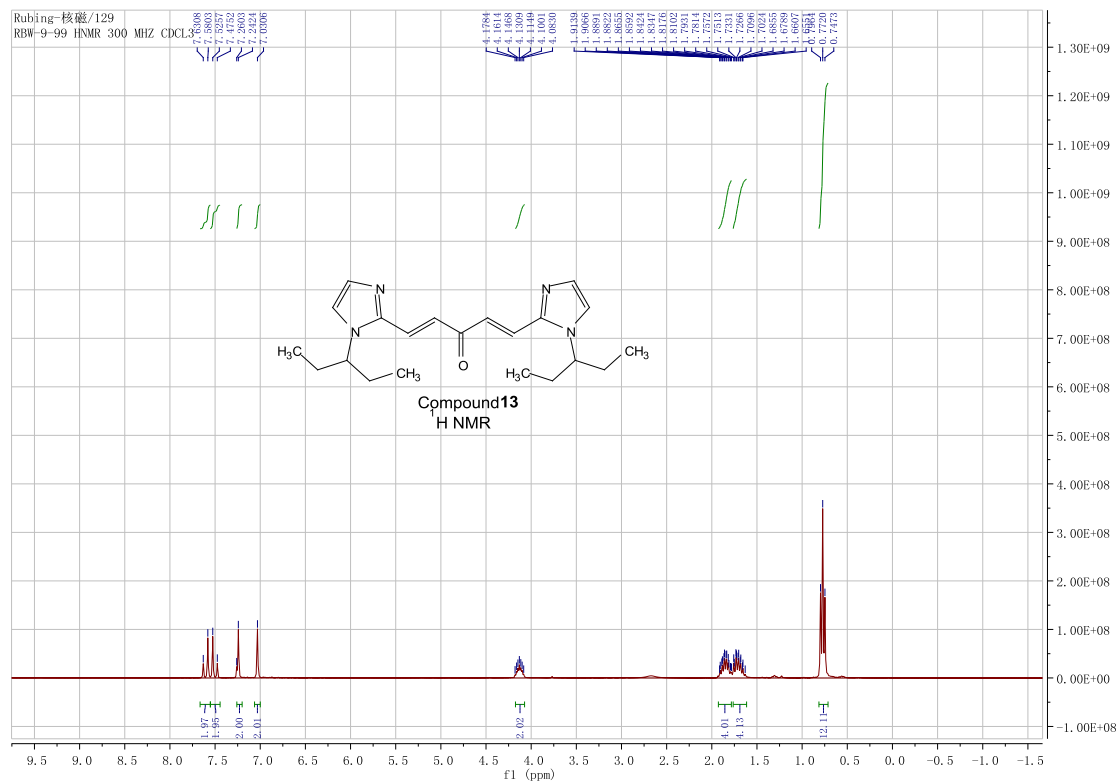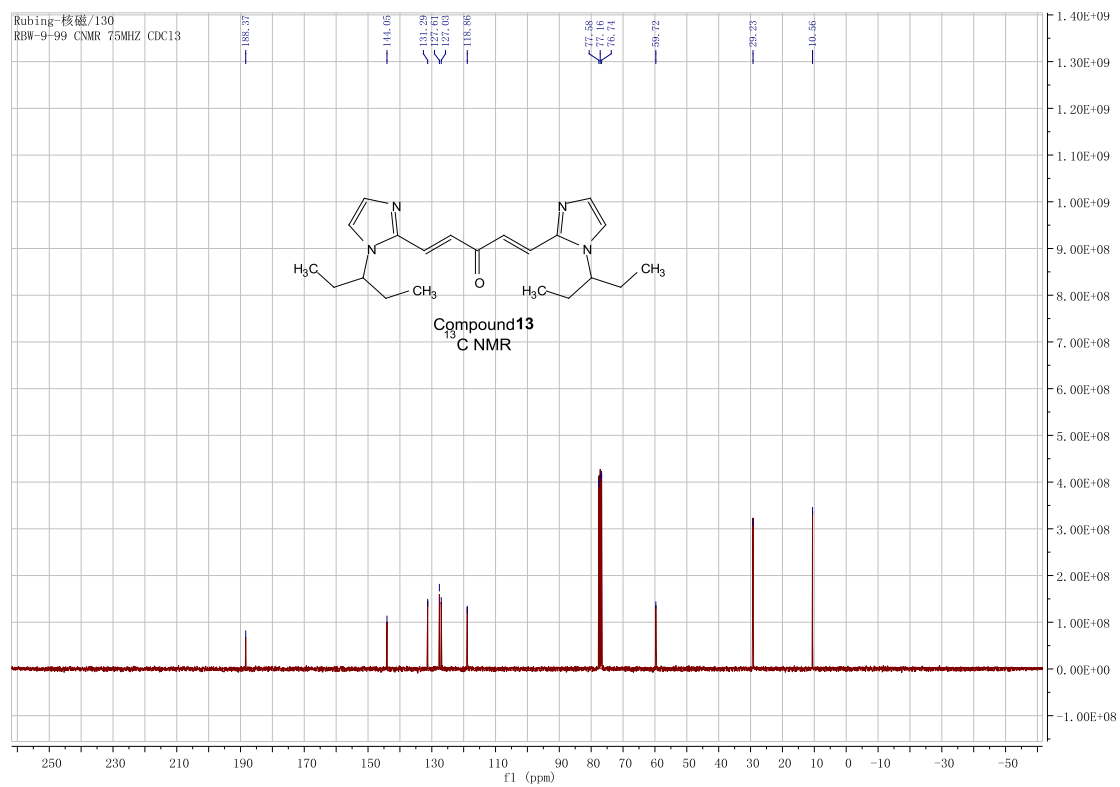

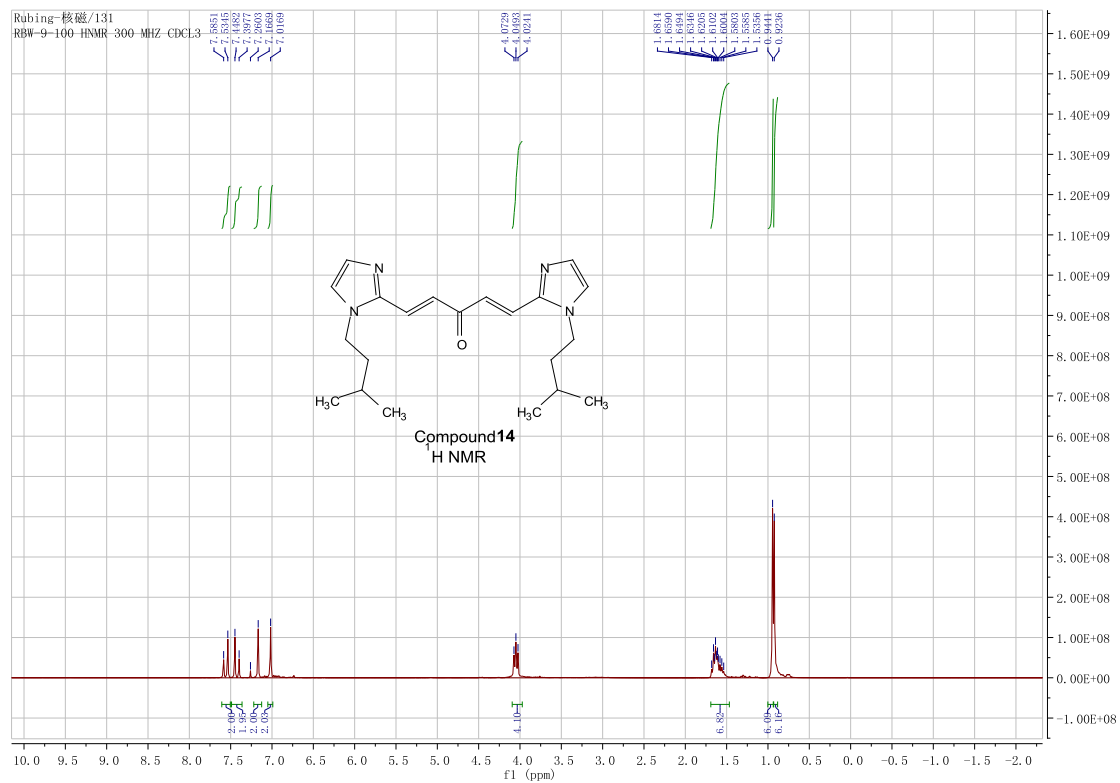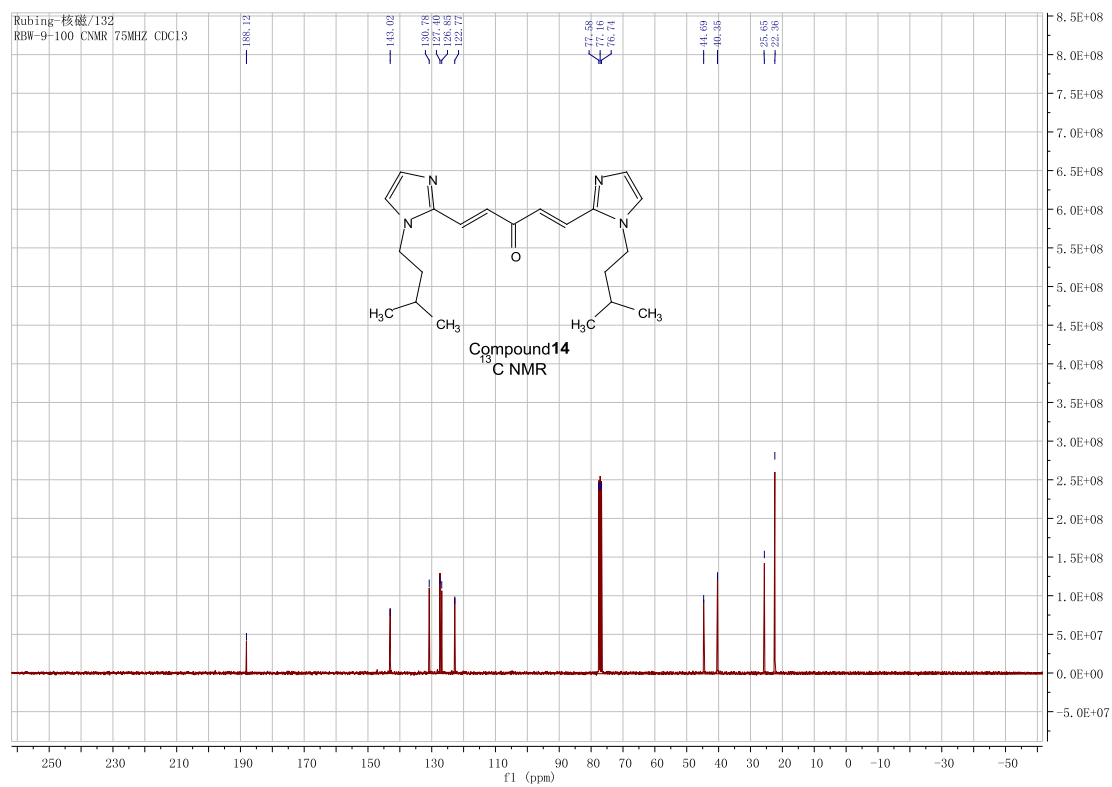

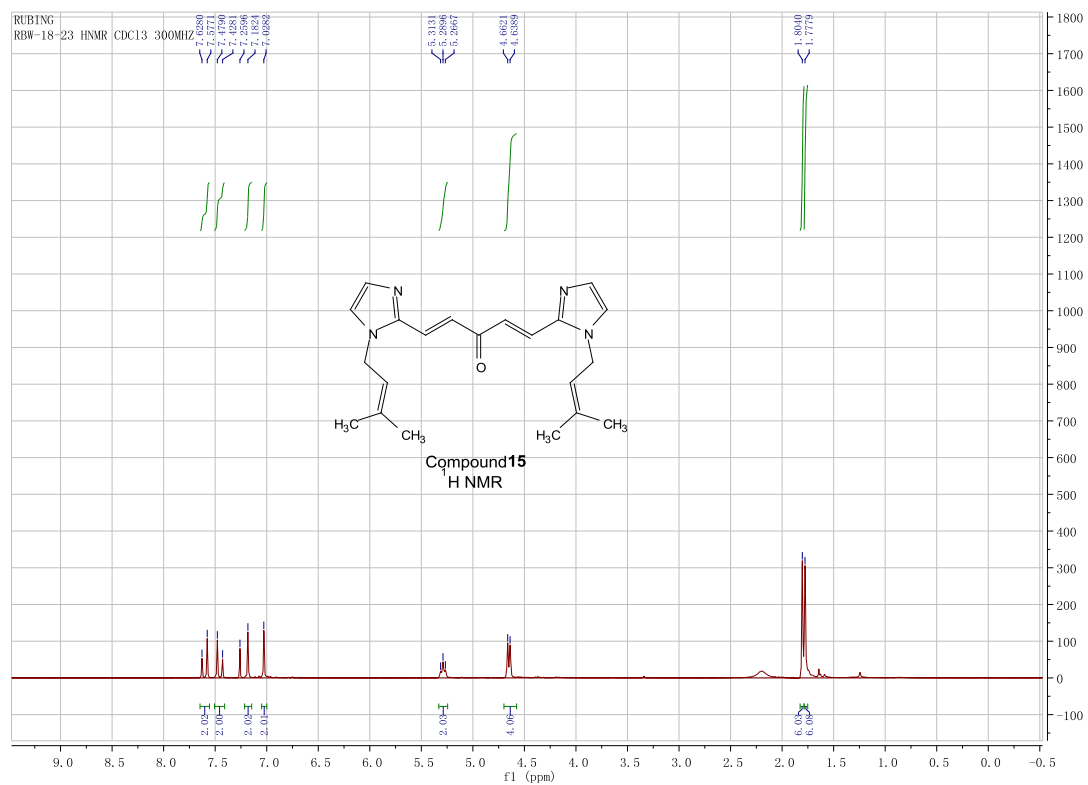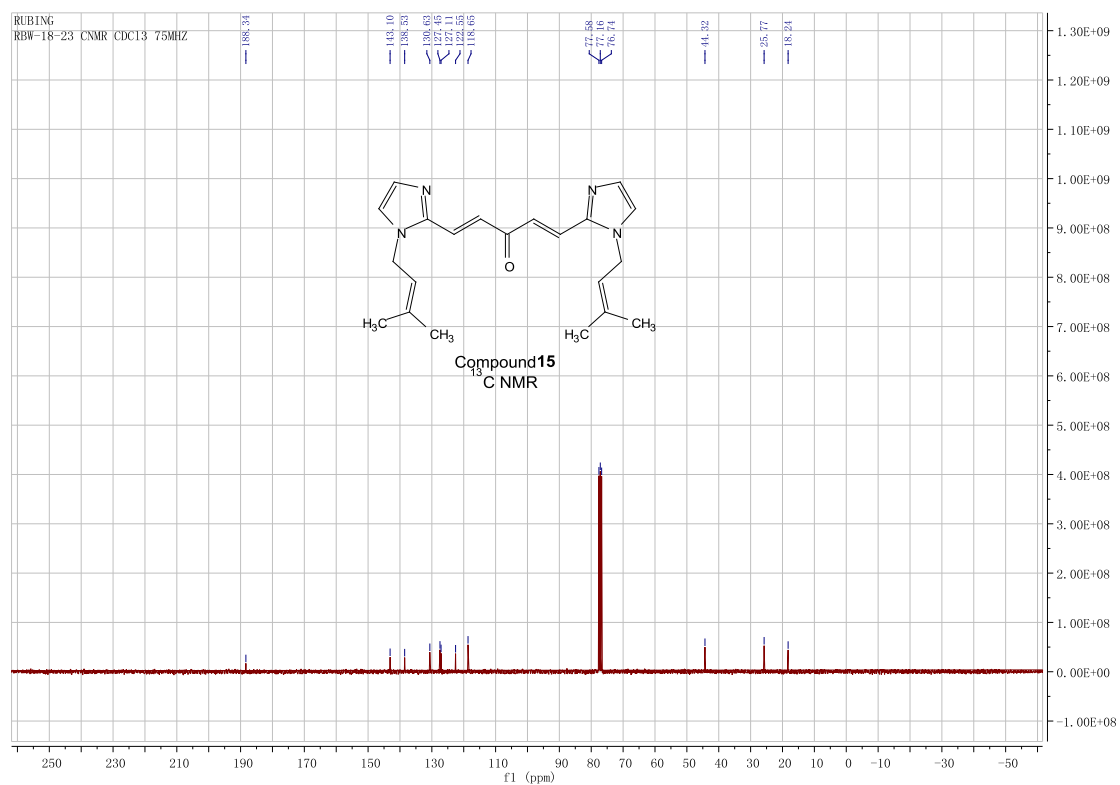

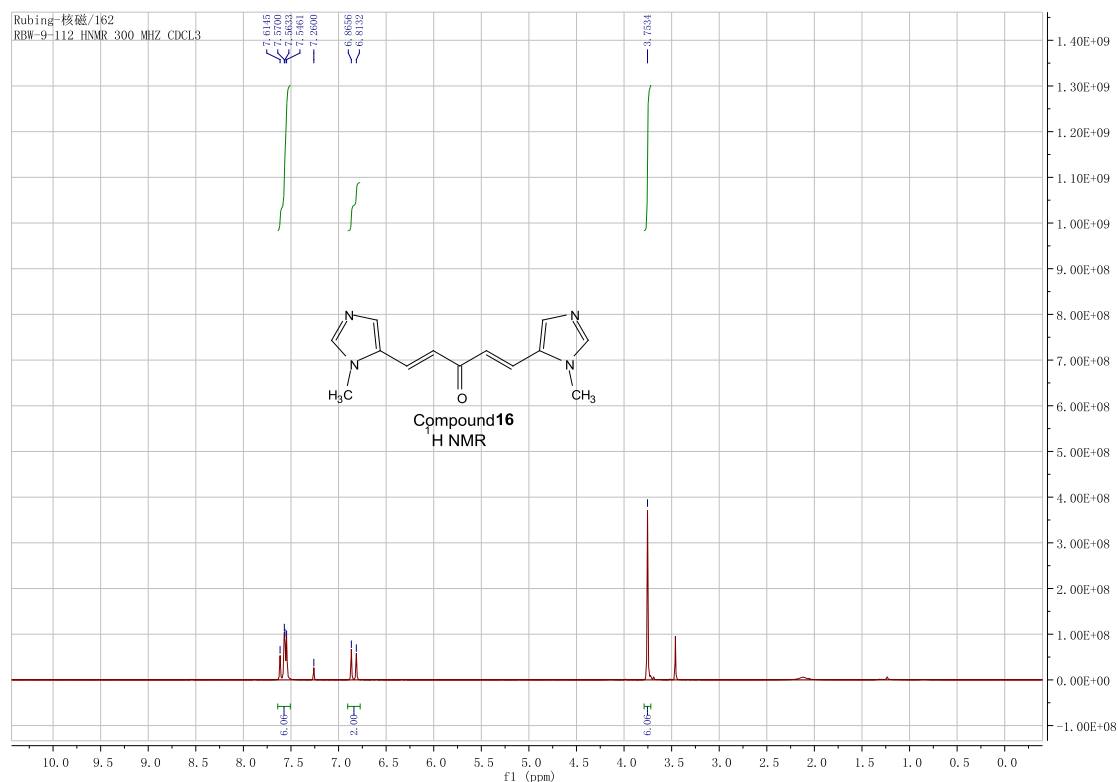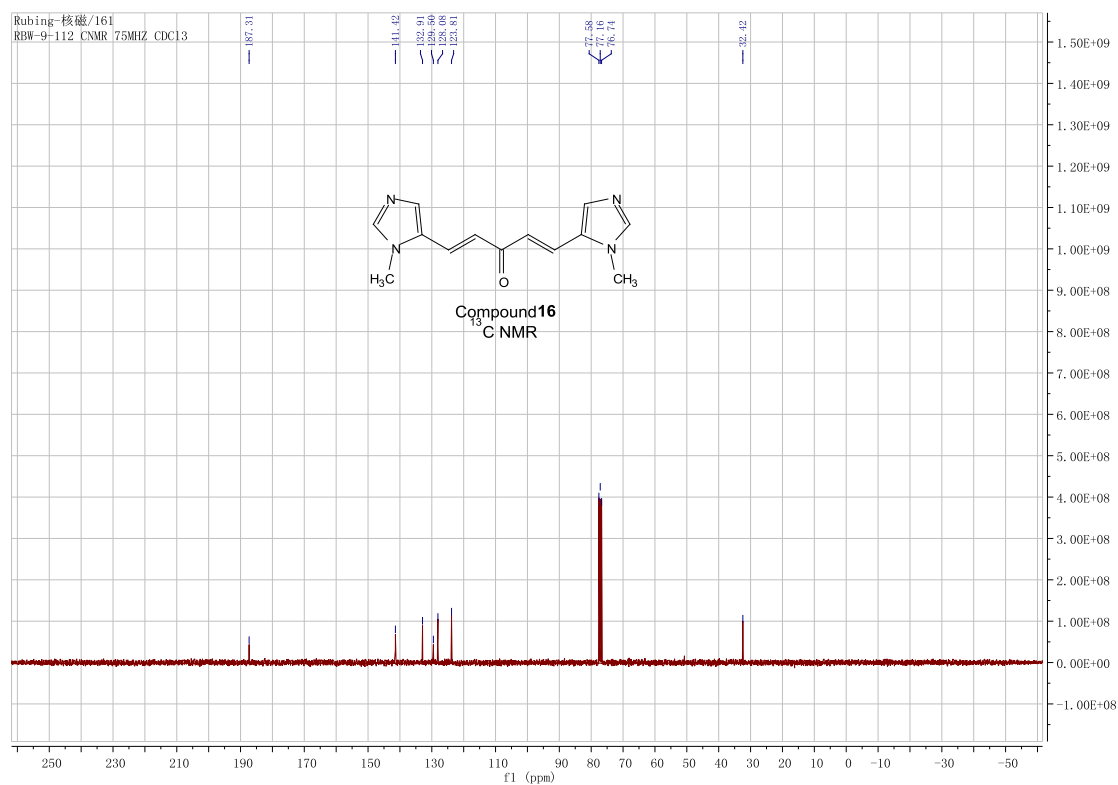

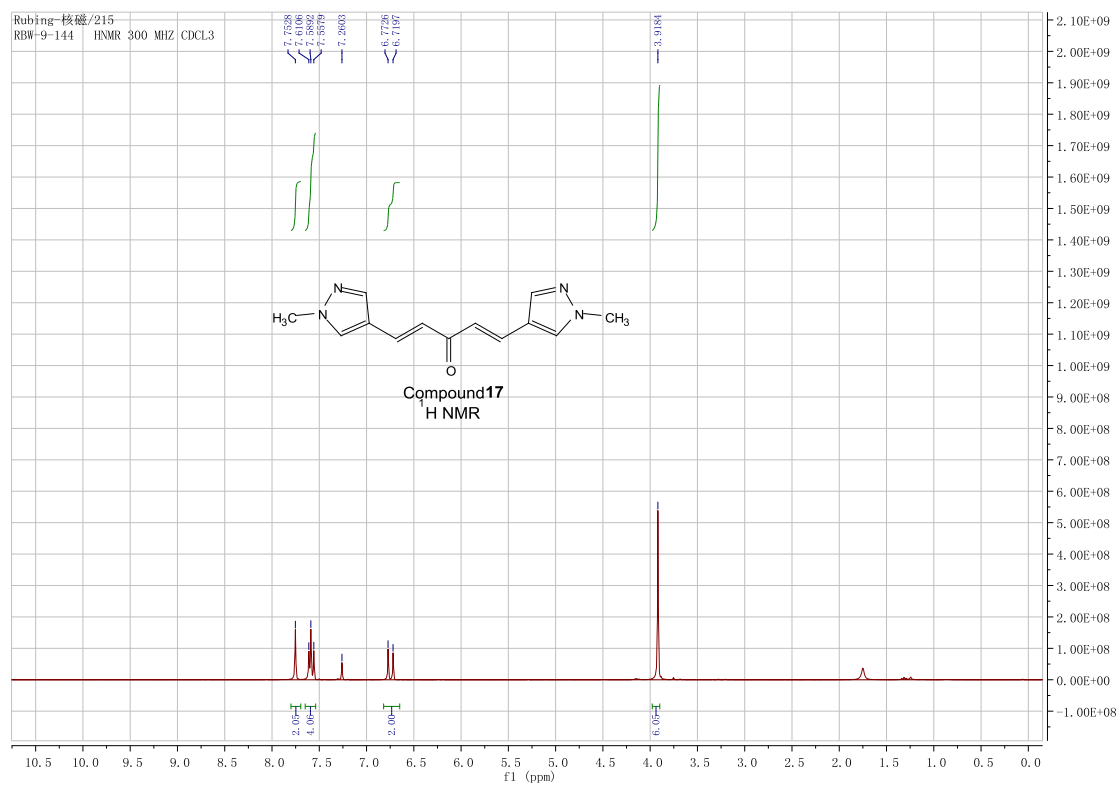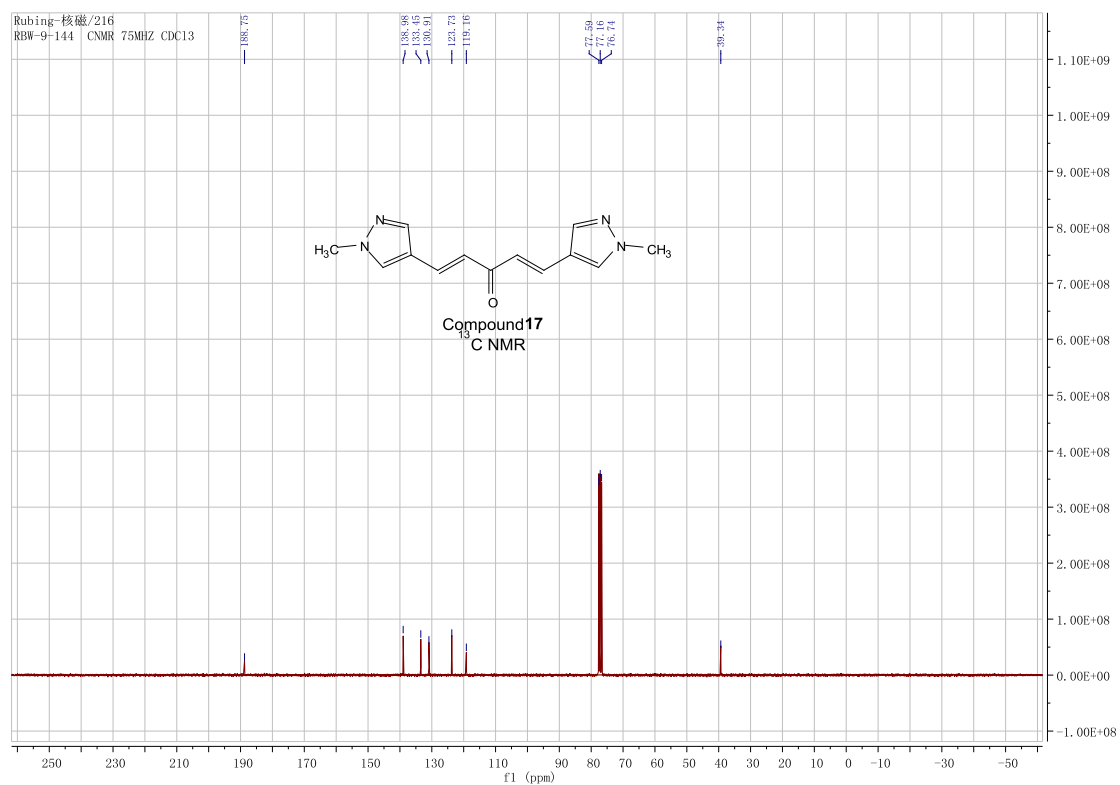

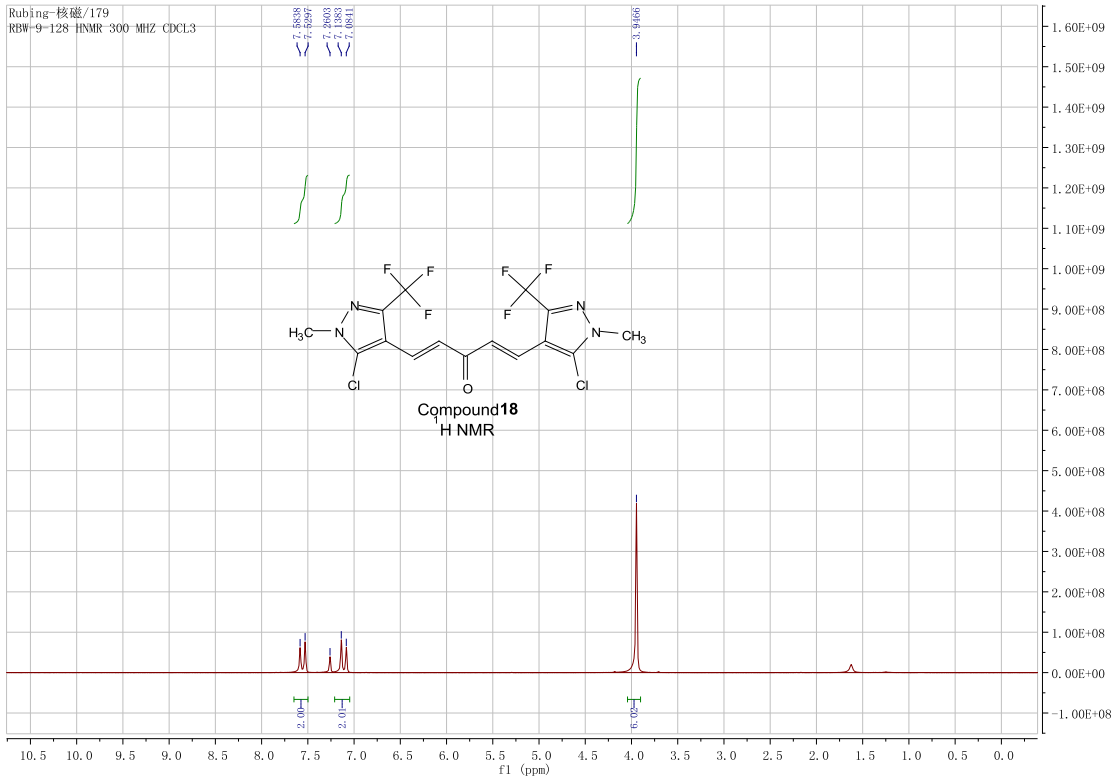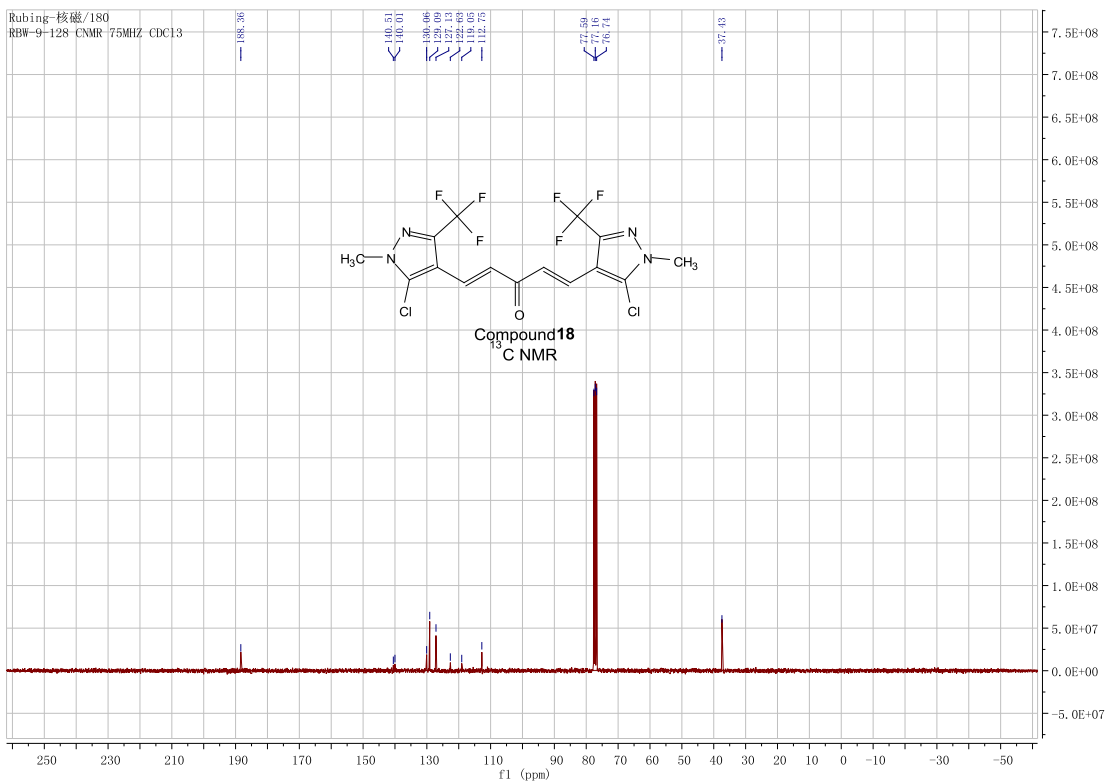

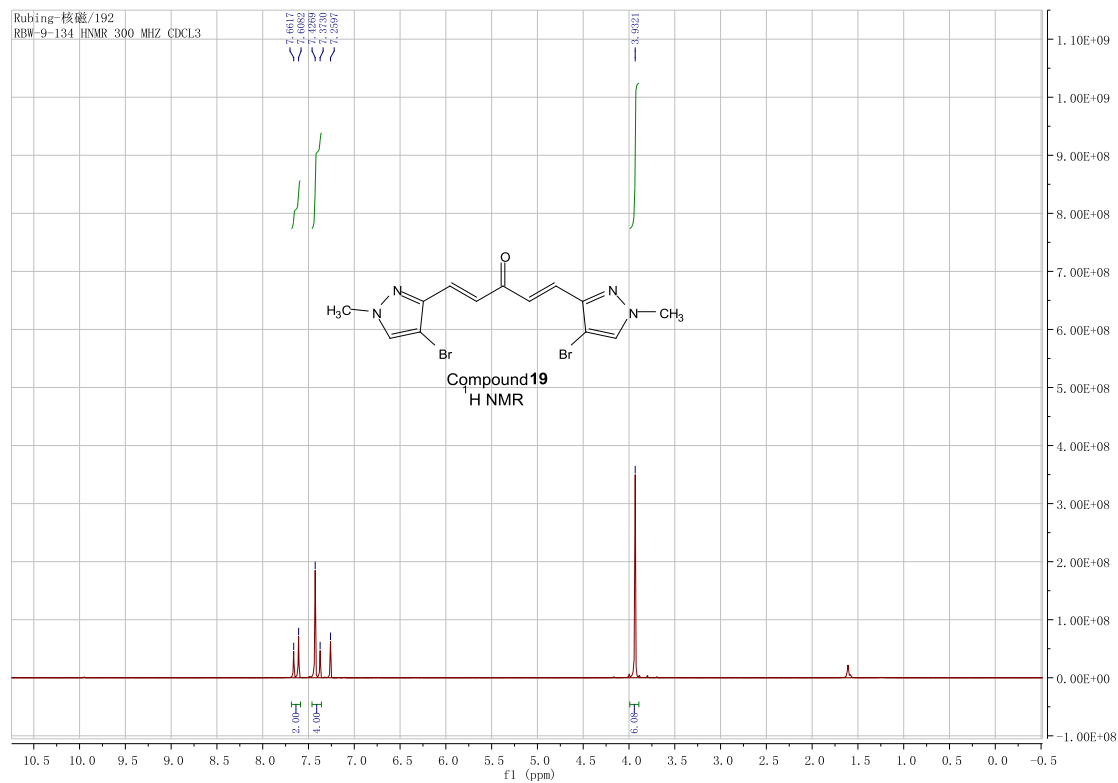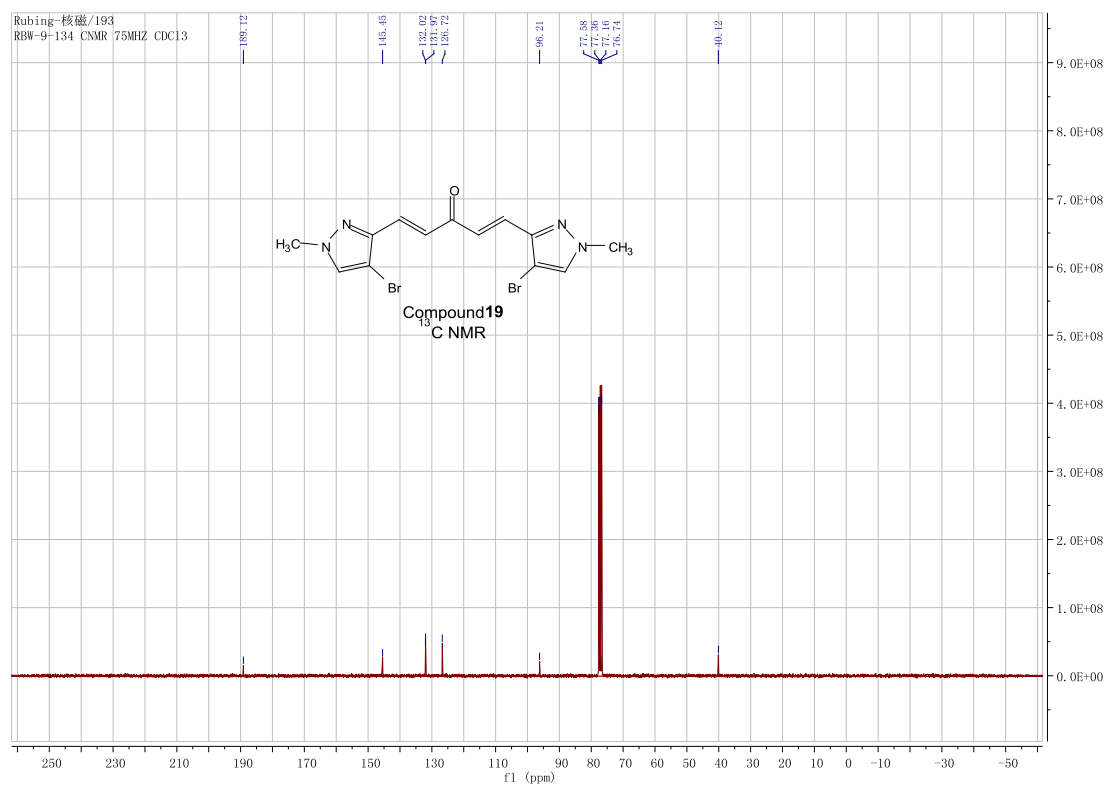

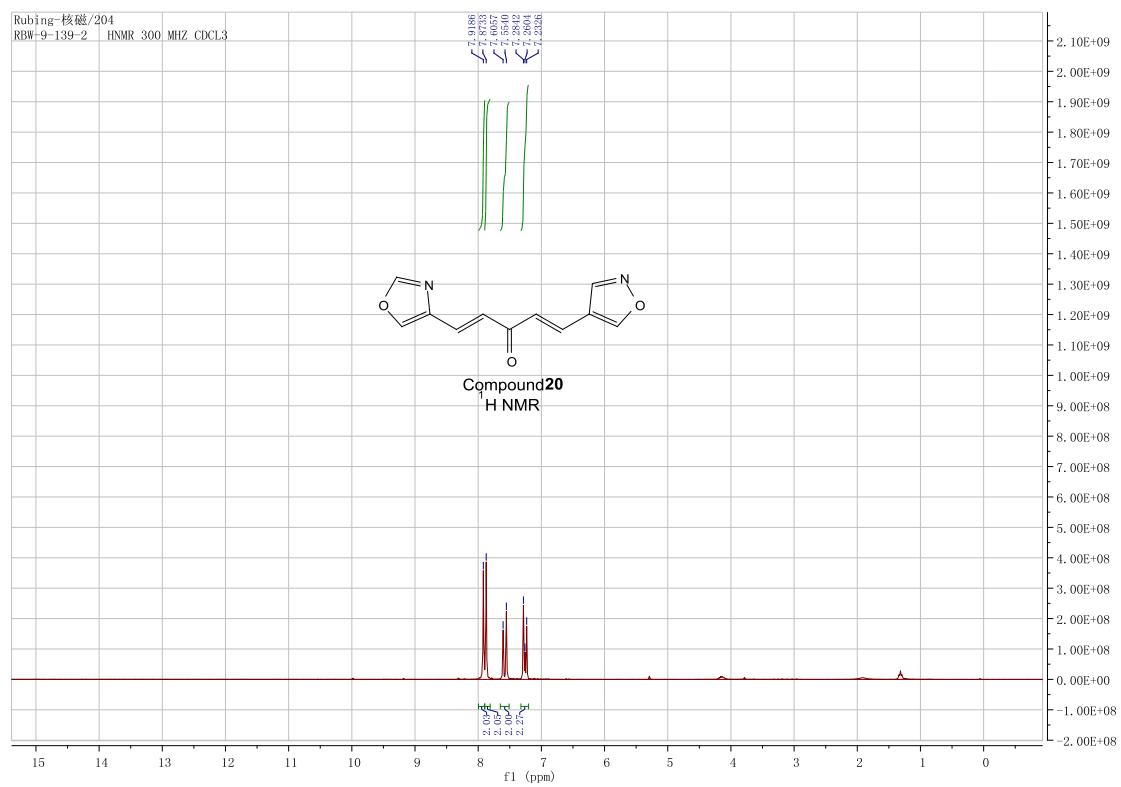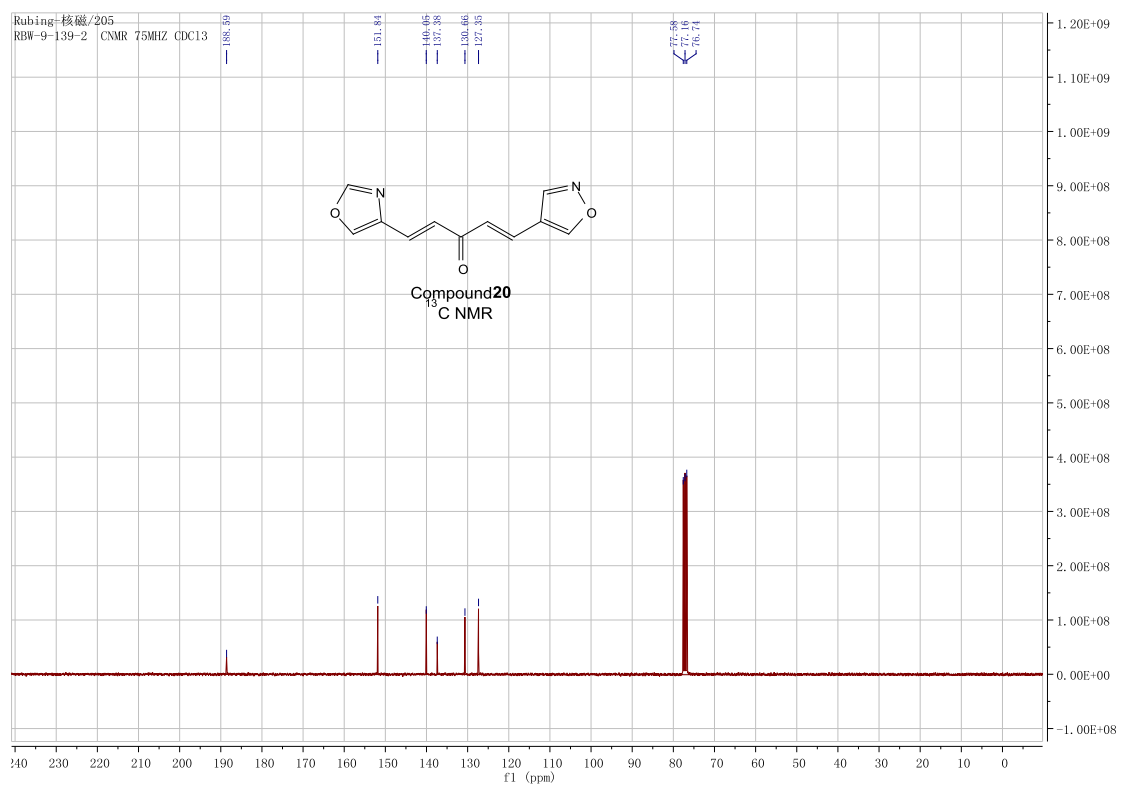



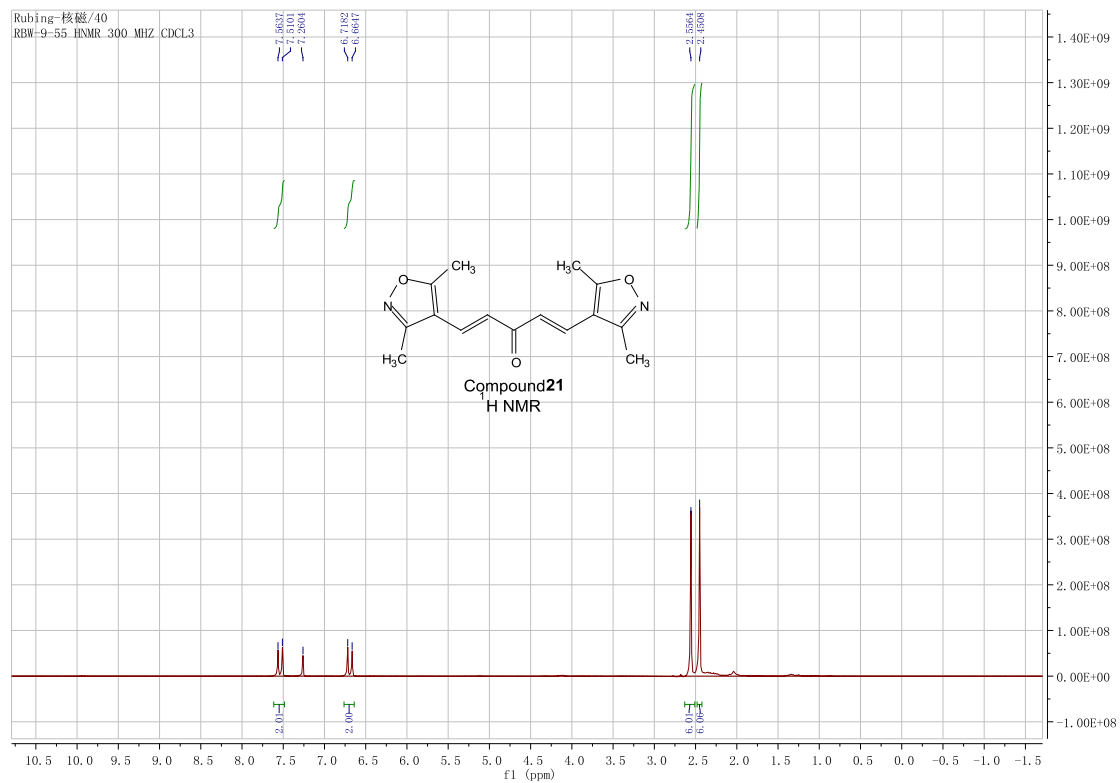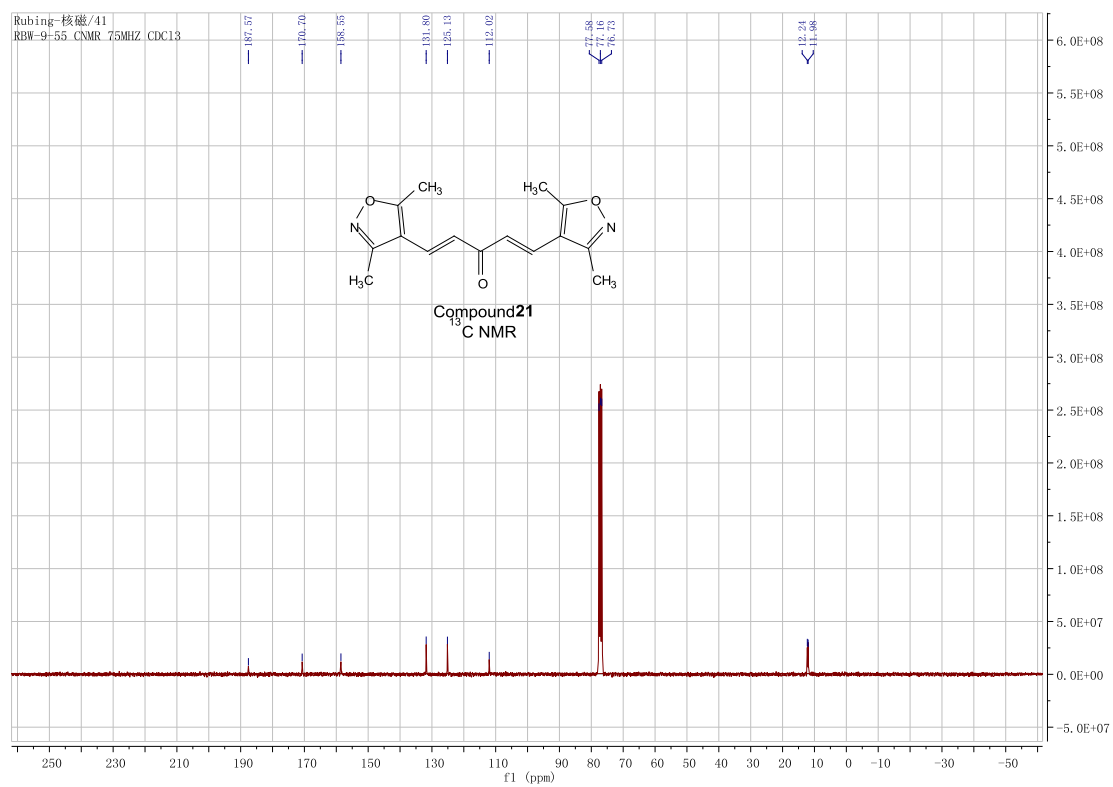

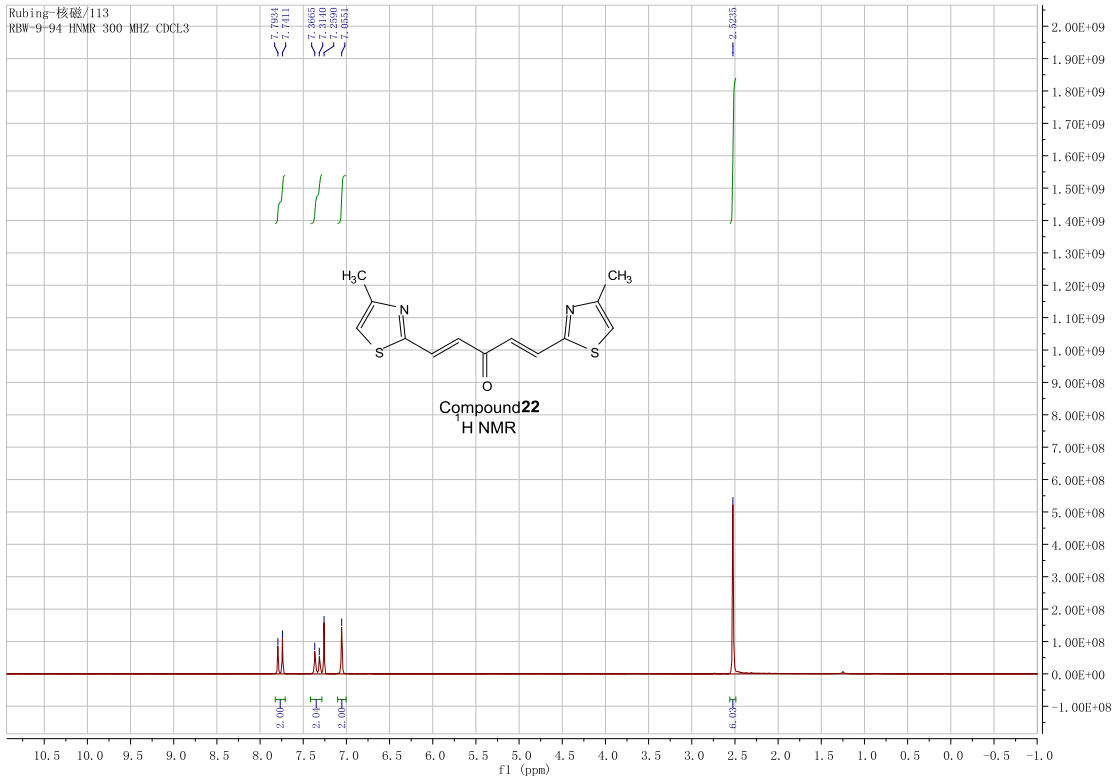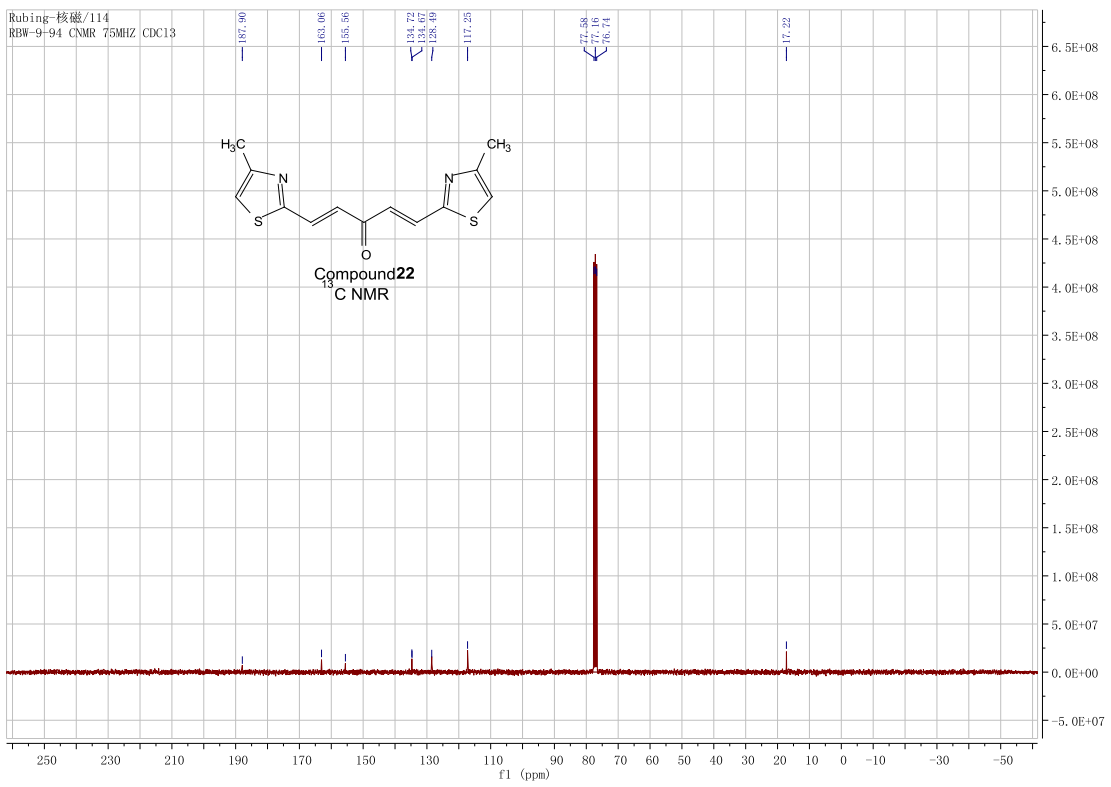

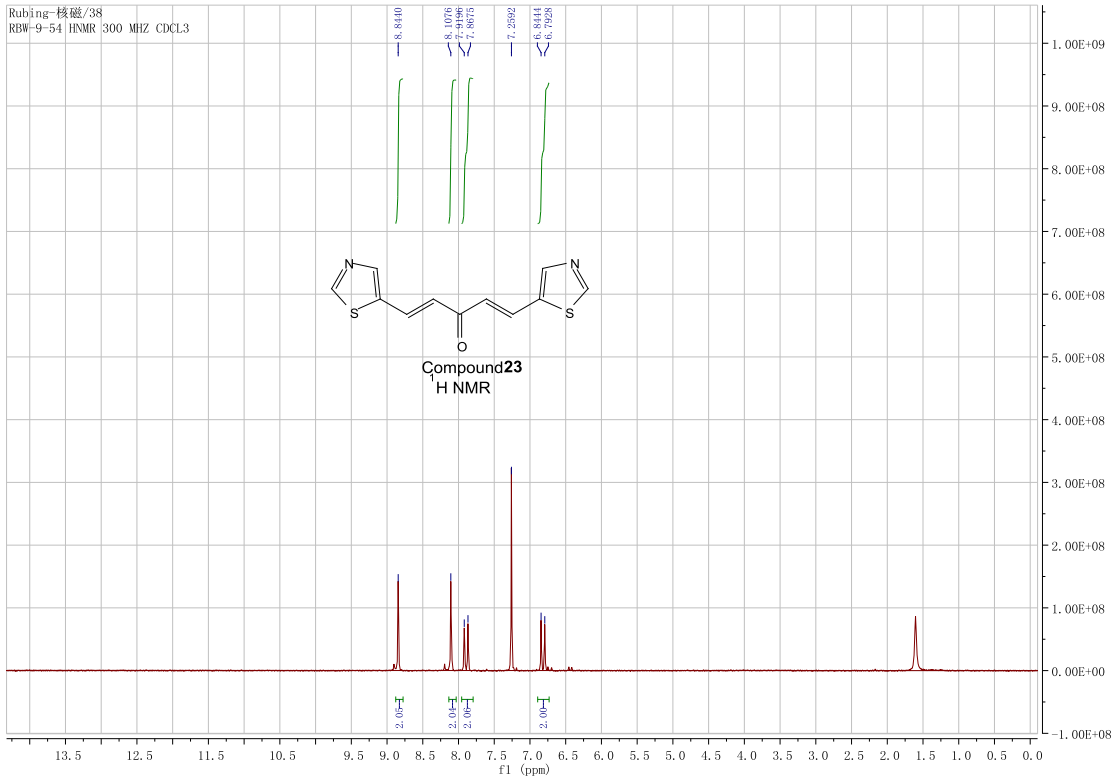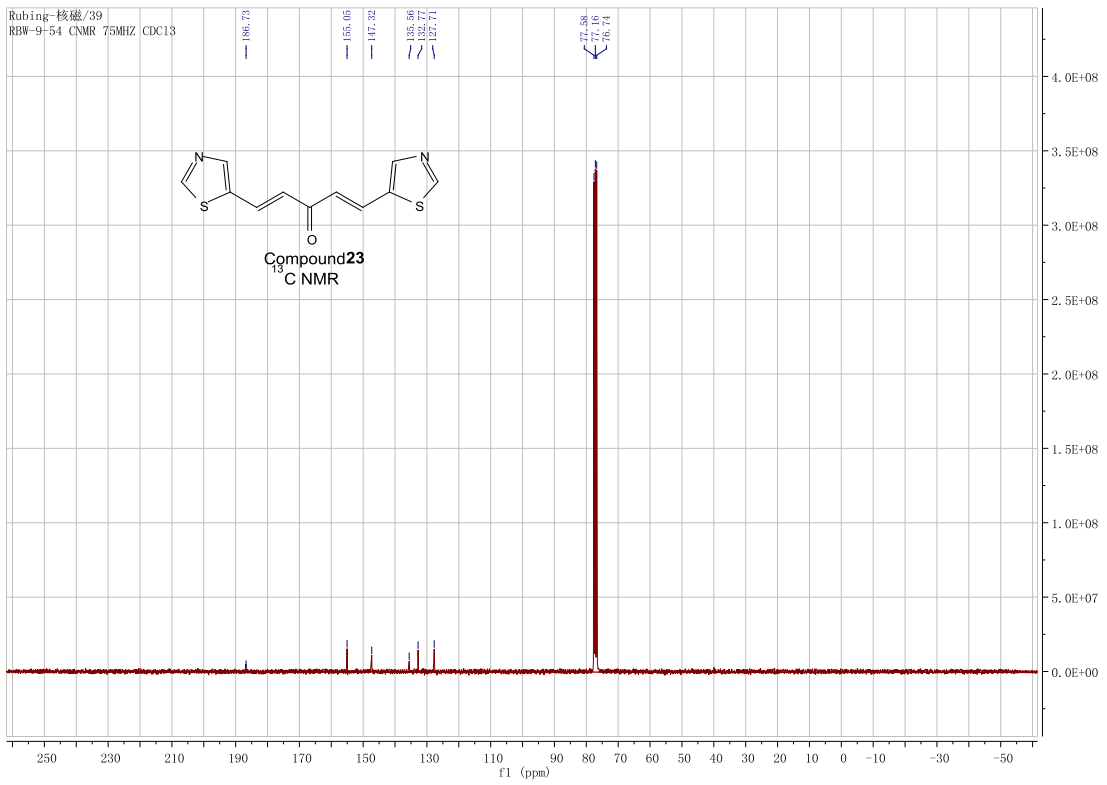

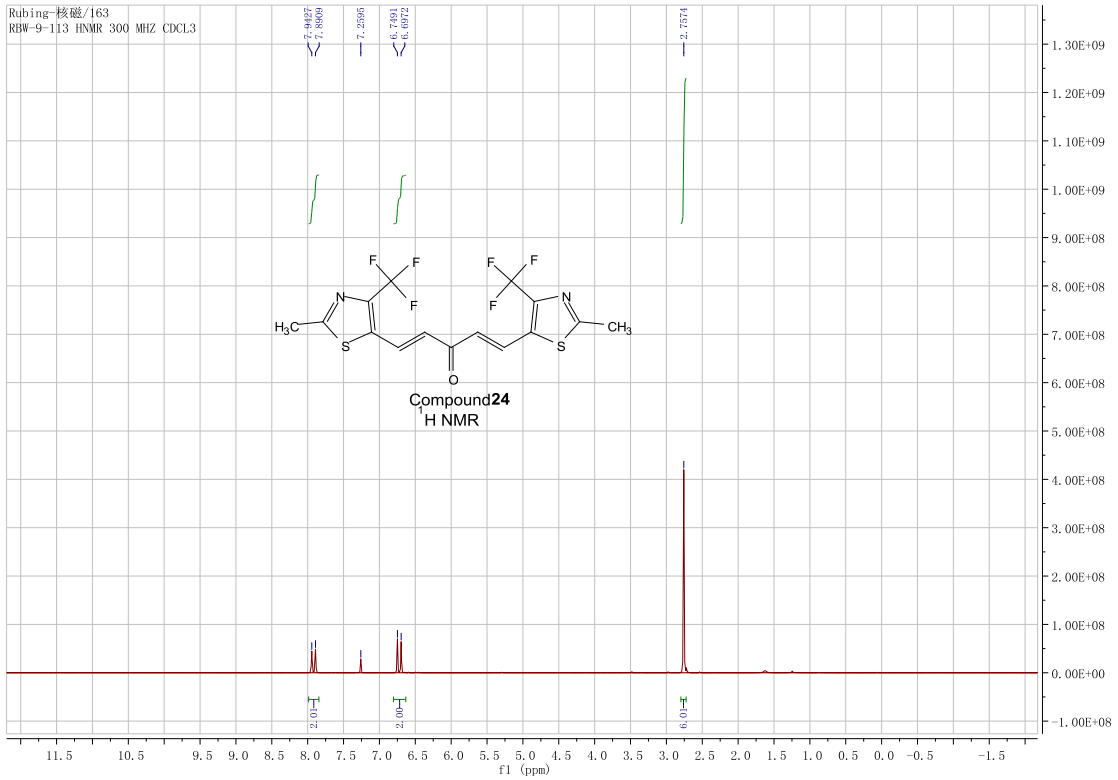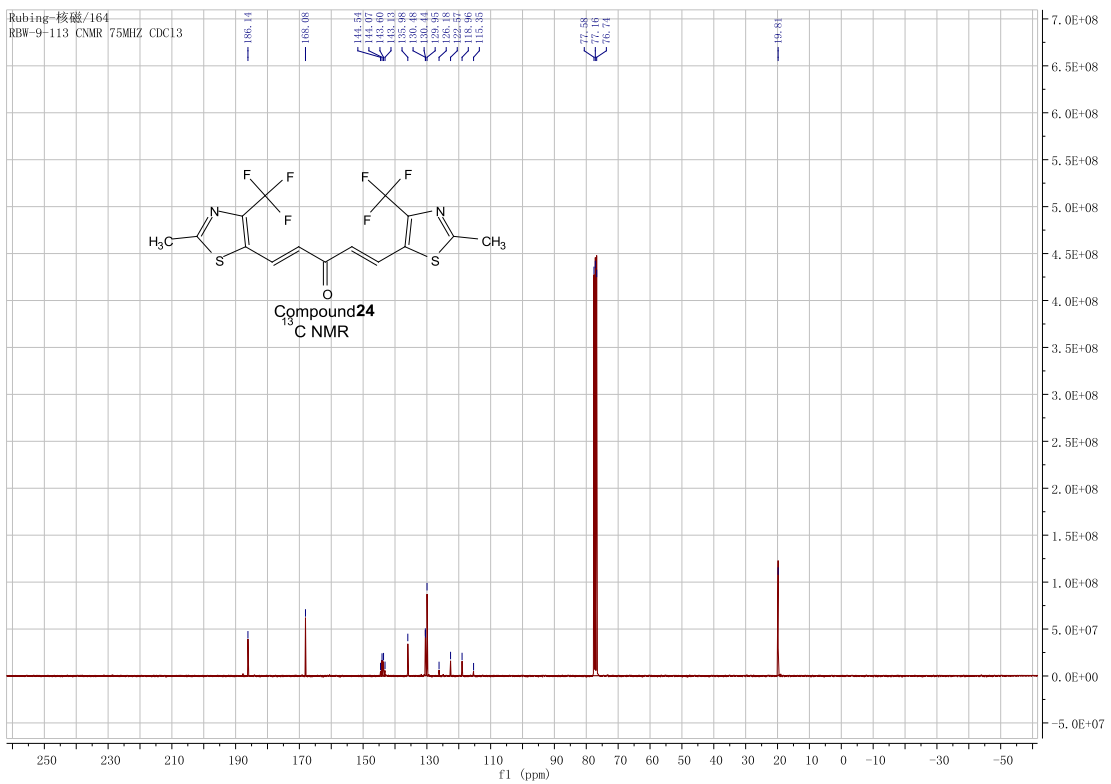

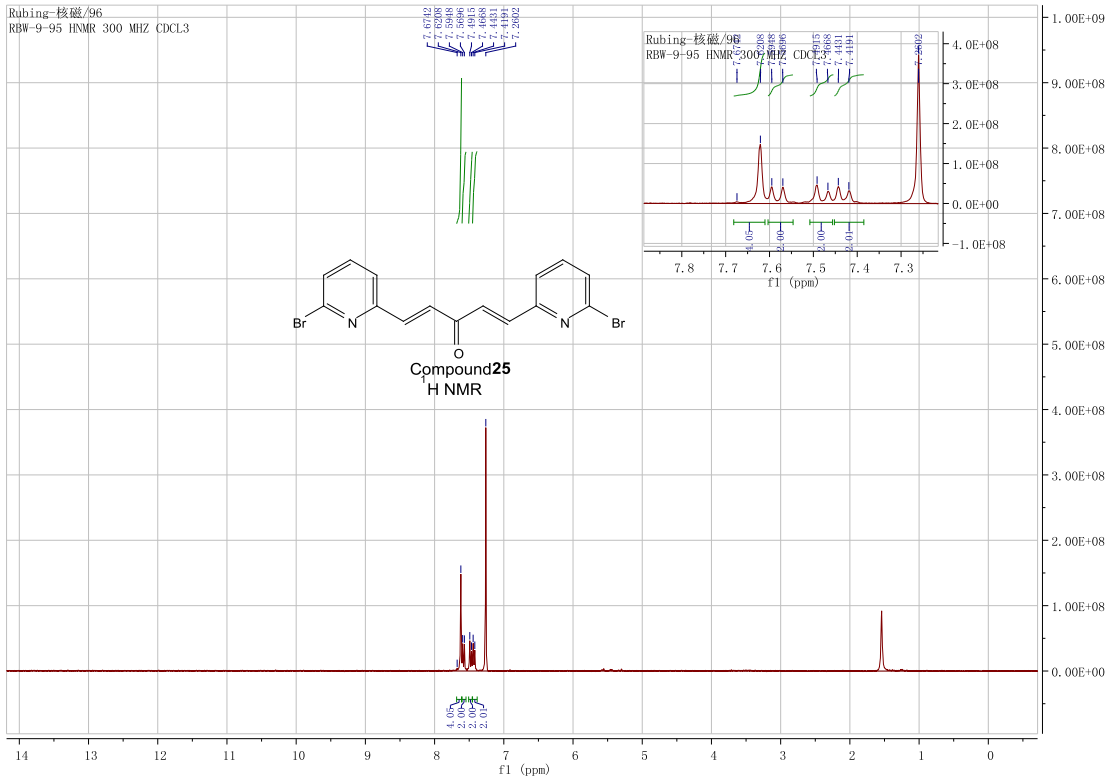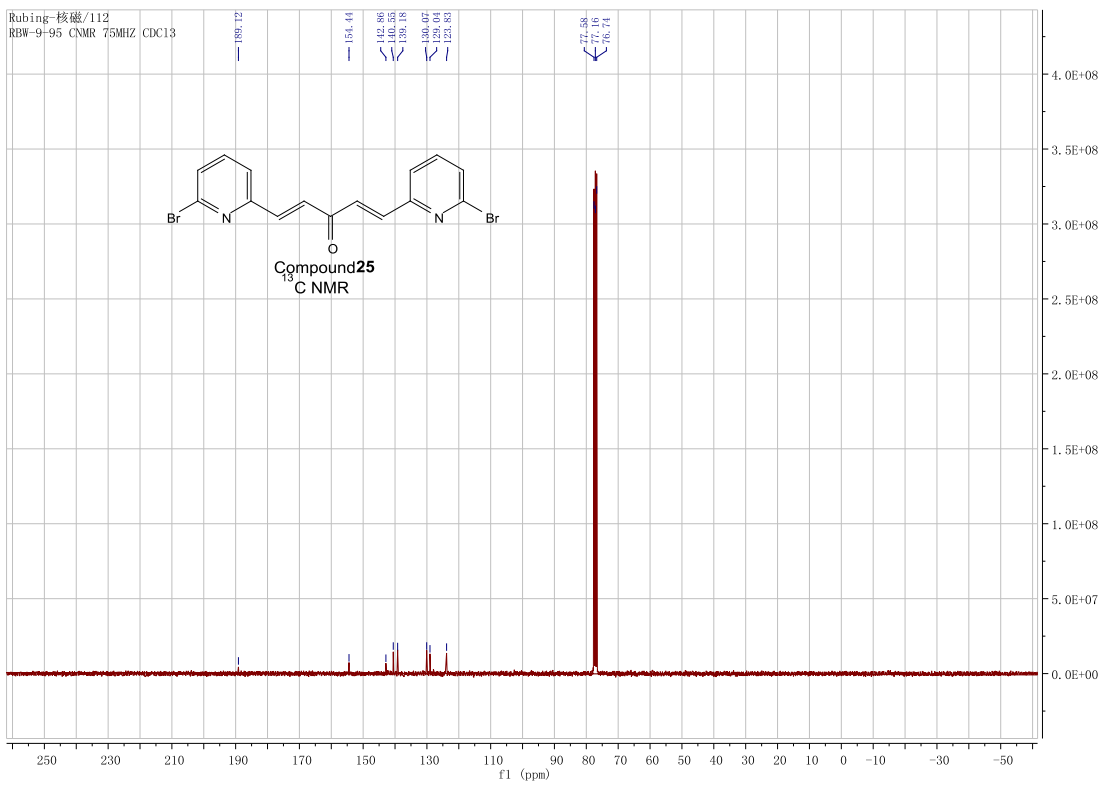

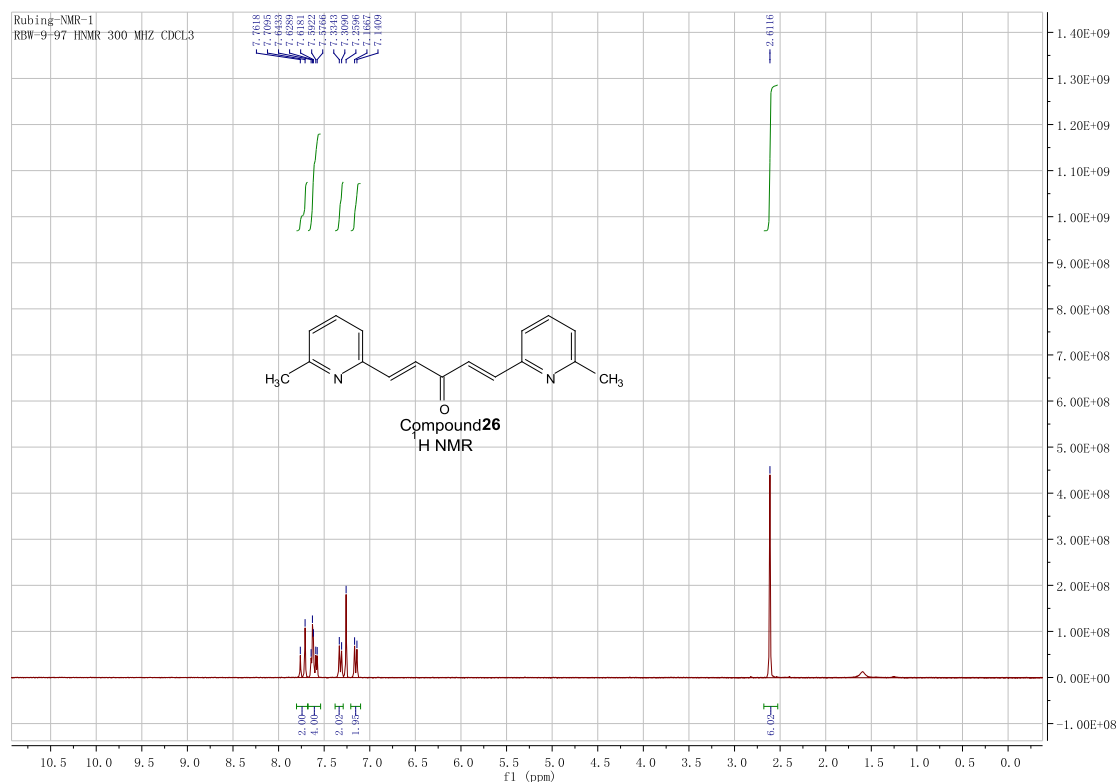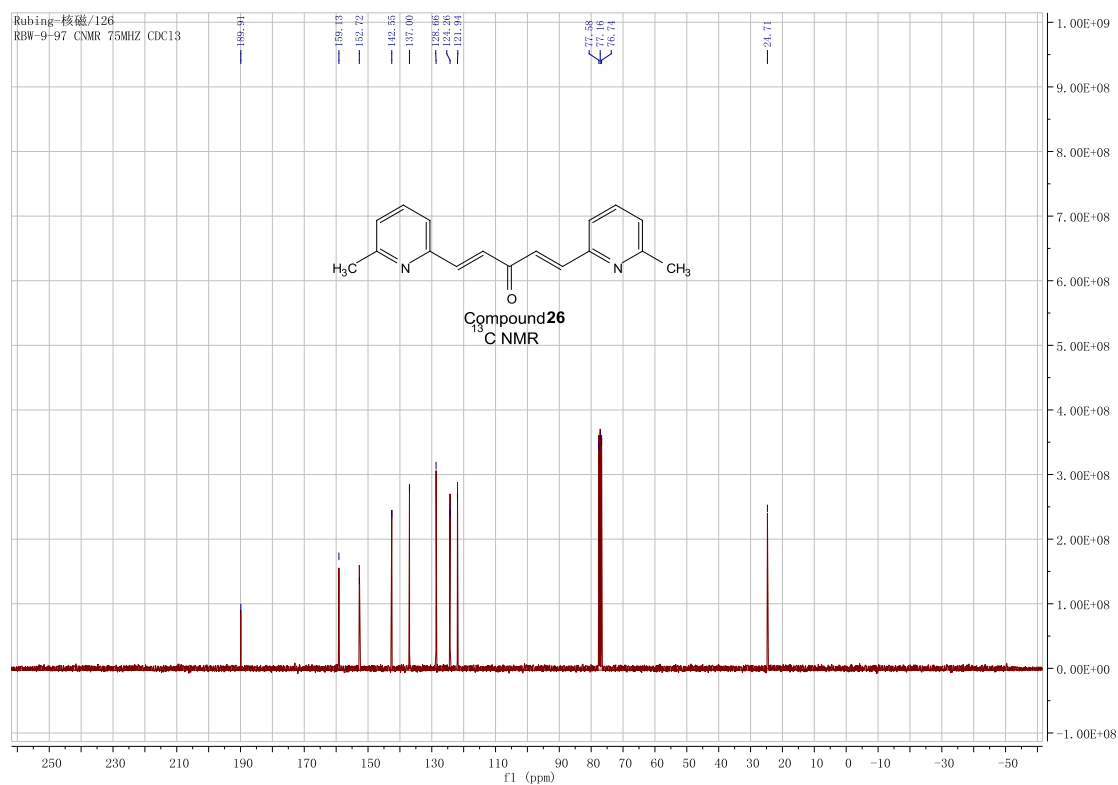

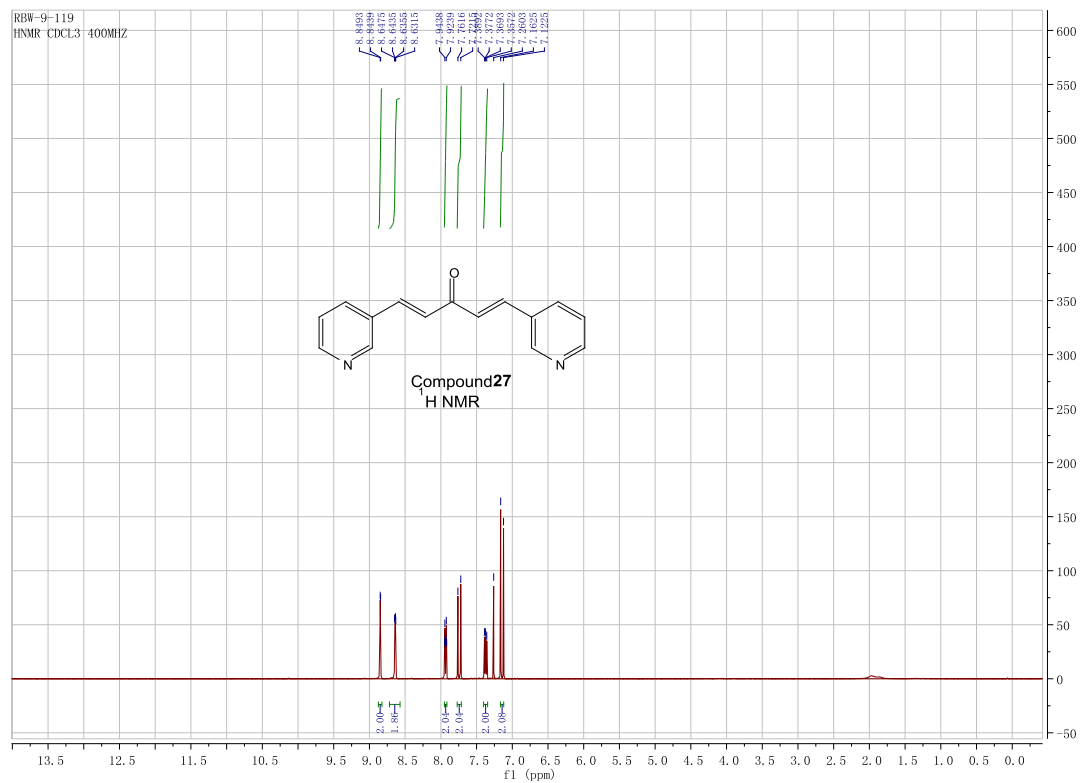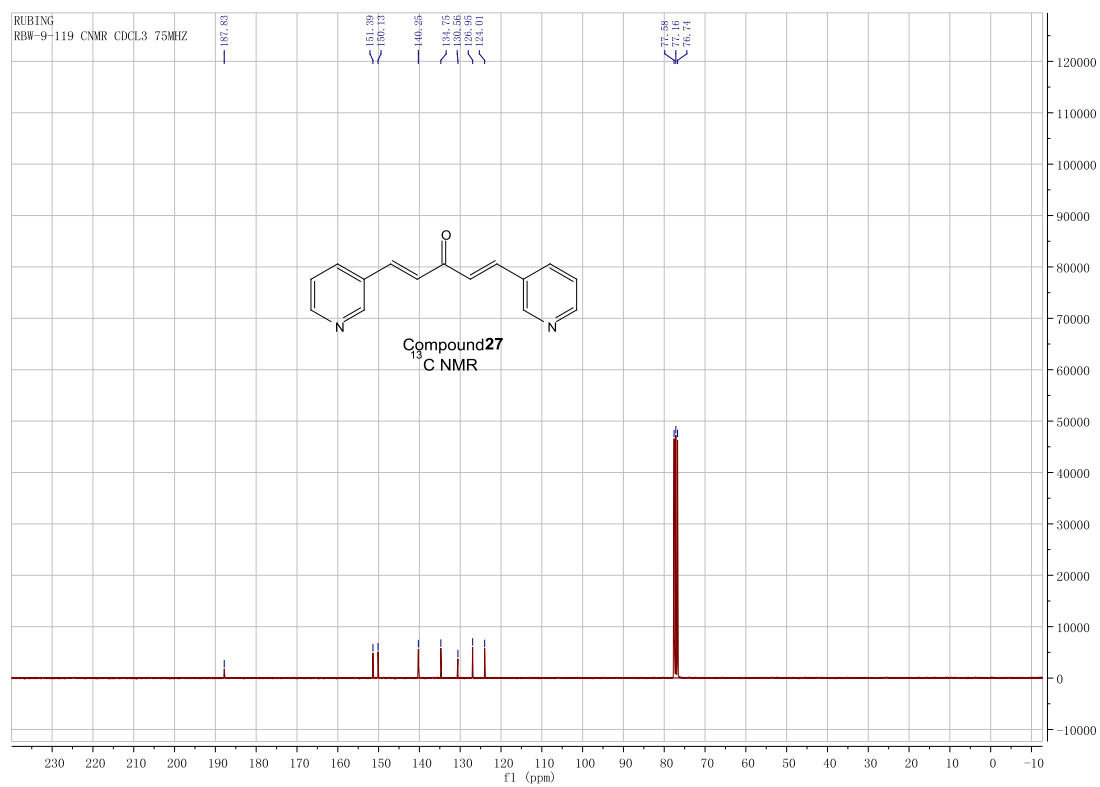

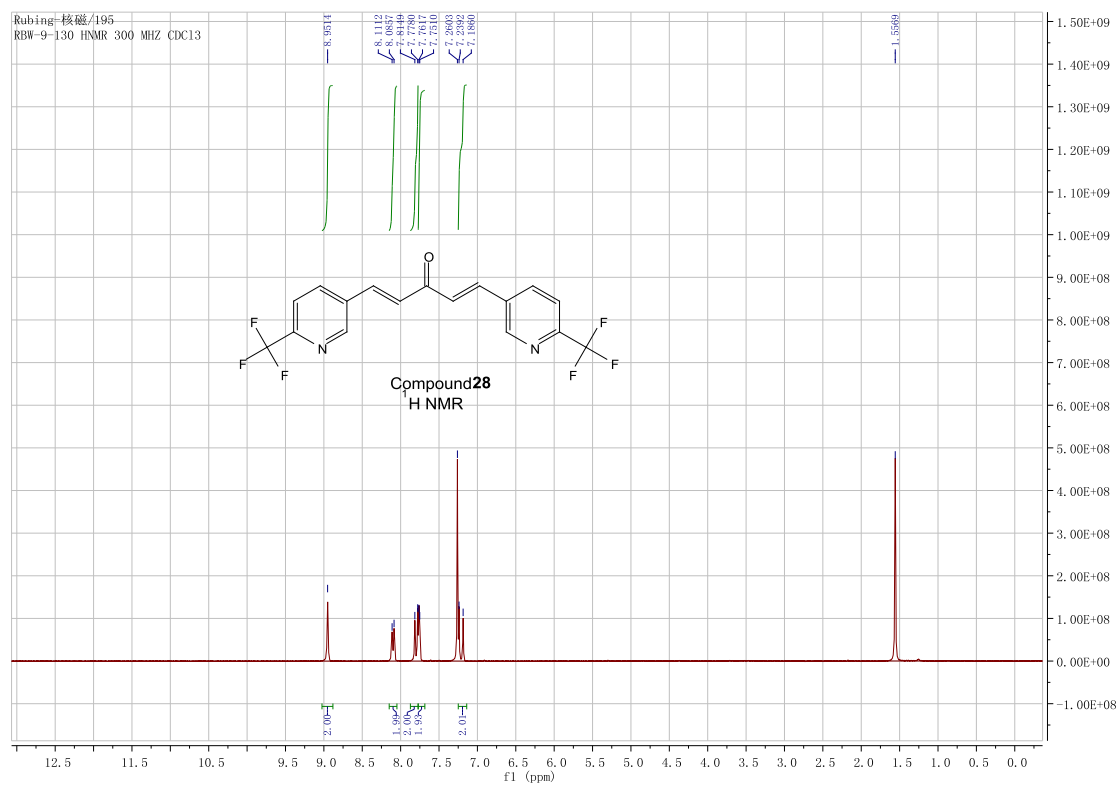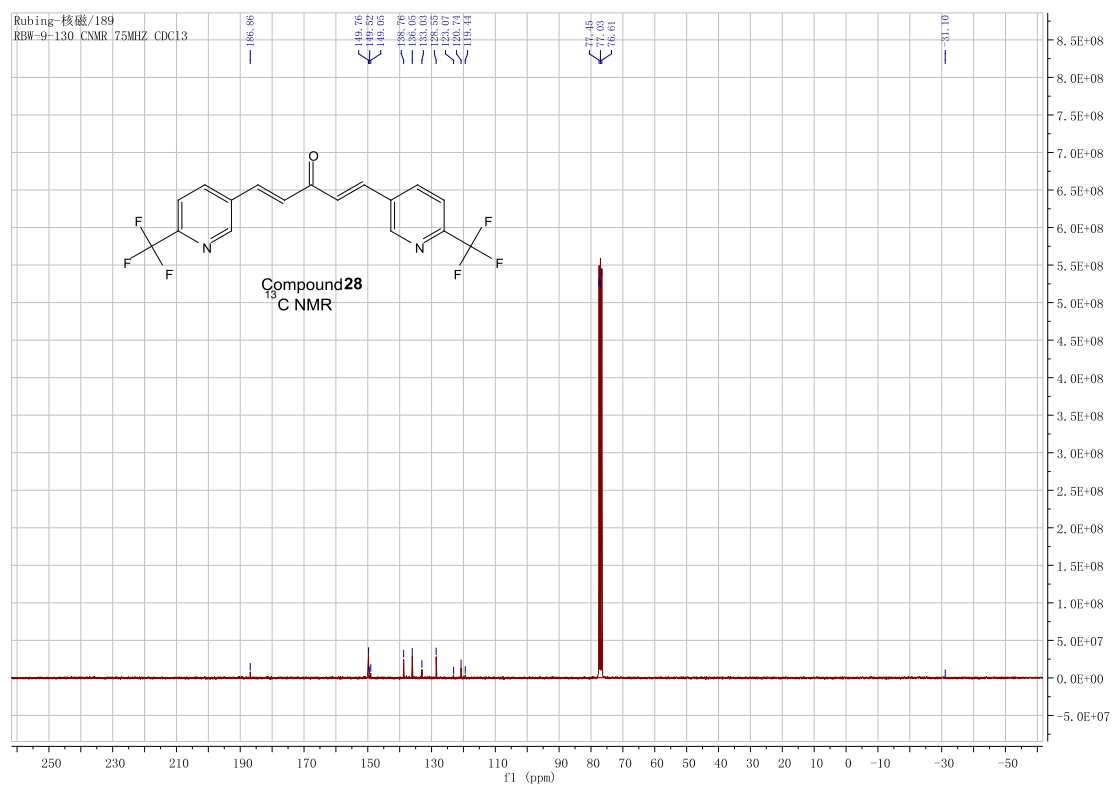



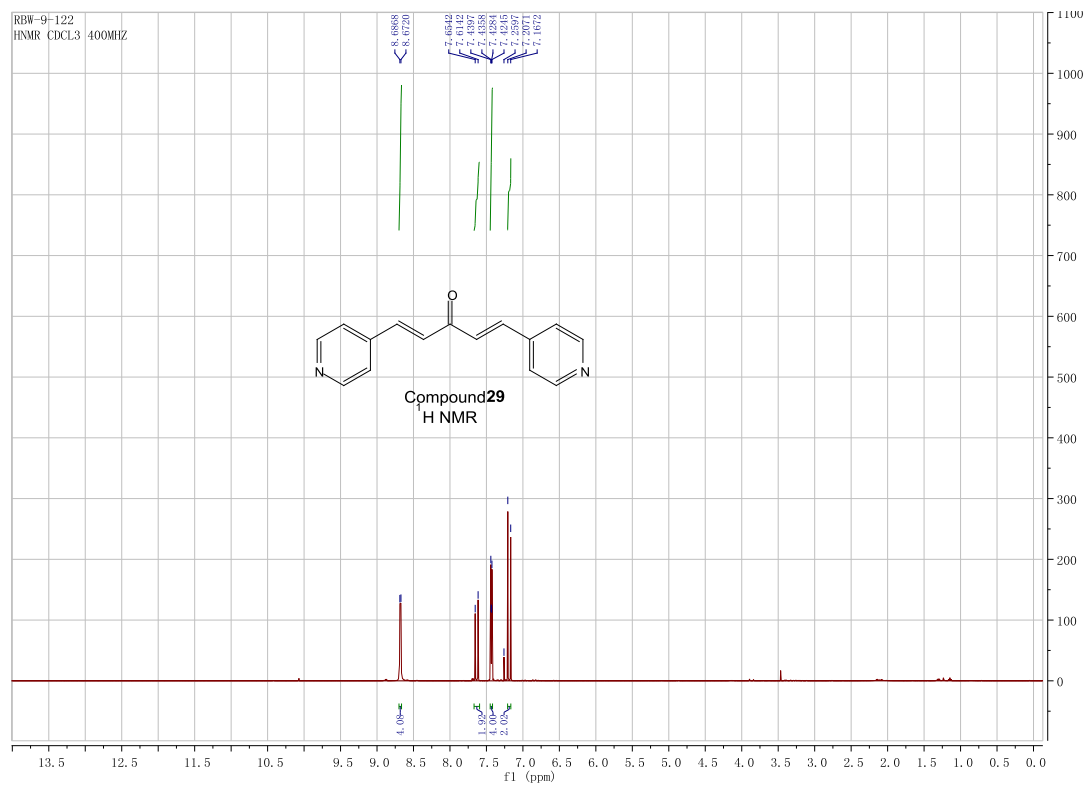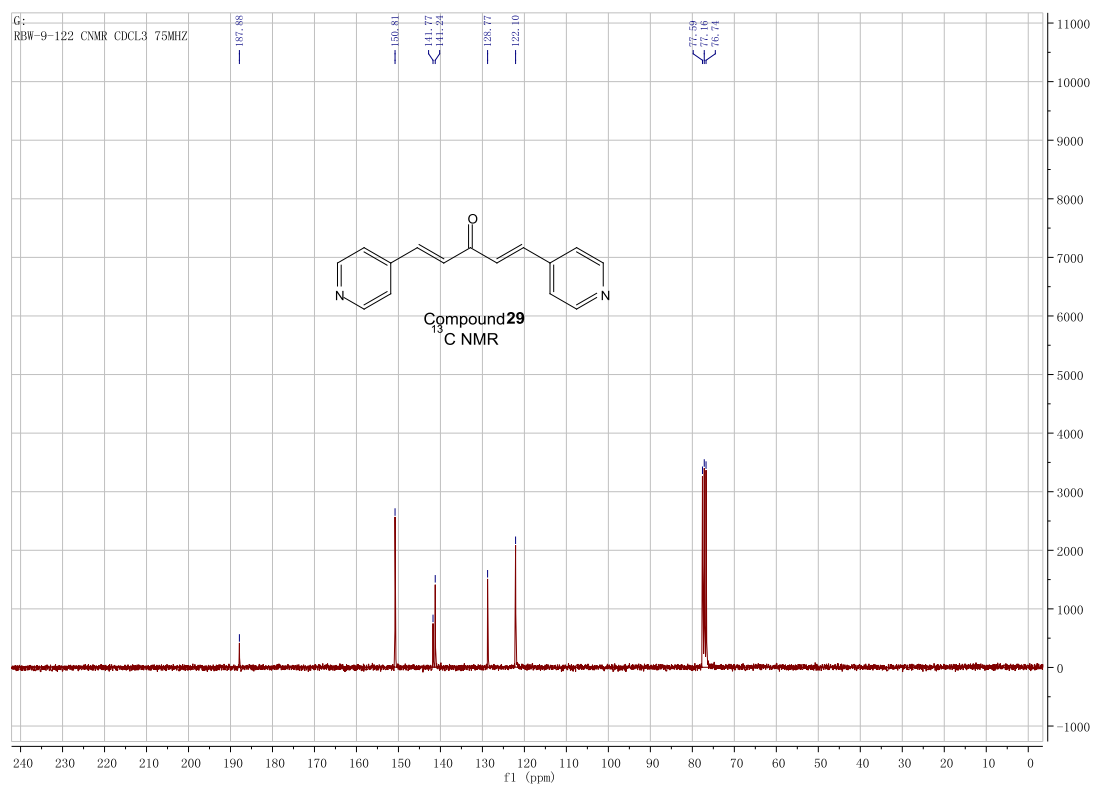

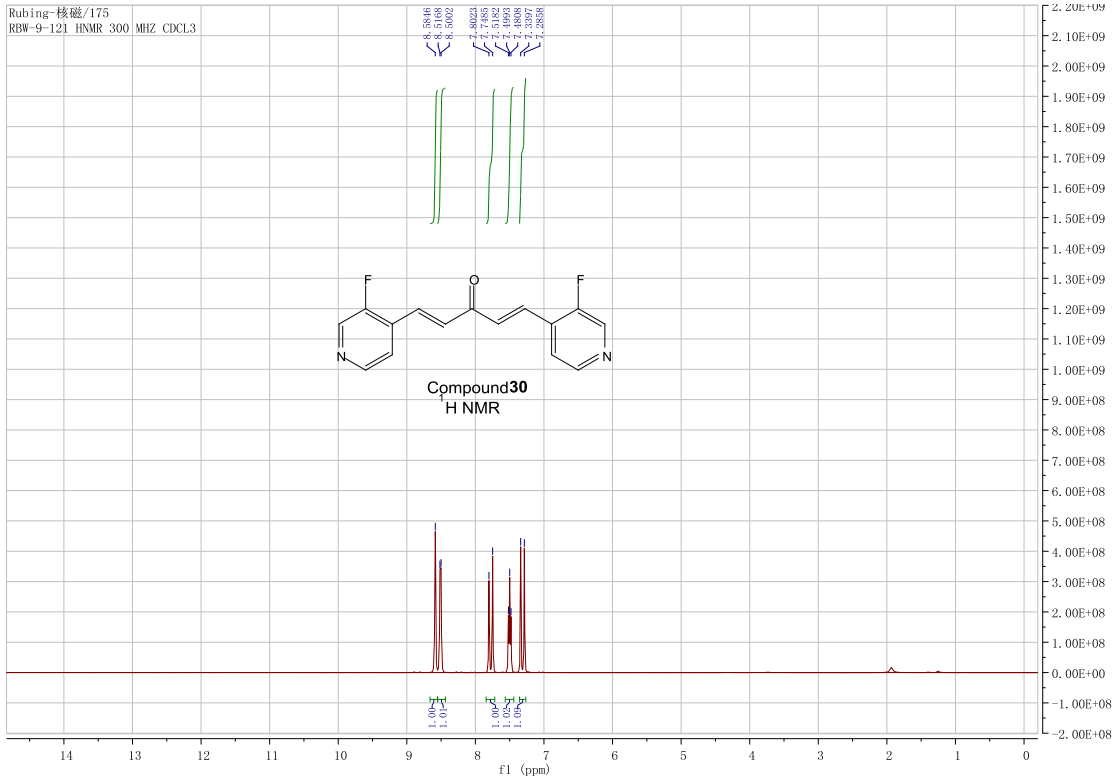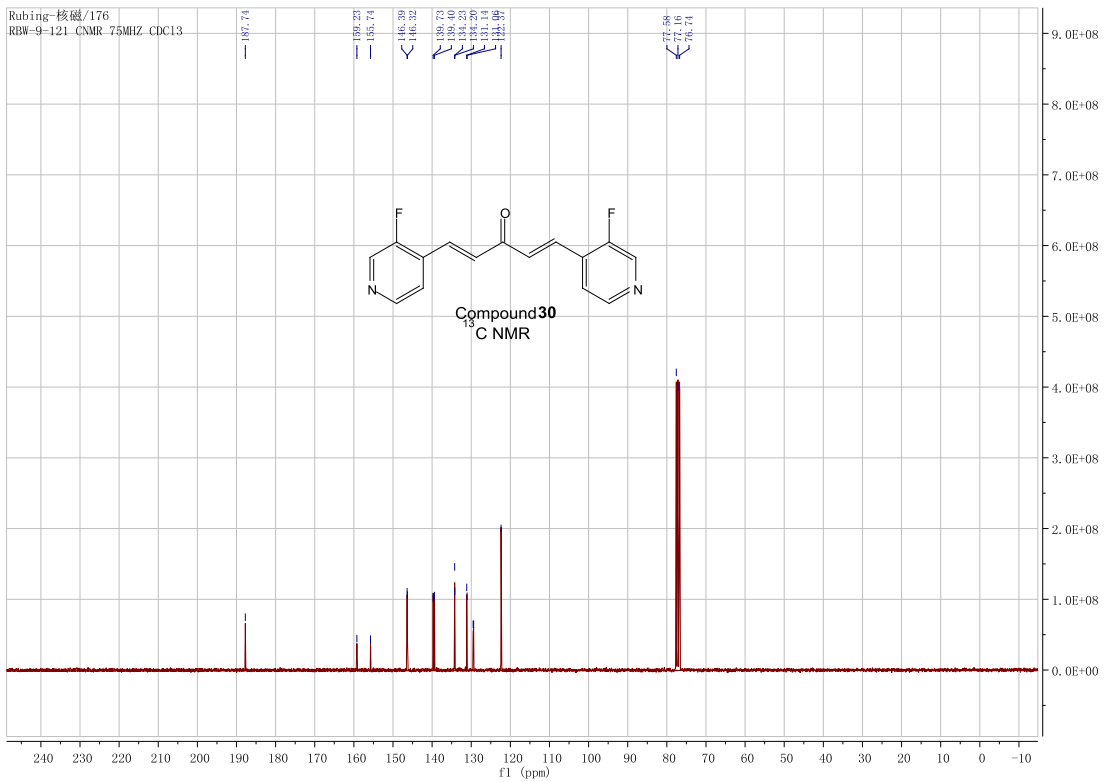

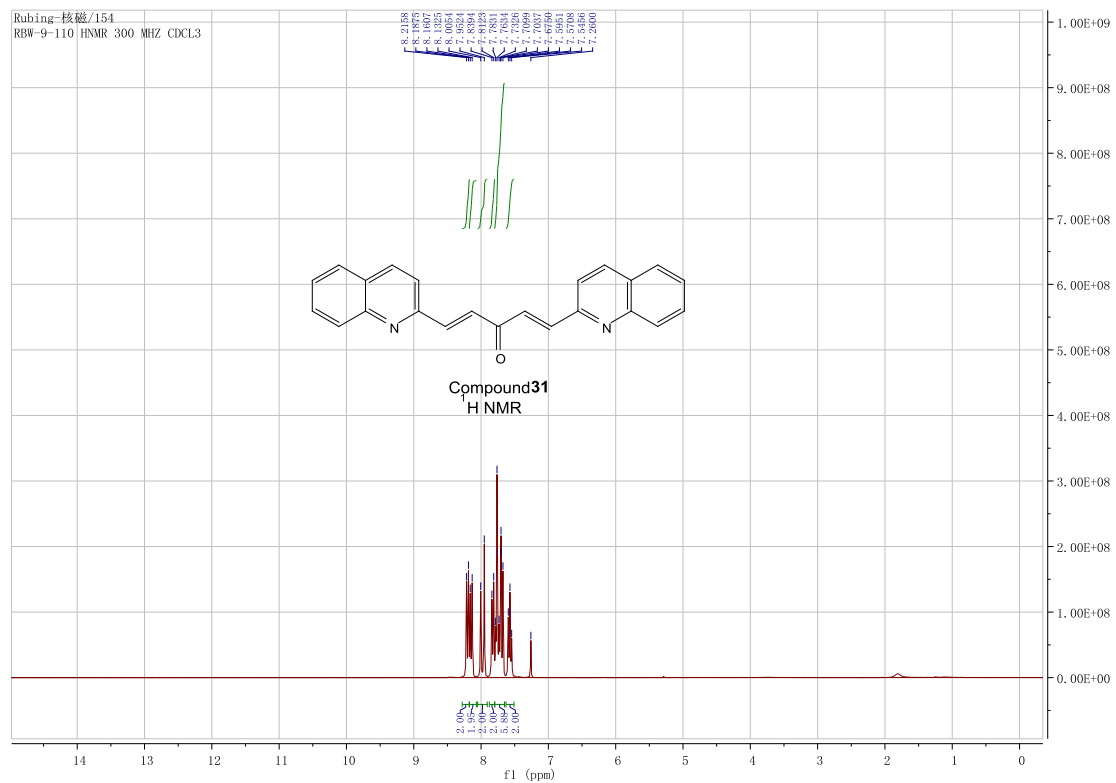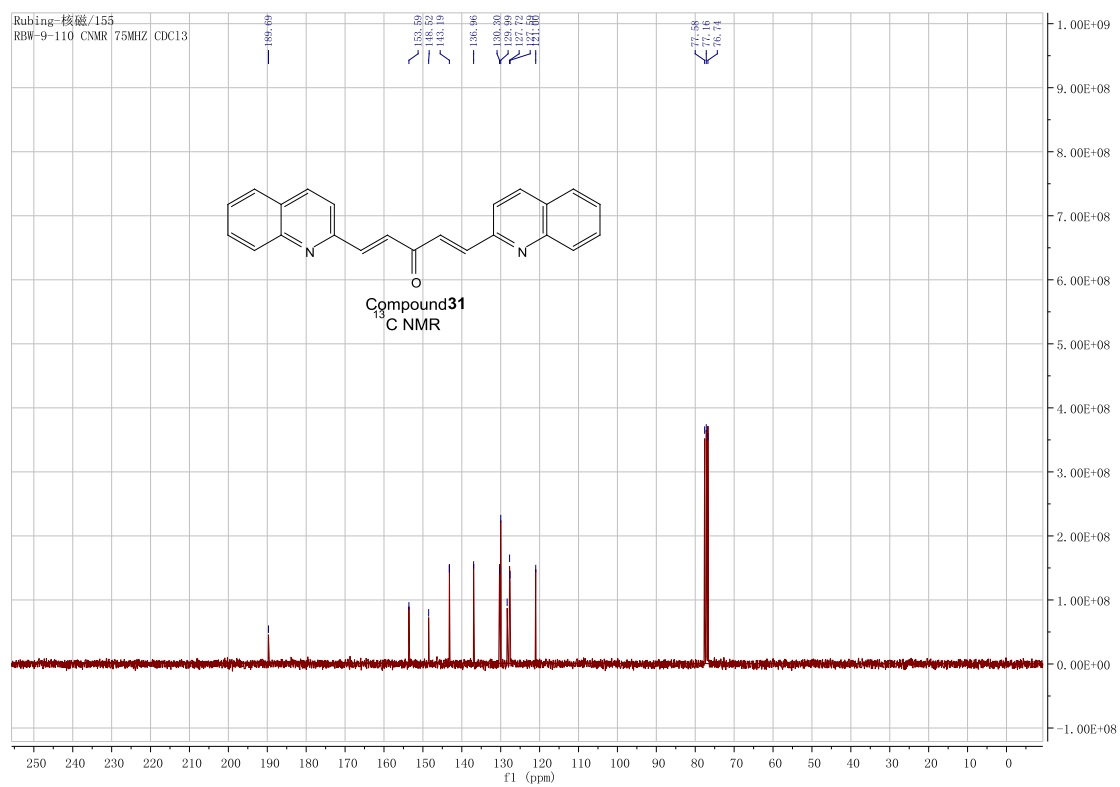

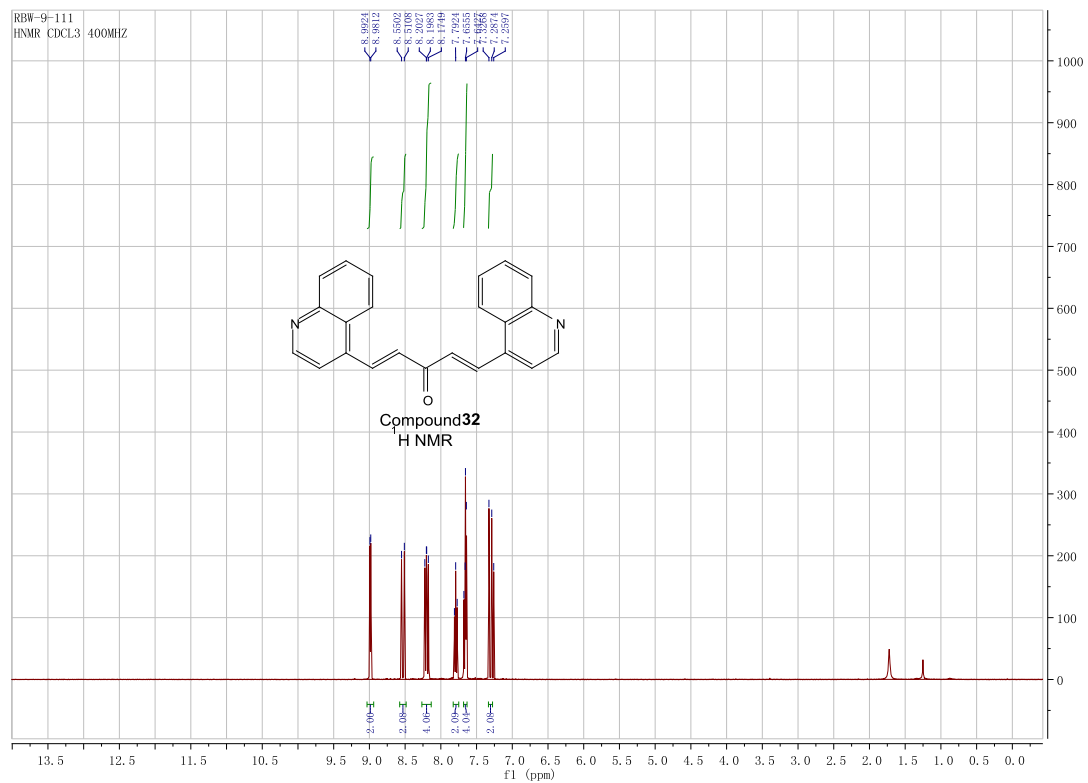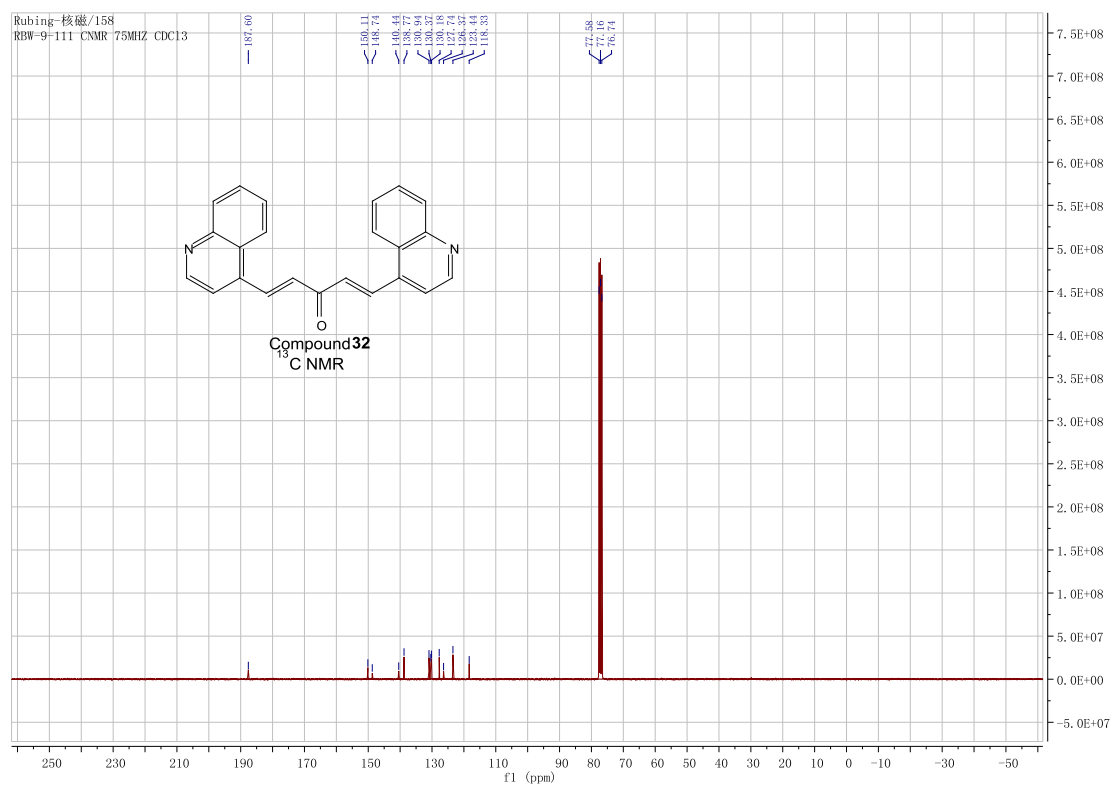

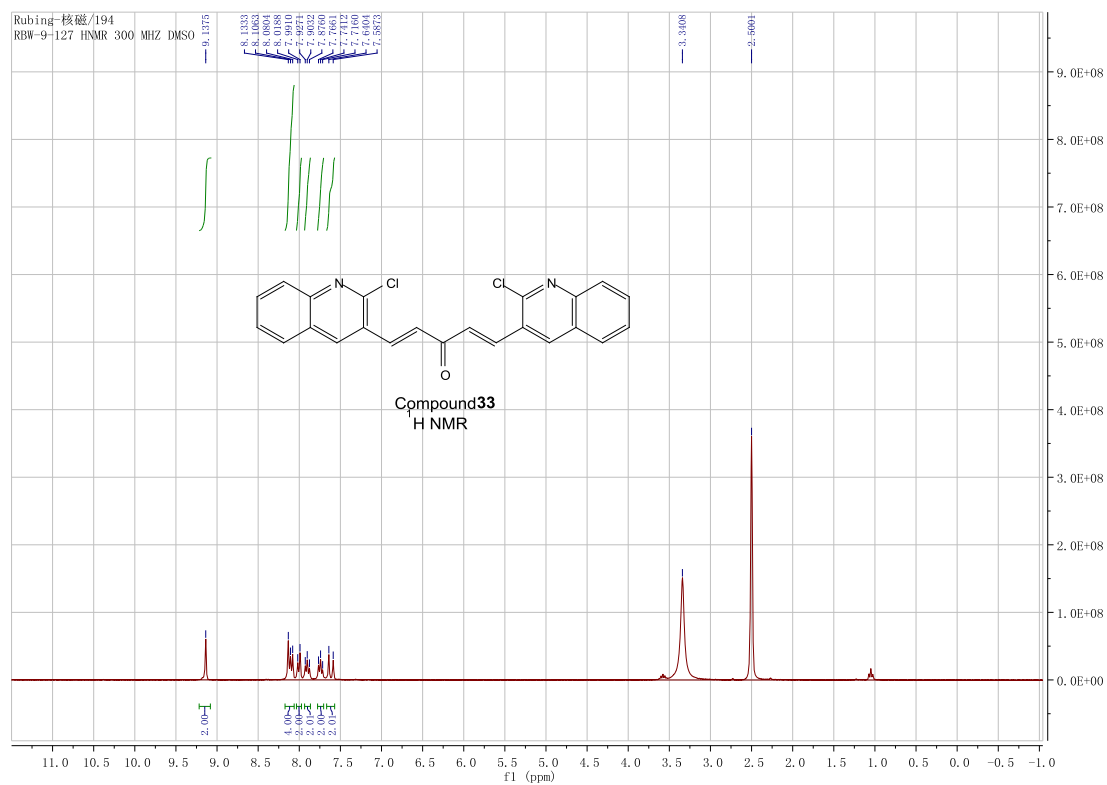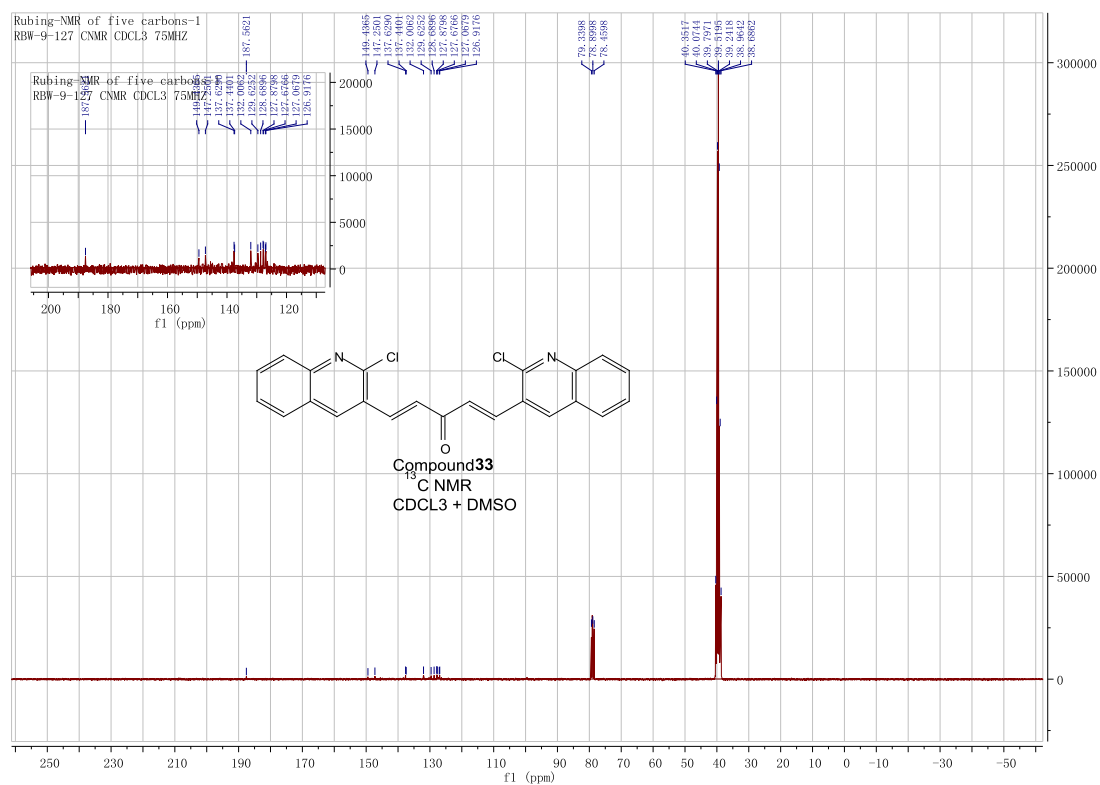

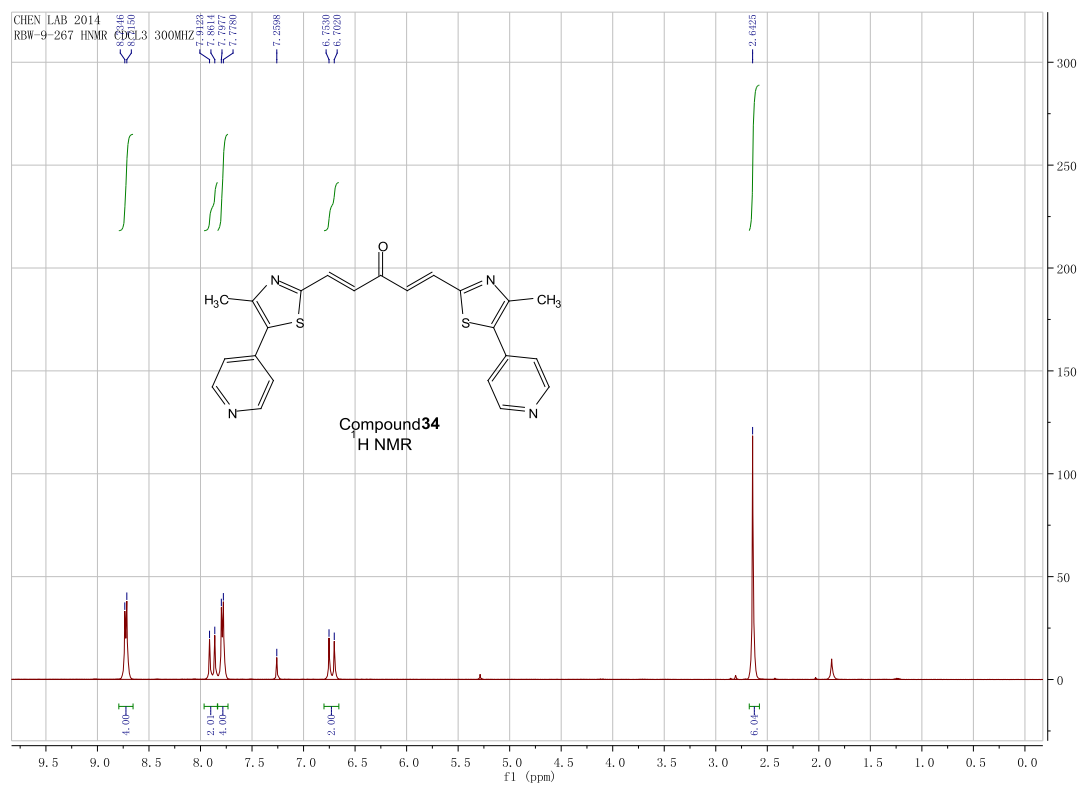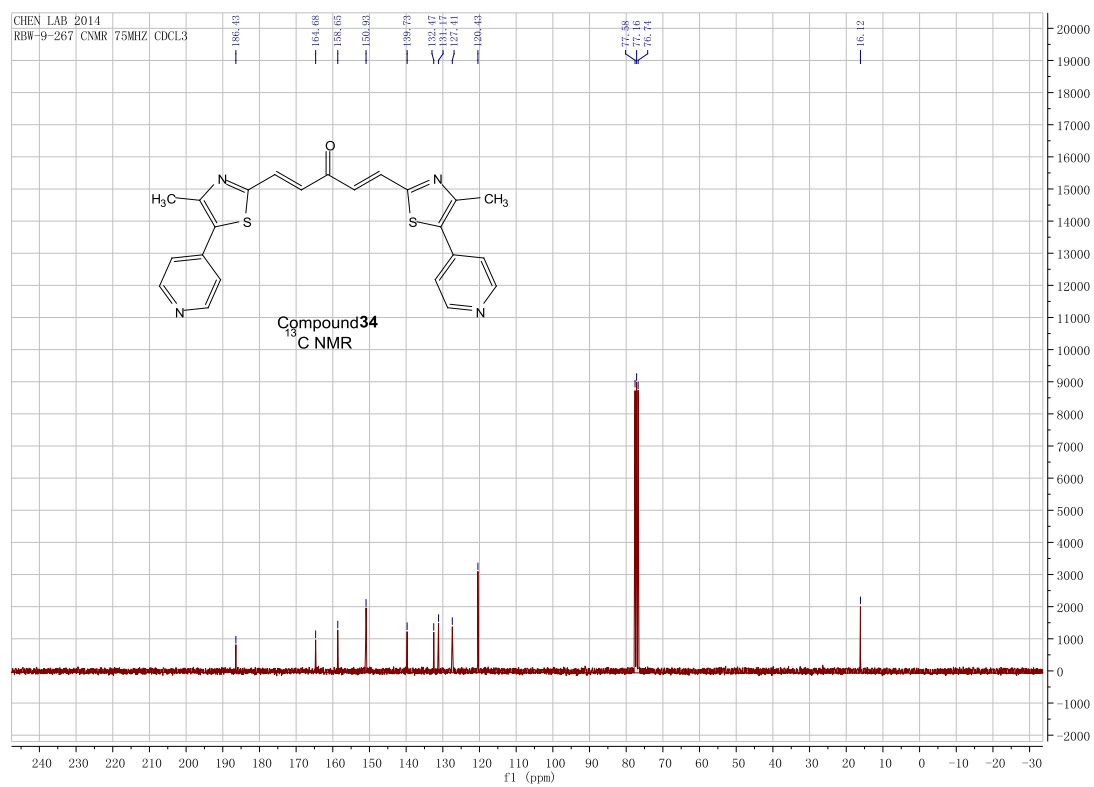

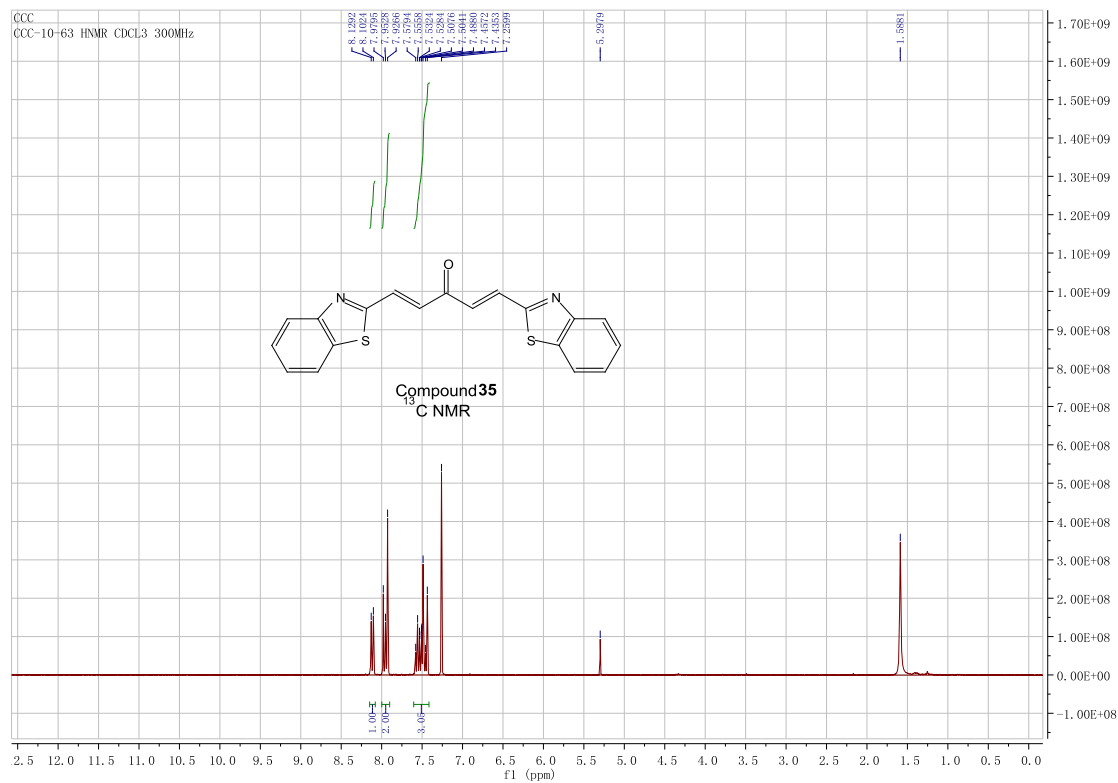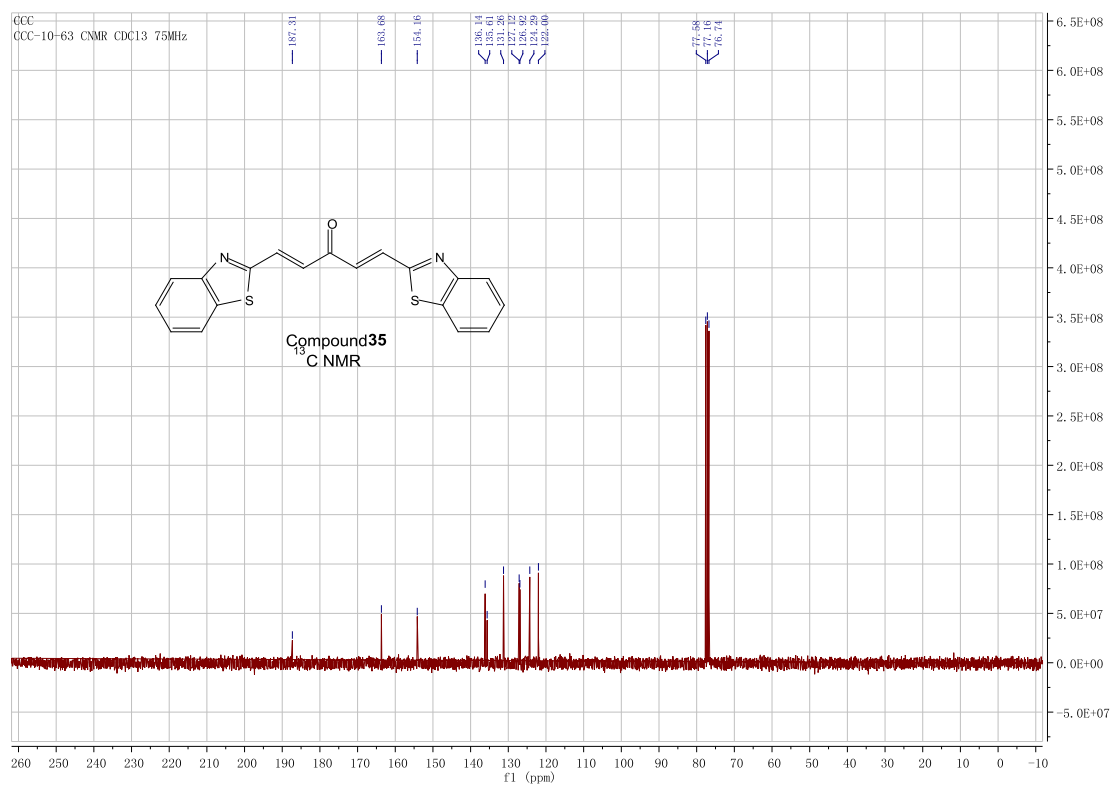

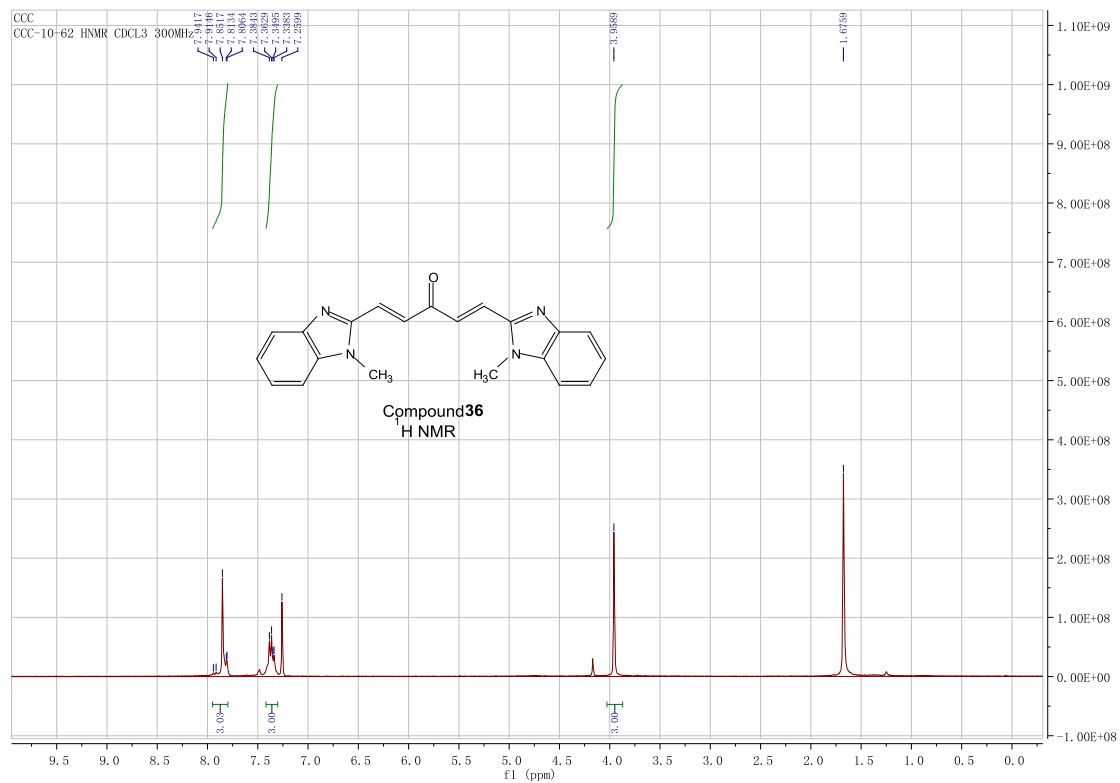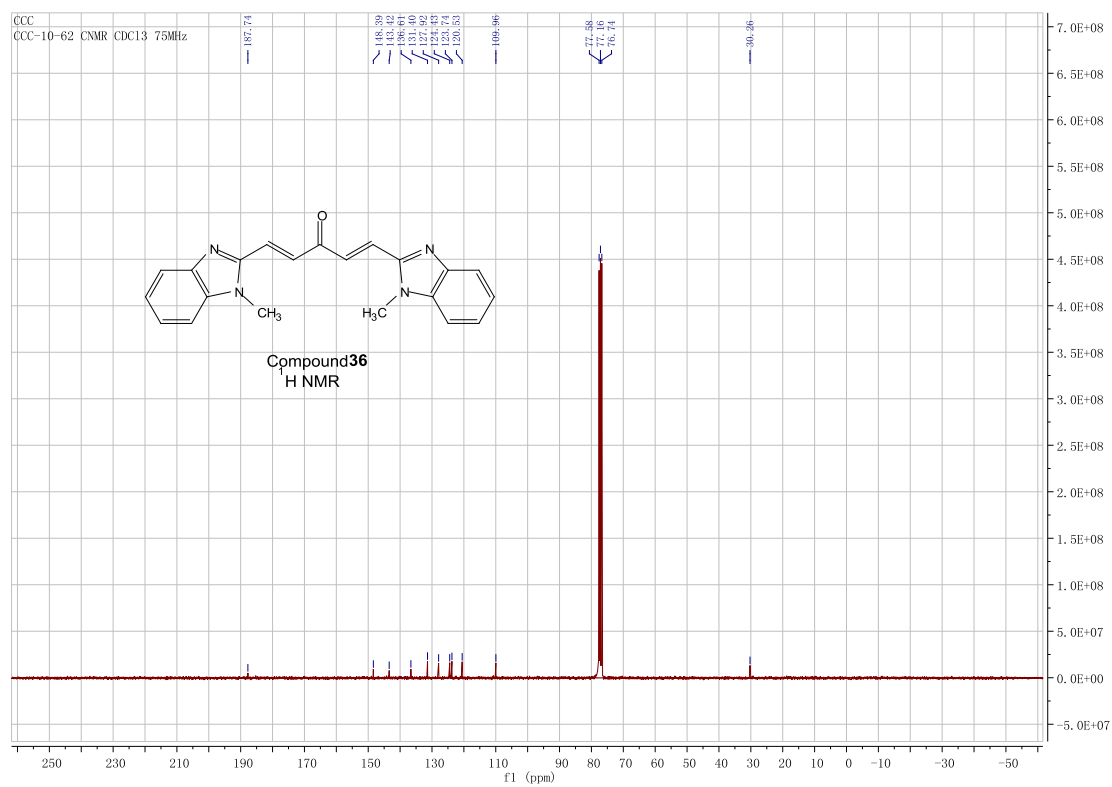



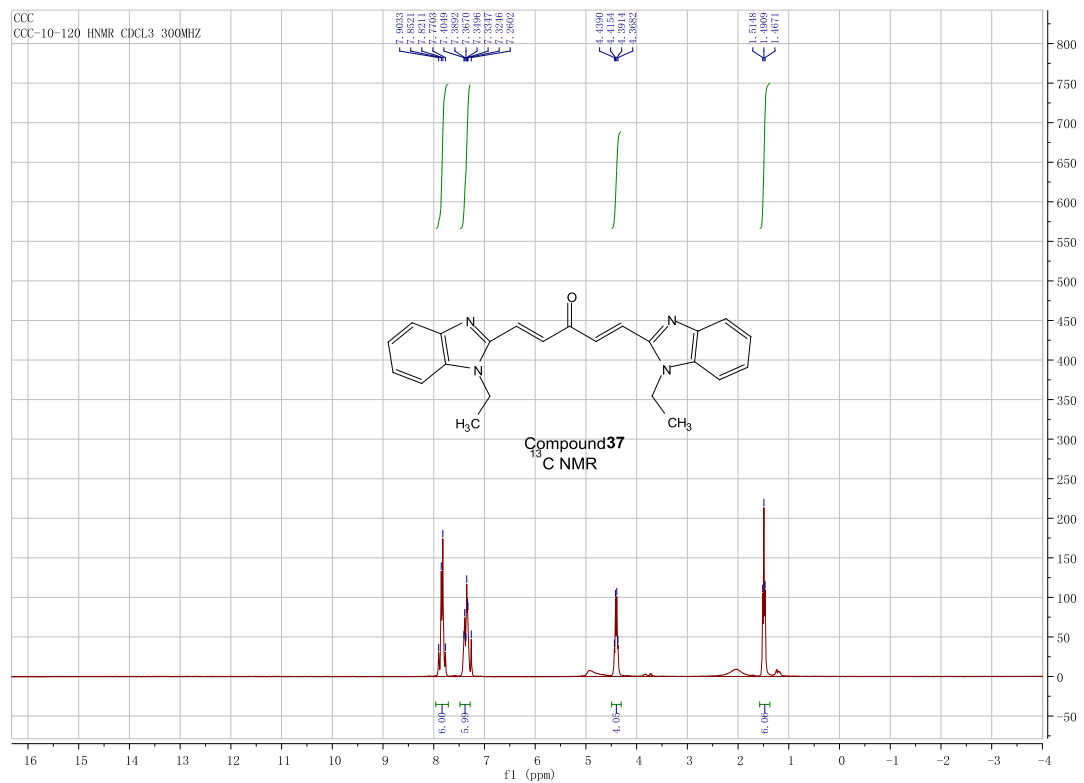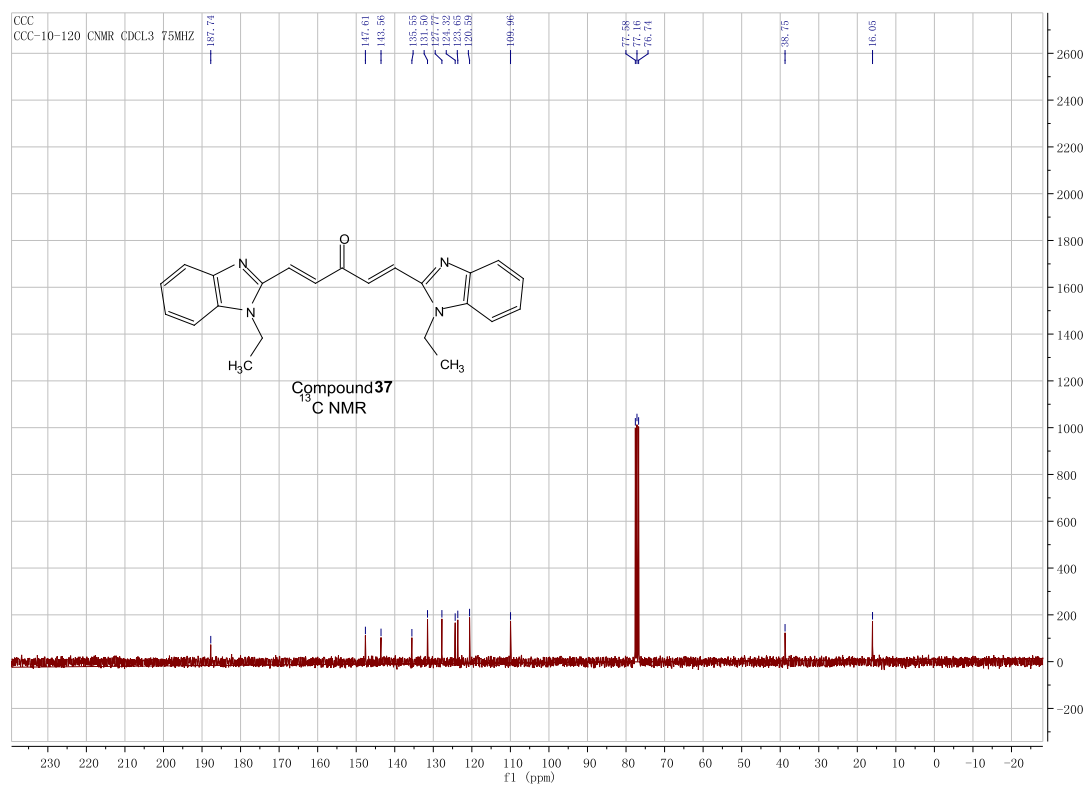

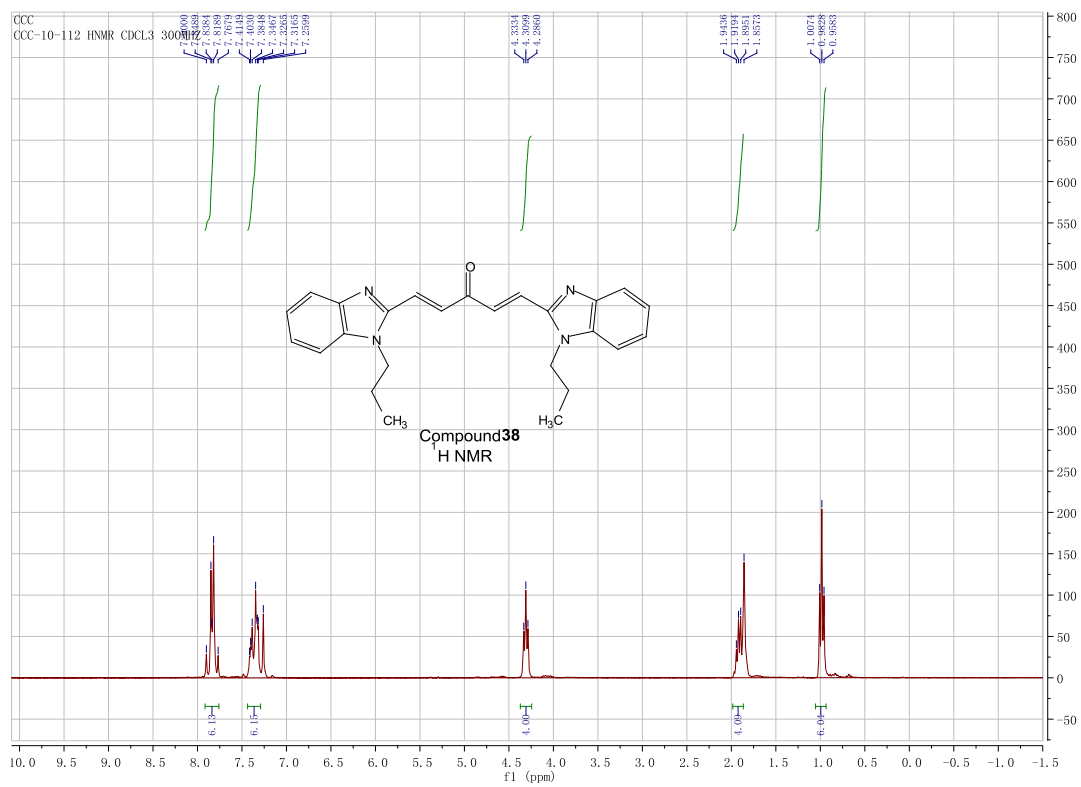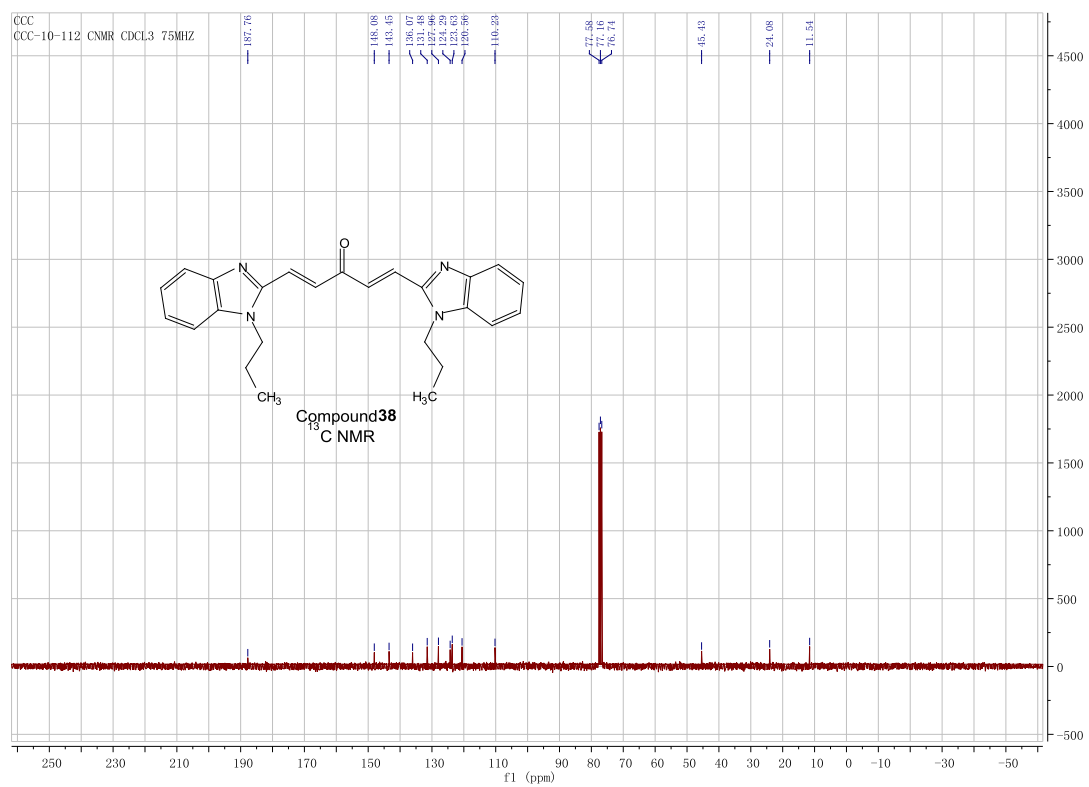

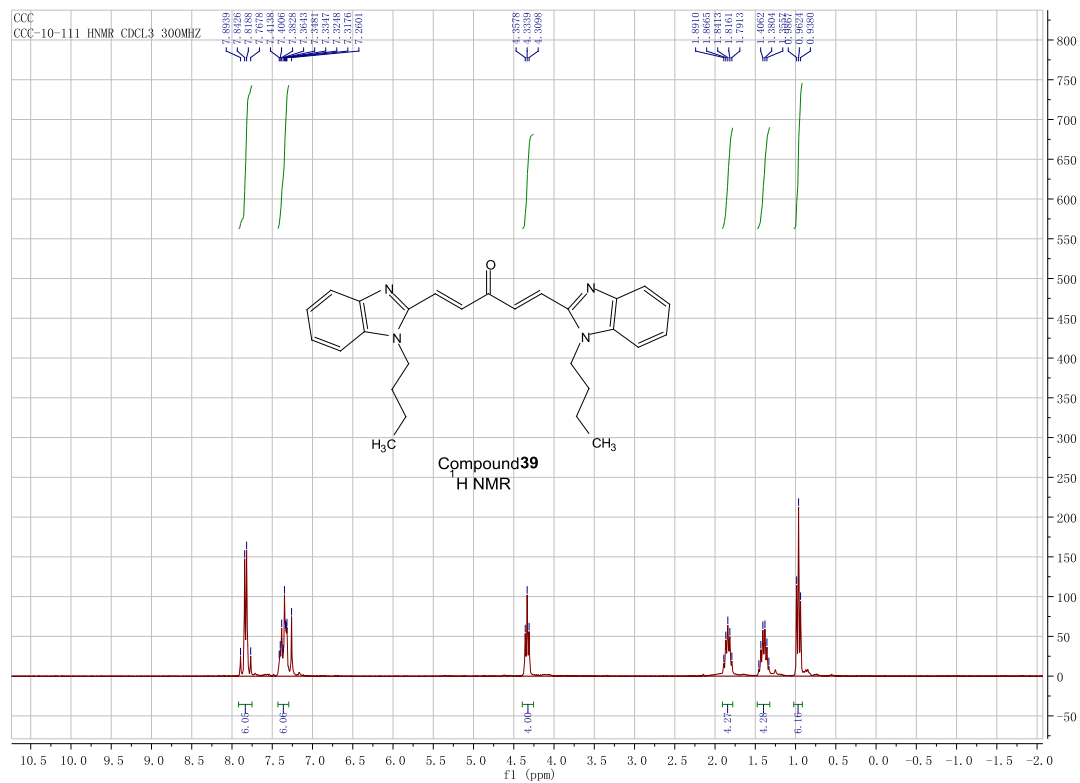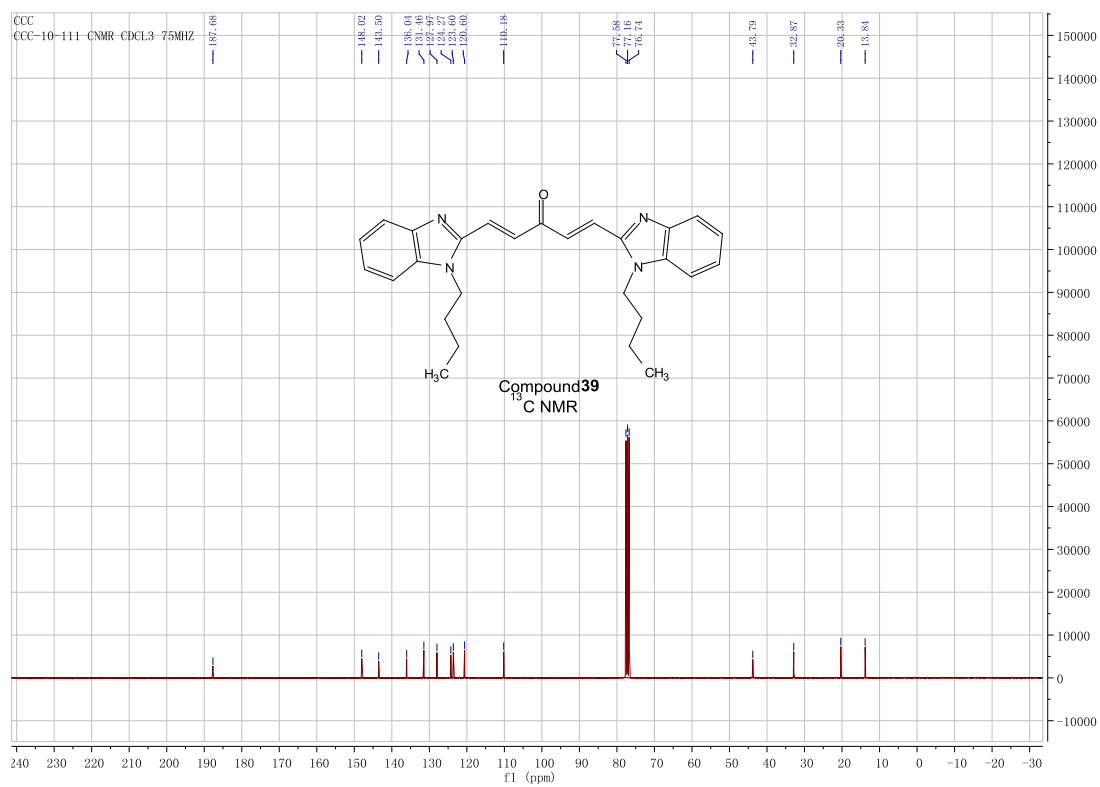

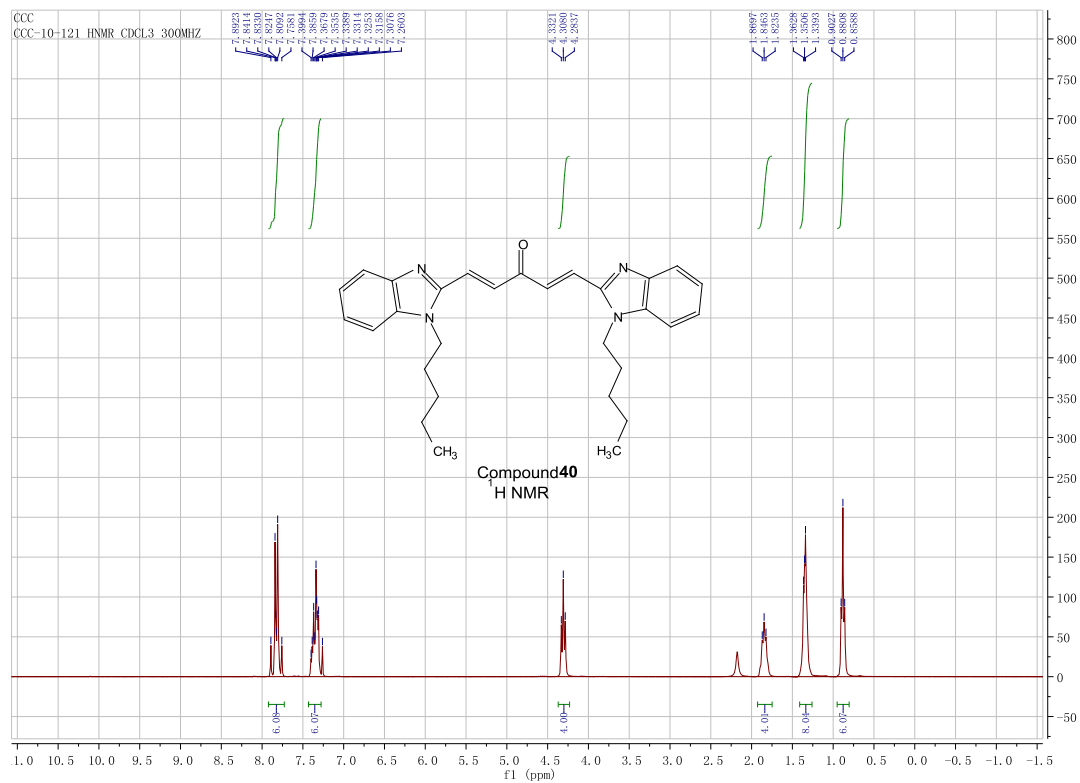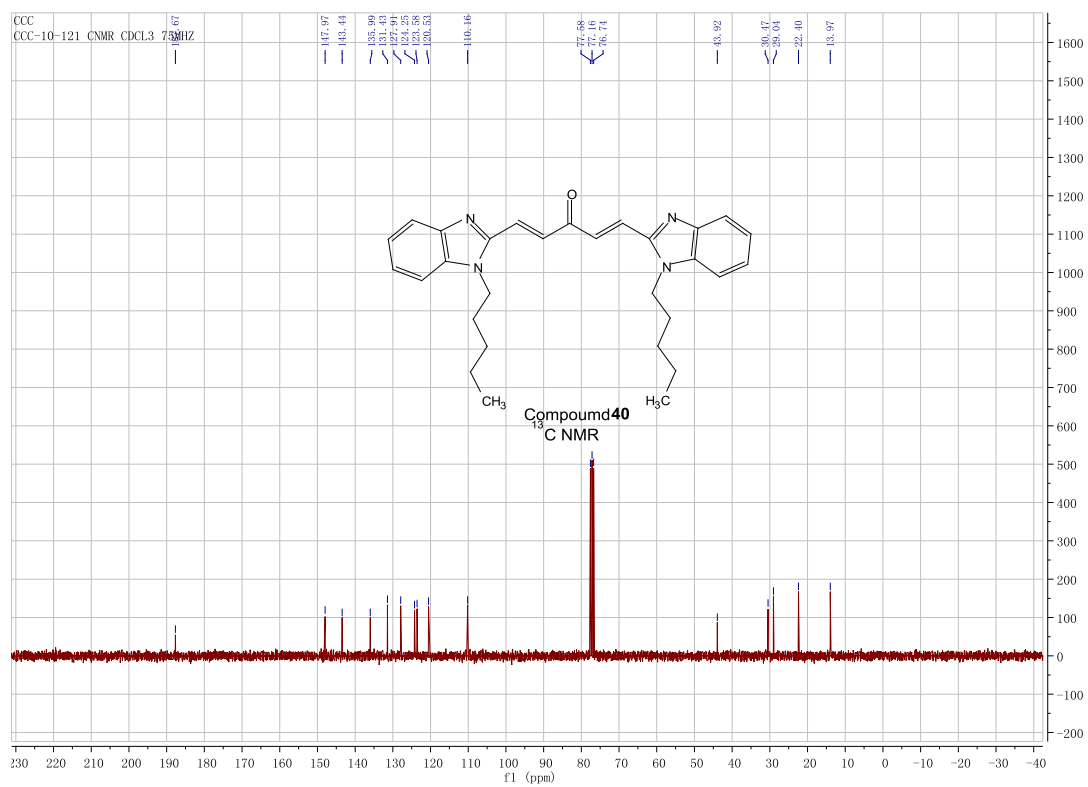

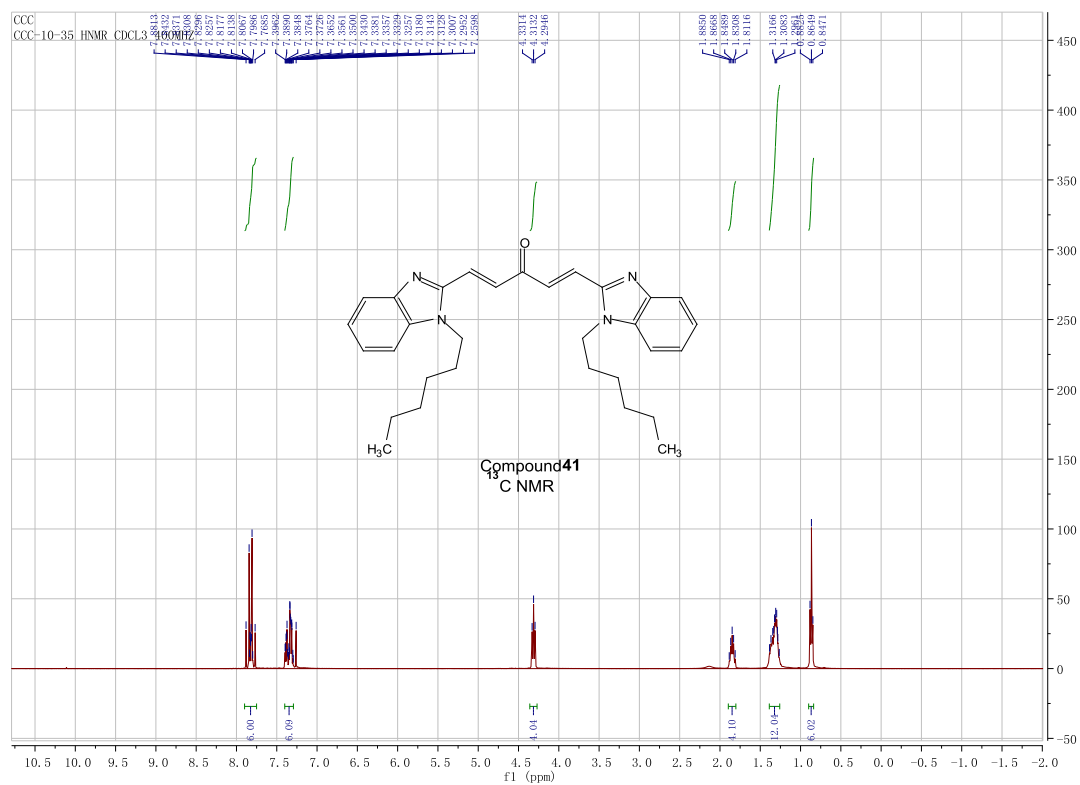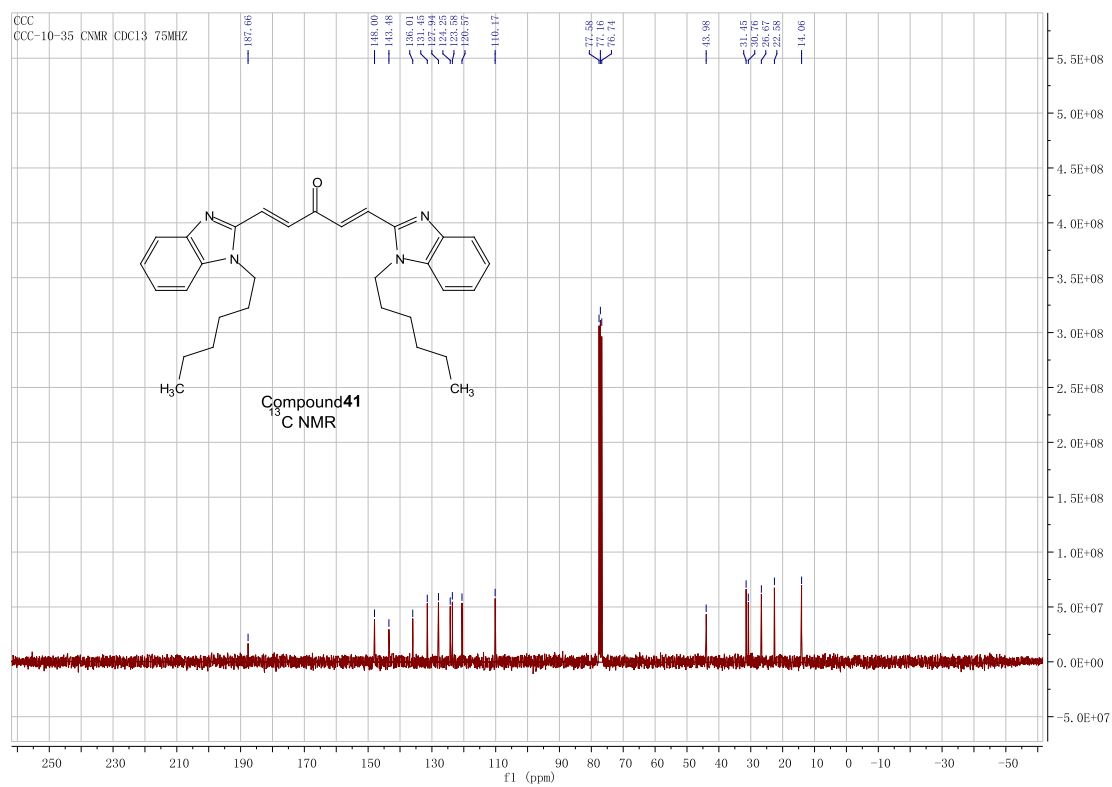

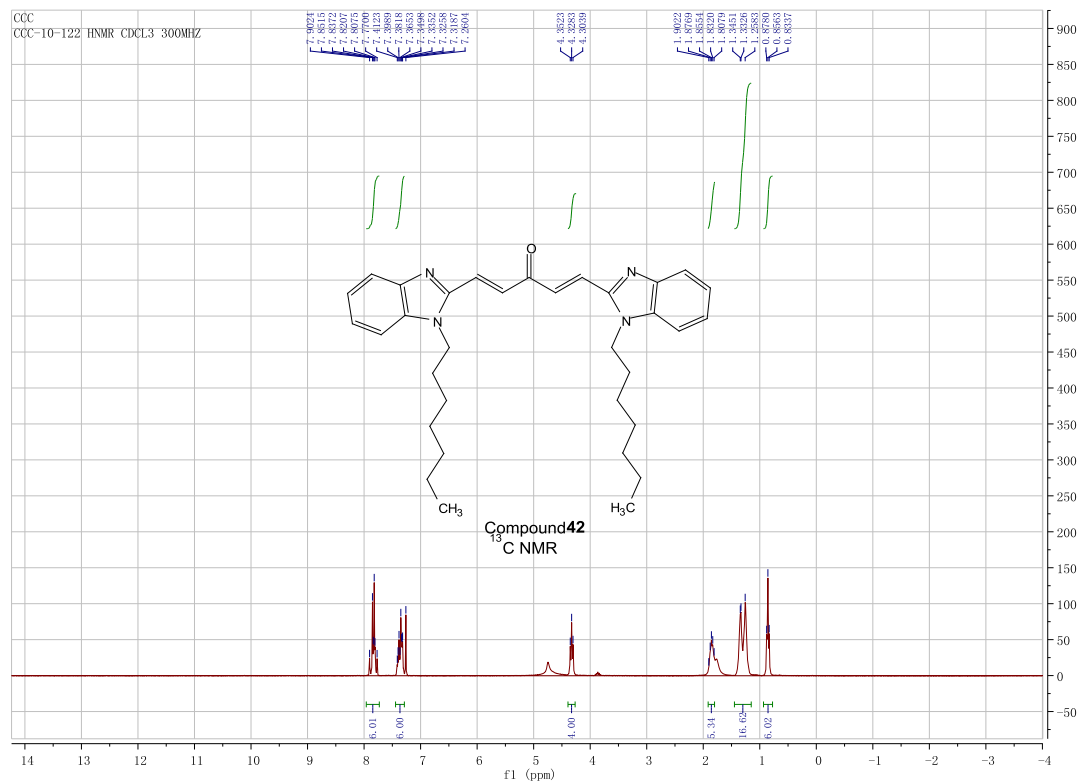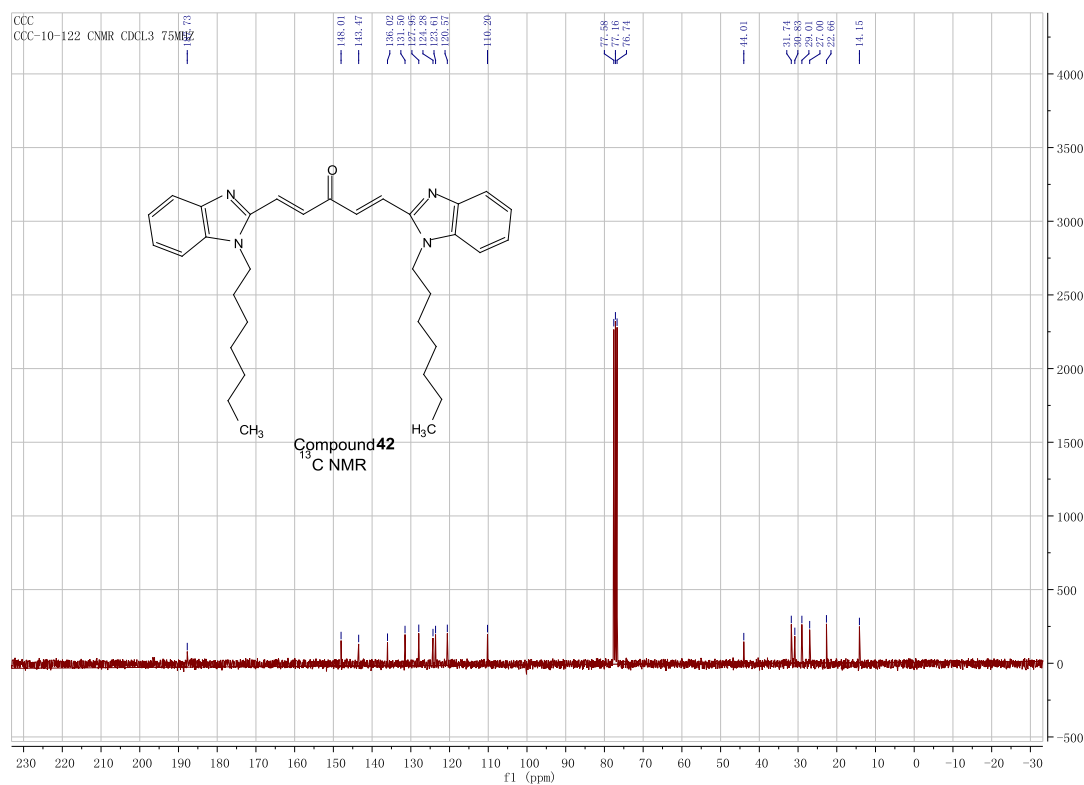

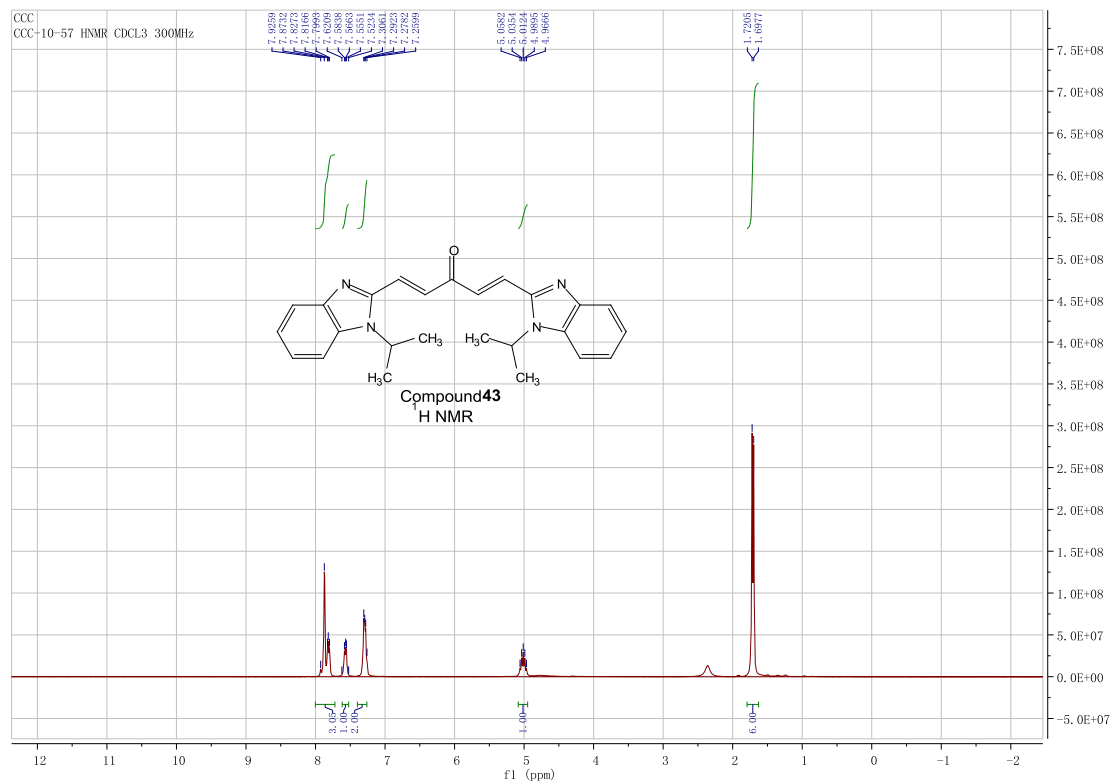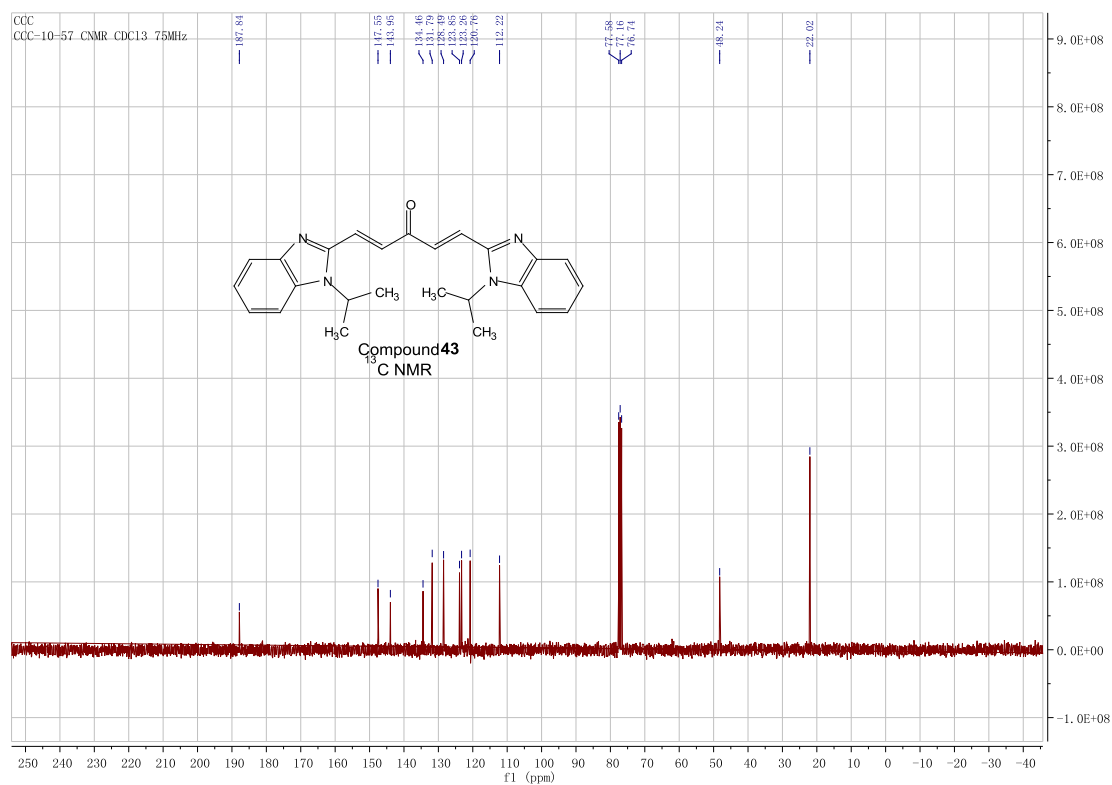

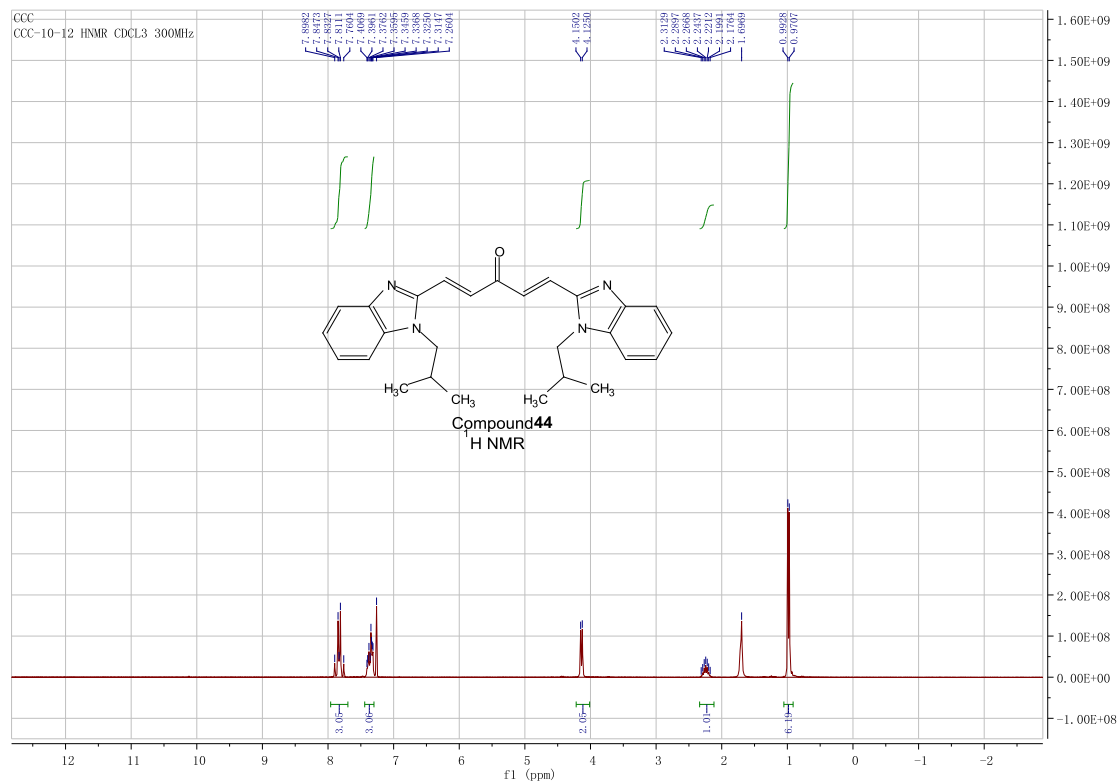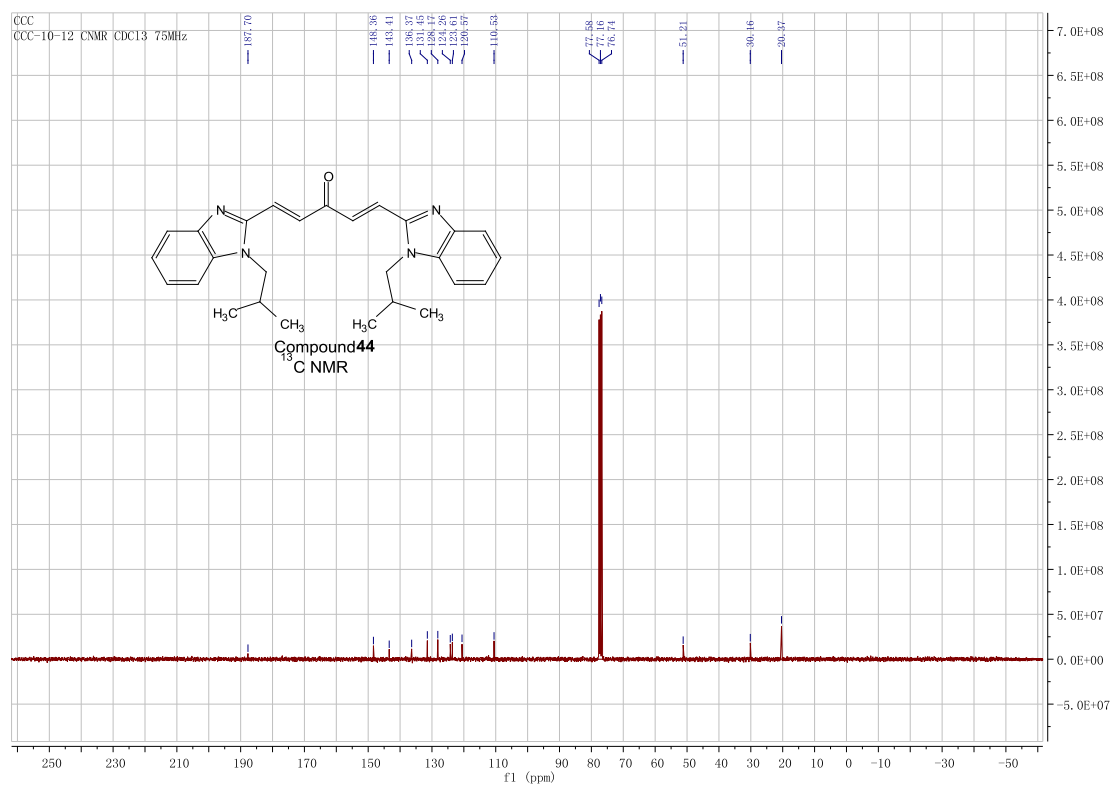



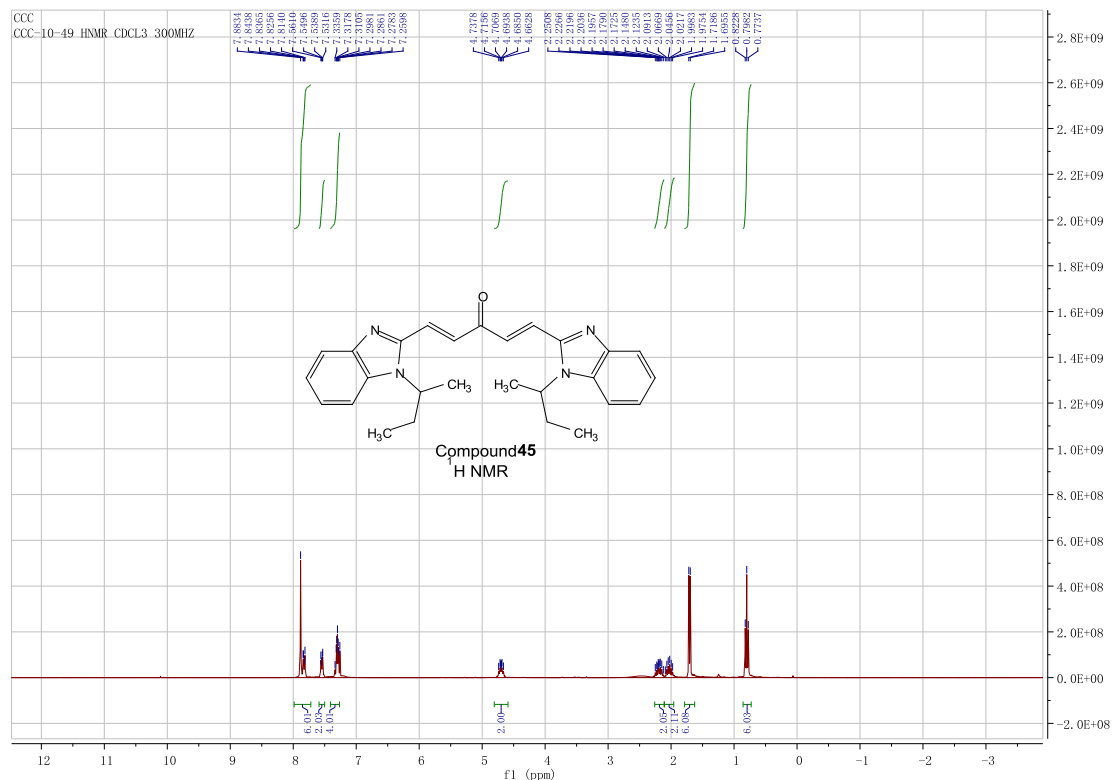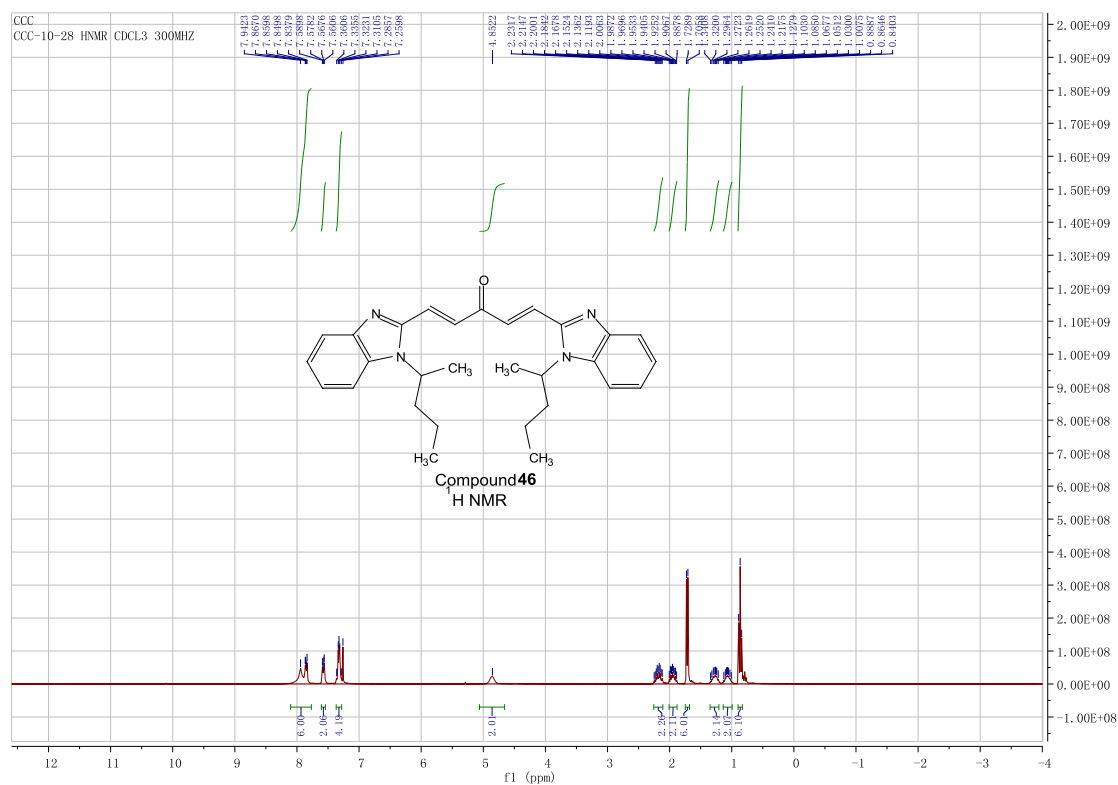

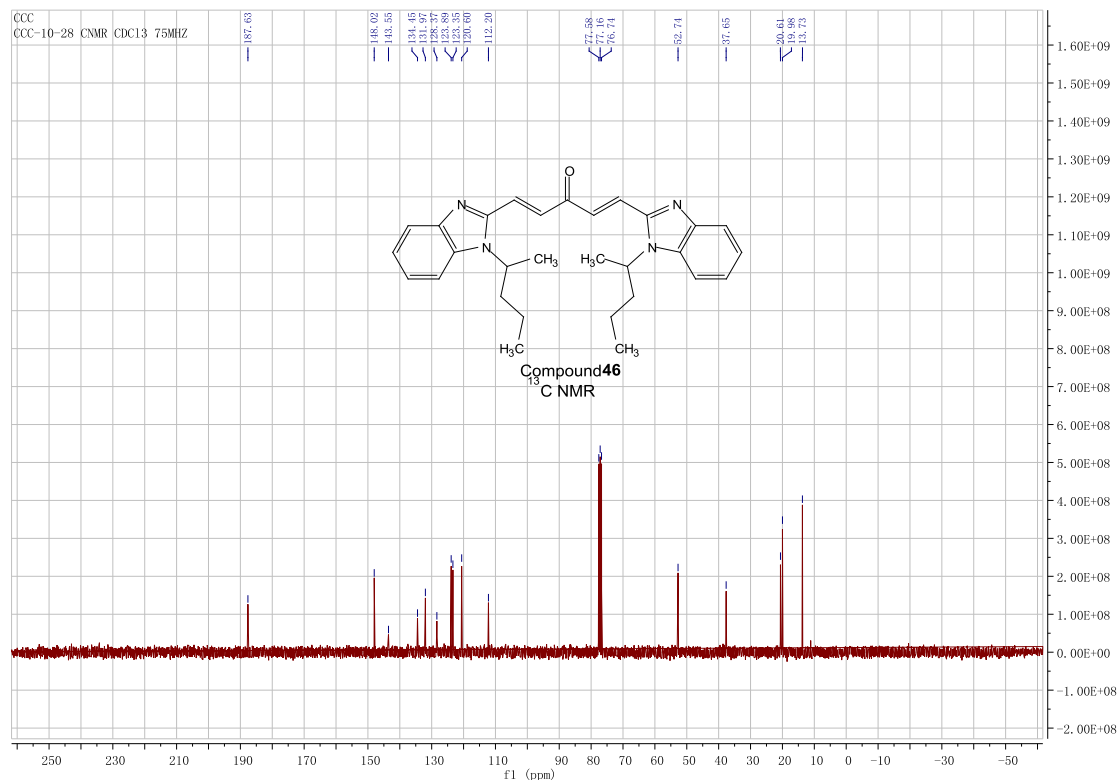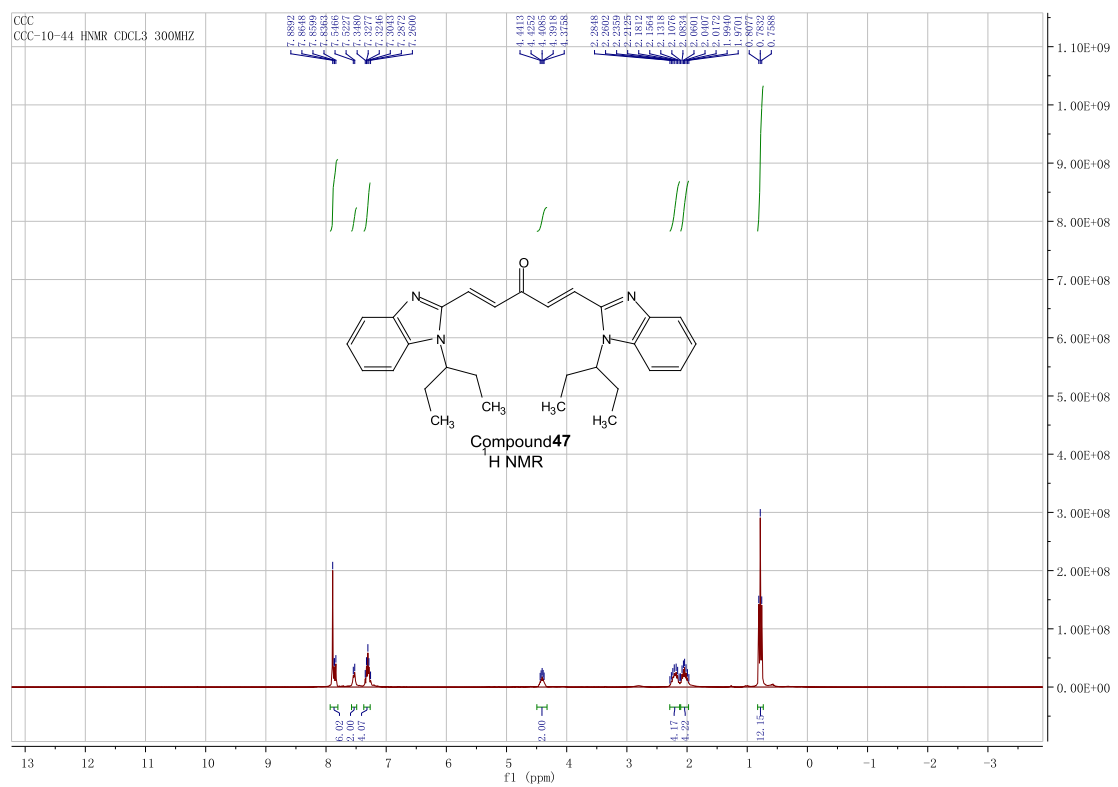

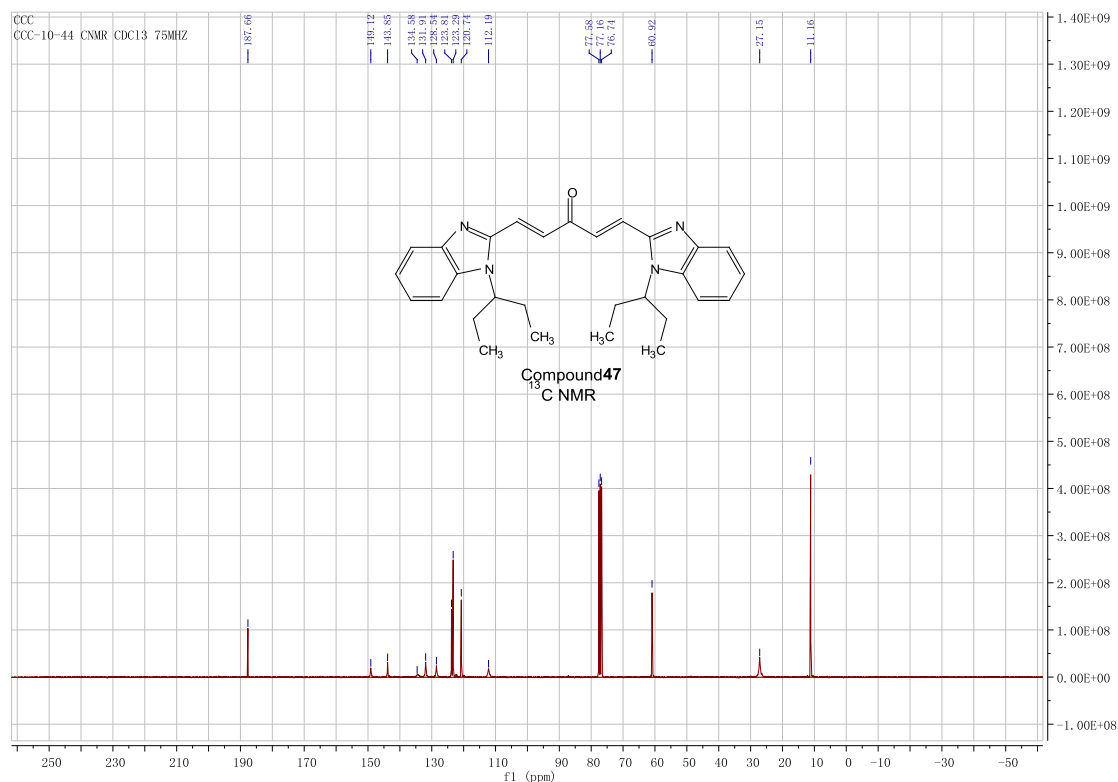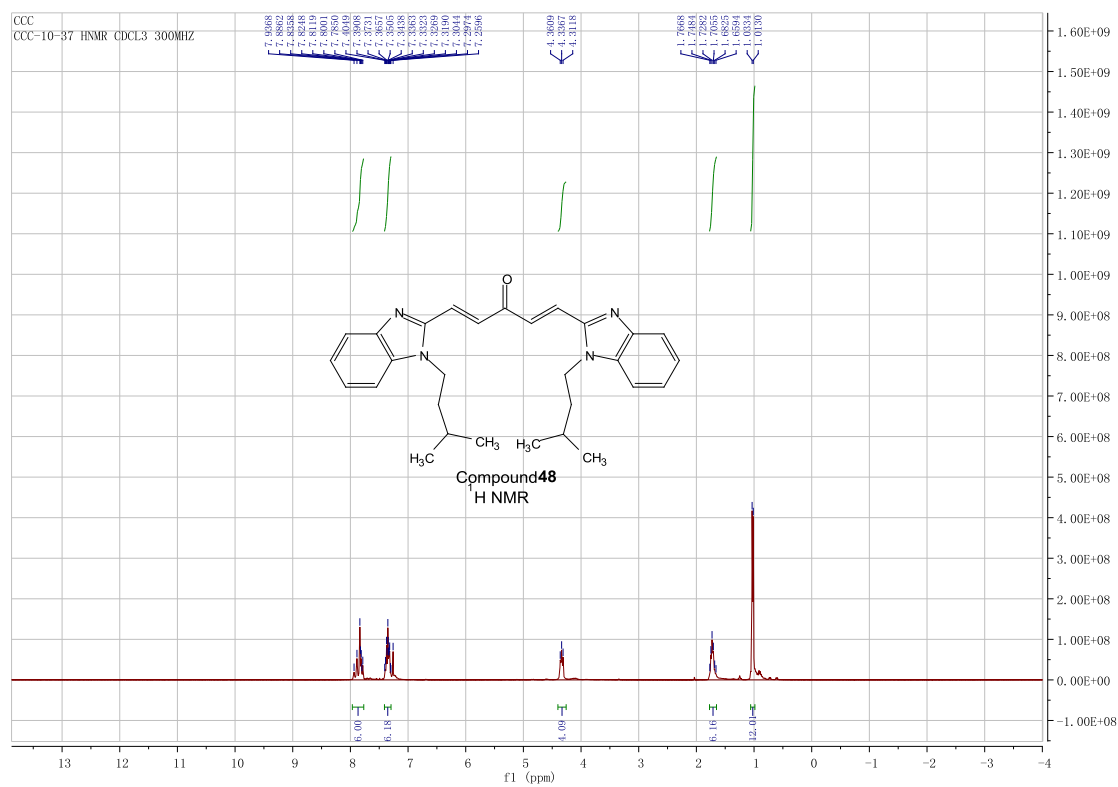

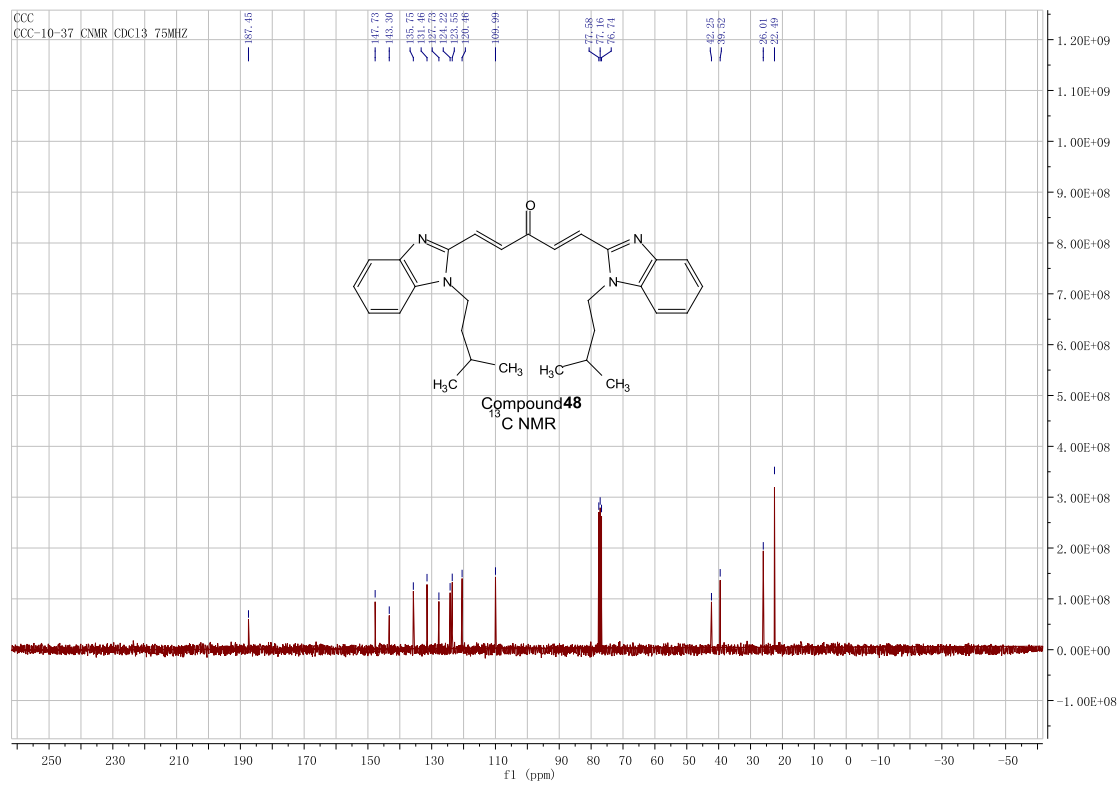

Supplement: NIHMS770950-supplement-Supplemental_info.pdf [file NIHMS770950-supplement-Supplemental_info.pdf]
